# Supplementary material for: Axial and helical thermally activated delayed fluorescence bicarbazole emitters: opposite modulation of circularly polarized luminescence through intramolecular charge-transfer dynamics
Source: Royal Society of Chemistry journal article supplement (doi:10.1039/d1tc03019a), 2021-01-01
Supplement: d1tc03019a1.pdf [file d1tc03019a1.pdf]

## *Electronic Supplementary Information*

### **Axial and helical thermally activated delayed fluorescence bicarbazole emitters: Opposite modulation of circularly polarized luminescence through intramolecular charge-transfer dynamics**

Patthira Sumsalee,<sup>a</sup> Laura Abella,<sup>b</sup> Thierry Roisnel,<sup>a</sup> Sabrina Lebrequier,<sup>c</sup> Grégory Pieters,<sup>c</sup>  
Jochen Autschbach<sup>b,\*</sup>, Jeanne Crassous<sup>a</sup> and Ludovic Favereau<sup>a,\*</sup>

<sup>a</sup> Univ Rennes, CNRS, ISCR-UMR 6226, ScanMAT-UMS 2001, F-35000 Rennes, France.  
E-mails: ludovic.favereau@univ-rennes1.fr.

<sup>b</sup> Department of Chemistry, University at Buffalo, State University of New York, Buffalo,  
NY 14260, USA. E-mail: jochena@buffalo.edu.

<sup>c</sup> Université Paris-Saclay, CEA, INRAE, Département Médicaments et Technologies pour la  
Santé (DMTS), SCBM, 91191 Gif-sur-Yvette, France.

### **Table of Contents**

|                                                                    |            |
|--------------------------------------------------------------------|------------|
| <b>A. General methods</b>                                          | <b>S2</b>  |
| <b>B. Synthetic procedures</b>                                     | <b>S3</b>  |
| <b>C. Steady-state photophysical chiroptical characterizations</b> | <b>S9</b>  |
| <b>D. X-Ray experimental data</b>                                  | <b>S17</b> |
| <b>E. HPLC separation</b>                                          | <b>S19</b> |
| <b>F. NMR spectra</b>                                              | <b>S35</b> |
| <b>G. Theoretical calculations</b>                                 | <b>S42</b> |
| <b>H. References</b>                                               | <b>S58</b> |

## A. General methods

$^1\text{H}$  and  $^{13}\text{C}$  NMR spectra were recorded at room temperature on an *AVANCE III 400 BRUKER* or an *AVANCE I 500 BRUKER* at Centre Régional de Mesures Physiques de l'Ouest (CRMPO), Université de Rennes 1. Chemical shifts  $\delta$  are given in ppm and coupling constants  $J$  in Hz. Chemical shifts for  $^1\text{H}$  NMR spectra are referenced relative to residual protium in the deuterated solvent ( $\delta = 7.26$  ppm,  $\text{CDCl}_3$ ).  $^{13}\text{C}$  shifts are referenced to  $\text{CDCl}_3$  peaks at  $\delta = 77.16$  ppm.

High-resolution mass (HR-MS) determinations were performed at CRMPO on a Bruker MaXis 4G by ASAP (+ or -) or ESI and MALDI with  $\text{CH}_2\text{Cl}_2$  as solvent techniques. Experimental and calculated masses are given with consideration of the mass of the electron.

UV-Visible (UV-vis, in  $\text{M}^{-1} \text{cm}^{-1}$ ) absorption spectra were recorded on a UV-2401PC Shimadzu spectrophotometer.

Steady-state luminescence spectra were measured using an Edinburgh FS920 Steady State Fluorimeter combined with a FL920 Fluorescence Lifetime Spectrometer. The spectra were corrected for the wavelength dependence of the detector, and the quoted emission maxima refer to the values after correction. Life-times measurements were conducted with 375 nm diode laser excitation (EPL-series) plugged to a TCSPC pulsed source interface. Absolute fluorescence quantum yields  $\phi$  were recorded with a Hamamatsu C9920-03 integrating sphere.

Electrochemical measurements were performed with a potentiostat PGSTAT 302N controlled by resident GPES (General Purpose Electrochemical System 4.9) software using a conventional single auxiliary electrode were platinum electrode potassium chloride calomel electrode (SCE). The supporting electrolyte was 0.1 N  $\text{Bu}_4\text{NPF}_6$  (tetrabutylammonium hexafluorophosphate) in dichloromethane and solutions were purged with argon before the measurements. All potentials are quoted r experiments, the scan rate was either 100, 200 or 400 mV/s.

Electronic circular dichroism (ECD, in  $\text{M}^{-1} \text{cm}^{-1}$ ) was measured on a Jasco J-815 Circular Dichroism Spectrometer (IFR140 facility - Biosit - Université de Rennes 1).

The circularly polarized luminescence (CPL) measurements were performed using a home-built CPL spectrofluoropolarimeter (constructed with the help of the JASCO Company). The samples were excited using a  $90^\circ$  geometry with a Xenon ozone-free lamp 150 W LS. The following parameters were used: emission slit width  $\approx 2$  mm, integration time = 4 sec, scan speed = 50 nm/min, accumulations = 10. The concentration of all the samples was ca.  $10^{-6}$  M.

Thin-layer chromatography (TLC) was performed on aluminum sheets precoated with Merck 5735 Kieselgel 60F254. Column chromatography was carried out with Merck 5735 Kieselgel 60F (0.040-0.063 mm mesh). Chemicals were purchased from Sigma-Aldrich, Alfa Aesar or TCI Europe and used as received.

## B. Synthetic procedures

**BICOL** was prepared following the previously reported procedure.<sup>1</sup> Bis-iodo Axial BICOL, **Ax1**, and Bis-iodo helical BICOL, **Hel1**, were obtained by iodination reaction using the following procedure: In round bottom flask, a mixture of axial or helical BICOL (100 mg, 1 eq.) in CHCl<sub>3</sub>/CH<sub>3</sub>COOH 6:3 ml was stirred at 0 °C under argon. N-iodosuccinimide (1.8 eq.) was slowly added and stirred at 0 °C. After 5 hours (the reaction was followed by thin layer chromatography), the resulting mixture was then purified through a flash column using CHCl<sub>3</sub> as the eluent. The desired compound was finally obtained as a white solid in 89%. The product was directly used in the next step without characterization.

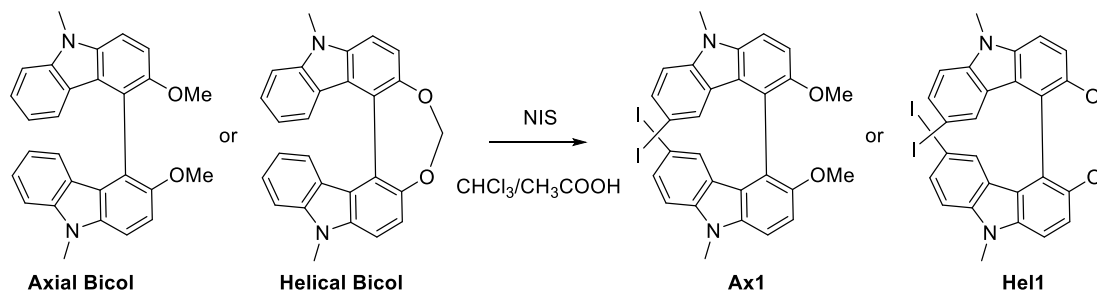

**Hel-*o*-CHO**, **Hel-*o*-CN**, **Ax-*o*-CHO**, **Ax-*p*-CN** and **Hel-*p*-CN** were synthesized by using Suzuki cross coupling reactions with corresponding arylboronic acids.

(±)-2,2'-(3,3'-dimethoxy-9,9'-dimethyl-9H,9'H-[4,4'-bicarbazole]-6,6'-diyl)dibenzaldehyde:  
(±)-**Ax-*o*-CHO**

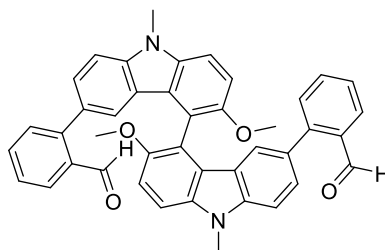

In a dried Schlenck, 3,6-diiodo-axial BICOL (0.23 g, 0.34 mmol), 2-cyanophenyl boronic acid (0.21 g, 1.37 mmol), K<sub>2</sub>CO<sub>3</sub> (0.31g, 2.30 mmol) were dissolved in a mixture of DMF (12 mL) and water (4 mL) under argon. The mixture was degassed by argon bubbling for 15 minutes before Pd(PPh<sub>3</sub>)<sub>4</sub> (0.079 g, 0.07 mmol) was added and the resulting solution refluxed for 8 hours. After cooling down to room temperature, the reaction was poured into 20 mL of water and the organic layer was extracted 3 times with methylene chloride (3\*20 mL) and thus washed with brine (20 mL) and dried over MgSO<sub>4</sub>. Solvents were removed under vacuum and the product was purified by chromatography (EtOAc/heptane, 25:75) to give white product 86%.

<sup>1</sup>H NMR (400 MHz, chloroform-*d* (CDCl<sub>3</sub>)) δ 9.42 (s, 2H), 7.91 (dd, *J* = 7.8, 1.5 Hz, 2H), 7.52 – 7.46 (m, 2H), 7.46 – 7.39 (m, 4H), 7.39 – 7.36 (m, 2H), 7.34 (dd, *J* = 8.4, 1.8 Hz, 4H), 7.15 (dd, *J* = 7.8, 1.2 Hz, 2H), 6.52 (d, *J* = 1.8 Hz, 2H), 3.94 (s, 6H), 3.81 (s, 6H).

<sup>13</sup>C NMR (400 MHz, chloroform-*d* (CDCl<sub>3</sub>)) δ 192.3, 151.1, 146.9, 141.6, 137.2, 135.2 – 116.4, 116.7 – 95.5, 57.8, 29.5.

**HR-MS** Q-Exactive, ESI, 370 °C; ion  $[M+Na]^+$ ,  $C_{42}H_{32}N_2O_4Na$  m/z calculated 651.22543, m/z experimental 651.2250 ( $\Delta=1$  ppm).

#### Experimental optical rotation values

(+)-**Ax-o-CHO**:  $[\alpha]_D^{25} = +98 \pm 2\%$ ,  $[\phi]_D^{25} = +613$  ( $c = 1.3 \times 10^{-3}$ ,  $CHCl_3$ ).

(-)-**Ax-o-CHO**:  $[\alpha]_D^{25} = -96 \pm 2\%$ ,  $[\phi]_D^{25} = -603$  ( $c = 1.2 \times 10^{-3}$ ,  $CHCl_3$ ).

(±)-2,2'-(8,17-dimethyl-8,17-dihydro-[1,3]dioxepino[4,5-c:7,6-c']dicarbazole-11,14-diyl)dibenzaldehyde: (±)-**Hel-o-CHO**

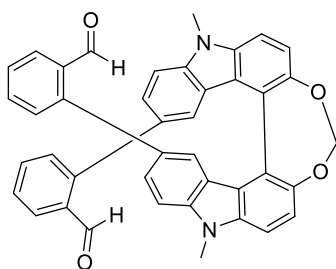

Following the same procedure than **Ax-o-CHO**, **Hel-o-CHO** was obtained as a yellow solid in 68% yield.

**<sup>1</sup>H NMR (400 MHz, chloroform-d (CDCl<sub>3</sub>))**  $\delta$  9.19 (s, 2H), 7.81 (dd,  $J = 7.4, 1.9$  Hz, 2H), 7.62 – 7.55 (m, 2H), 7.55 – 7.48 (m, 4H), 7.39 – 7.30 (m, 8H), 7.03 (d,  $J = 1.8$  Hz, 2H), 5.69 (s, 2H), 4.04 (s, 6H).

**<sup>13</sup>C NMR (400 MHz, chloroform-d (CDCl<sub>3</sub>))**  $\delta$  191.9, 146.5, 141.6, 139.3, 133.1, 132.7, 131.5, 128.4, 127.6, 126.8, 124.9, 122.2, 120.7, 119.3, 109.4, 108.2, 103.8, 29.4.

**HR-MS** Q-Exactive, ESI, 370 °C; ion  $[M+Na]^+$ ,  $C_{42}H_{32}N_2O_5Na$  m/z calculated 667.22034, m/z experimental 667.2195 ( $\Delta=0$  ppm).

#### Experimental optical rotation values

(+)-**Hel-o-CHO**:  $[\alpha]_D^{25} = +129 \pm 2\%$ ,  $[\phi]_D^{25} = +790$  ( $c = 1.3 \times 10^{-3}$ ,  $CHCl_3$ ).

(-)-**Hel-o-CHO**:  $[\alpha]_D^{25} = -132 \pm 2\%$ ,  $[\phi]_D^{25} = -808$  ( $c = 1.2 \times 10^{-3}$ ,  $CHCl_3$ ).

(±)-2,2'-(8,17-dimethyl-8,17-dihydro-[1,3]dioxepino[4,5-c:7,6-c']dicarbazole-11,14-diyl)dibenzonitrile: (±)-**Hel-o-CN**

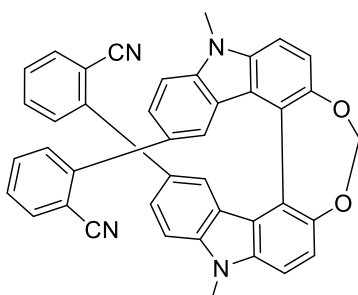

Following the same procedure than **Ax-o-CHO**, **Hel-o-CN** was obtained as a yellow solid in 52% yield.

**<sup>1</sup>H NMR (400 MHz, chloroform-d (CDCl<sub>3</sub>))** δ 7.70 (dd, *J* = 8.5, 1.8 Hz, 2H), 7.62 – 7.58 (m, 2H), 7.58 – 7.51 (m, 6H), 7.24 – 7.18 (m, 4H), 7.09 (d, *J* = 1.8 Hz, 2H), 5.70 (s, 2H), 5.63 – 5.56 (m, 2H), 4.04 (s, 6H).

**<sup>13</sup>C NMR (400 MHz, chloroform-d (CDCl<sub>3</sub>))** δ 146.8, 146.1, 141.8, 139.4, 133.1, 131.8, 130.2, 128.5, 126.5, 125.2, 122.7, 120.9, 119.1, 110.7, 109.4, 107.4, 103.9, 30.2.

**HR-MS** Q-Exactive, ESI, 370 °C; ion [M+Na]<sup>+</sup>, C<sub>41</sub>H<sub>26</sub>N<sub>4</sub>O<sub>2</sub>Na m/z calculated 629.1948, m/z experimental 629.1954 (Δ=1 ppm).

#### Experimental optical rotation values

(+)-**Hel-o-CN**: [α]<sub>D</sub><sup>25</sup> = +232 ± 2%, [φ]<sub>D</sub><sup>25</sup> = +1405 (c = 1.3 × 10<sup>-3</sup>, CHCl<sub>3</sub>).

(-)-**Hel-o-CN**: [α]<sub>D</sub><sup>25</sup> = -228 ± 2%, [φ]<sub>D</sub><sup>25</sup> = -1381 (c = 1.2 × 10<sup>-3</sup>, CHCl<sub>3</sub>).

(±)-4,4'-(3,3'-dimethoxy-9,9'-dimethyl-9H,9'H-[4,4'-bicarbazole]-6,6'-diyl)dibenzonitrile: (±)-**Ax-p-CN**

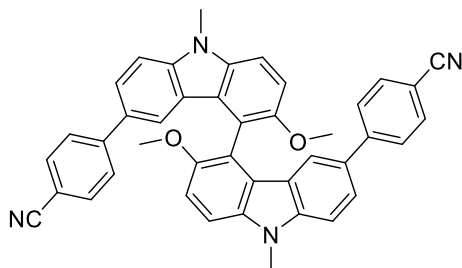

Following the same procedure than **Ax-o-CHO**, **Ax-p-CN** was obtained as a yellow solid in 86% yield.

**<sup>1</sup>H NMR (400 MHz, chloroform-d (CDCl<sub>3</sub>))** δ 7.58 (m, 8H), 7.48 (d, *J* = 8.8 Hz, 2H), 7.36 (d, *J* = 8.5 Hz, 2H), 7.25 – 7.18 (m, 4H), 6.85 (dd, *J* = 1.9, 0.6 Hz, 2H), 3.95 (s, 6H), 3.8 (s, 6H).

**<sup>13</sup>C NMR (400 MHz, chloroform-d (CDCl<sub>3</sub>))** δ 151.56, 146.36, 142.15, 137.47, 132.25, 128.78, 126.80, 124.57, 123.40, 122.31, 120.67, 119.70 (d, *J* = 96.4 Hz), 112.83, 109.15, 108.54 (d, *J* = 9.9 Hz), 58.06.

**HR-MS** Q-Exactive, ESI, 370 °C; ion [M+Na]<sup>+</sup>, C<sub>42</sub>H<sub>30</sub>N<sub>4</sub>O<sub>2</sub>Na m/z calculated 645.2261, m/z experimental 645.2254 (Δ=1 ppm).

#### Experimental optical rotation values

(+)-**Ax-p-CN**: [α]<sub>D</sub><sup>25</sup> = +136 ± 2%, [φ]<sub>D</sub><sup>25</sup> = +846 (c = 1.3 × 10<sup>-3</sup>, CHCl<sub>3</sub>).

(-)-**Ax-p-CN**: [α]<sub>D</sub><sup>25</sup> = -132 ± 2%, [φ]<sub>D</sub><sup>25</sup> = -822 (c = 1.2 × 10<sup>-3</sup>, CHCl<sub>3</sub>).

(±)-4,4'-(8,17-dimethyl-8,17-dihydro-[1,3]dioxepino[4,5-c:7,6-c']dicarbazole-11,14-diyl)dibenzonitrile: (±)-**Hel-p-CN**

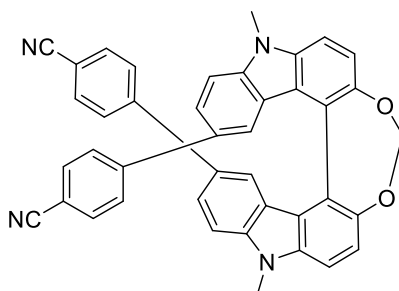

Following the same procedure than **Ax-o-CHO**, **Hel-p-CN** was obtained as a white solid in 74% yield.

**<sup>1</sup>H NMR (400 MHz, chloroform-d (CDCl<sub>3</sub>))** δ 7.63 (d, *J* = 8.7 Hz, 2H), 7.59 – 7.51 (m, 4H), 7.48 (dd, *J* = 8.5, 1.8 Hz, 2H), 7.42 – 7.34 (m, 6H), 7.20 (dd, *J* = 1.8, 0.6 Hz, 2H), 6.93 – 6.17 (m, 2H), 5.71 (s, 2H), 4.10 (s, 6H).

**<sup>13</sup>C NMR (400 MHz, chloroform-d (CDCl<sub>3</sub>))** δ 146.7, 141.8, 139.4, 131.8, 129.5, 127.2, 125.3, 123.5, 122.7, 120.9, 119.6, 119.0, 109.4, 108.0, 103.9, 29.6.

**HR-MS** Q-Exactive, ESI, 370 °C; ion [M+Na]<sup>+</sup>, C<sub>42</sub>H<sub>30</sub>N<sub>4</sub>O<sub>2</sub>Na *m/z* calculated 629.1948, *m/z* experimental 629.1947 (Δ=0 ppm).

#### Experimental optical rotation values

(+)-**Hel-p-CN**:  $[\alpha]_D^{25} = +618 \pm 2\%$ ,  $[\phi]_D^{25} = +3749$  (*c* = 1.3 × 10<sup>-3</sup>, CHCl<sub>3</sub>).

(-)-**Hel-p-CN**:  $[\alpha]_D^{25} = -626 \pm 2\%$ ,  $[\phi]_D^{25} = -3797$  (*c* = 1.2 × 10<sup>-3</sup>, CHCl<sub>3</sub>).

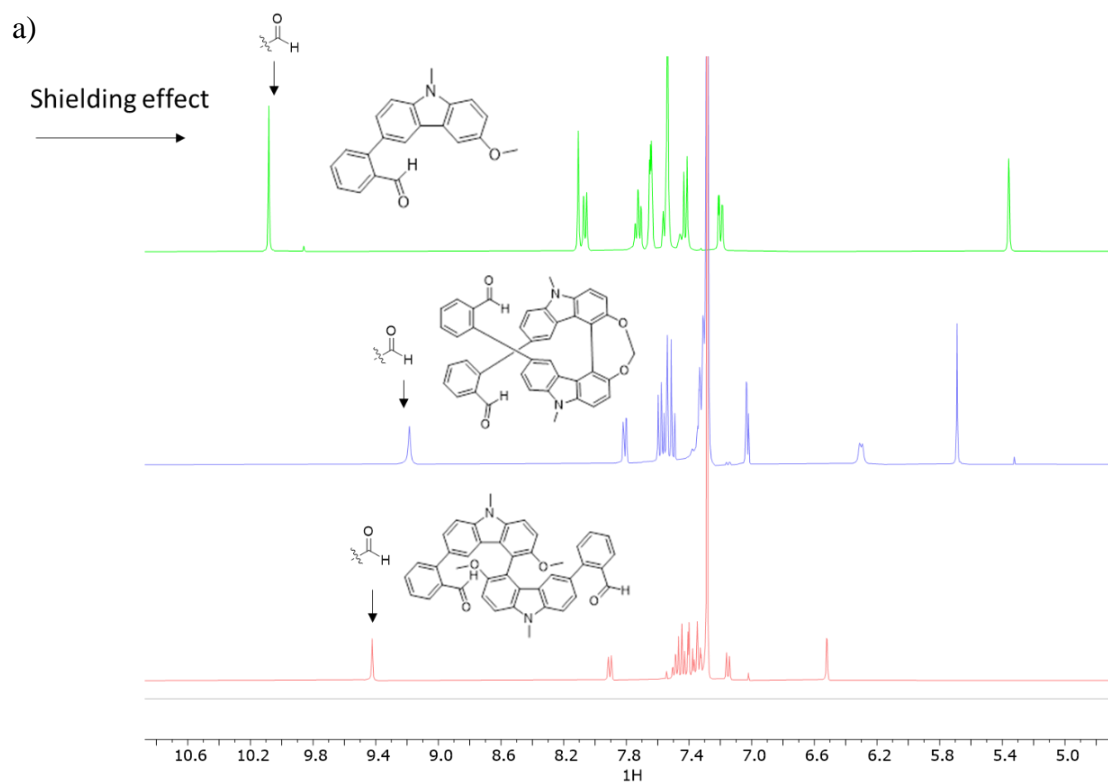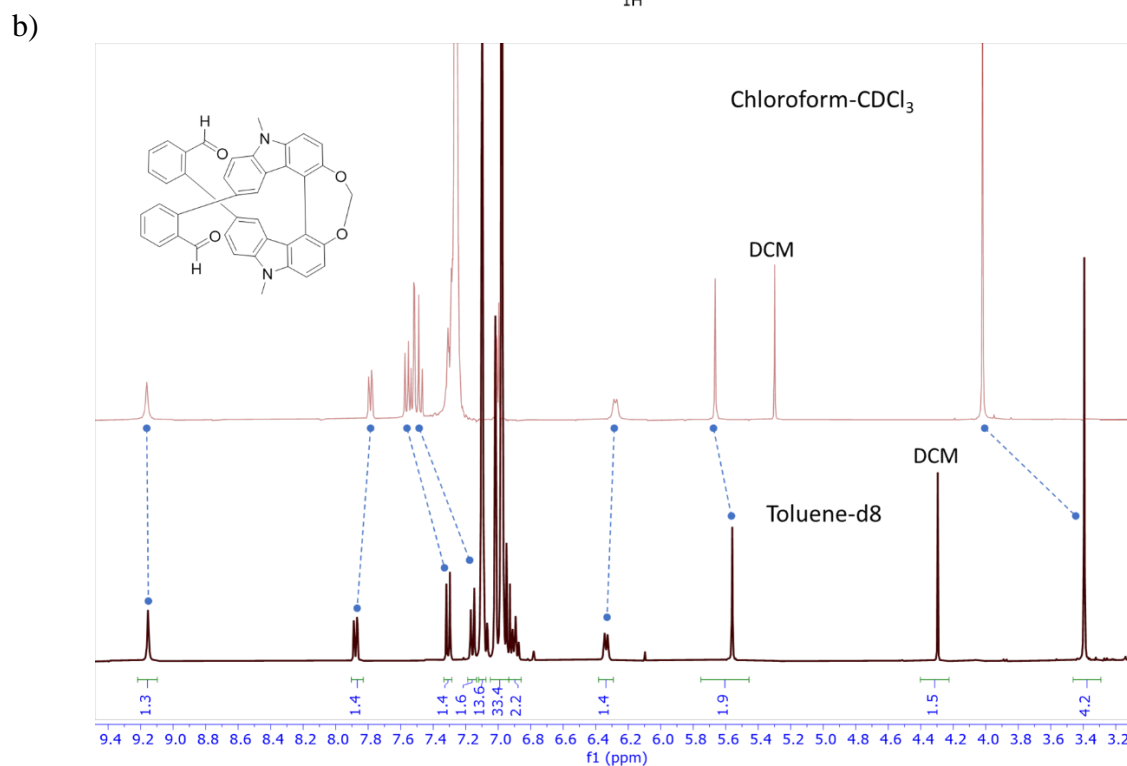

**Figure S1.** a):  $^1\text{H}$  NMR portion of **Ax-*o*-CHO**, **Hel-*o*-CHO** and **CBz-*o*-CHO** spectra showing the shielding of the aldehydic proton signal owing to the current ring effect induced by the opposite carbazole unit (not present on the model compound **CBz-*o*-CHO**). b):  $^1\text{H}$  NMR portion of **Hel-*o*-CHO** recorded in deuterated chloroform (red top spectrum) and toluene (brown bottom spectrum).

2-(6-methoxy-9-methyl-9H-carbazol-3-yl)benzaldehyde: **CBz-*o*-CHO**

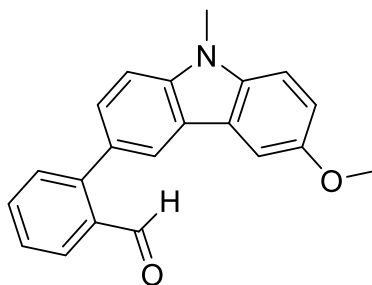

In a dried Schlenck, 3-iodo-6-methoxy carbazole (0.35 g, 1.038 mmol), 2-formylphenyl boronic acid (0.47 g, 3.115 mmol),  $K_2CO_3$  (0.60 g, 4.15 mmol) were dissolved in a mixture of DMF (15 mL) and water (5 mL) under argon. The mixture was degassed by argon bubbling for 15 minutes before  $Pd(dppf)Cl_2$  (0.1038 g, 0.07 mmol) was added and the resulting solution refluxed for 8 hours. After cooling down to room temperature, the reaction was poured into 20 mL of water and the organic layer was extracted 3 times with methylene chloride (3\*20 mL) and thus washed with brine (20 mL) and dried over  $MgSO_4$ . Solvents were removed under vacuum and the product was purified by chromatography (EtOAc/heptane, 25:75) to give white product 52%.

**$^1H$  NMR (400 MHz, methylene chloride- $d$  ( $CD_2Cl_2$ ))**  $\delta$  10.08 (s, 1H), 8.11 (d,  $J = 1.3$  Hz, 1H), 8.06 (dd,  $J = 7.8, 1.4$  Hz, 1H), 7.73 (td,  $J = 7.5, 1.5$  Hz, 1H), 7.67 – 7.63 (m, 2H), 7.54 (t,  $J = 2.2$  Hz, 3H), 7.42 (d,  $J = 8.9$  Hz, 1H), 7.20 (dd,  $J = 8.9, 2.5$  Hz, 1H), 3.95 (s, 3H), 3.92 (s, 3H).

**$^{13}C$  NMR (400 MHz, methylene chloride- $d$  ( $CD_2Cl_2$ ))**  $\delta$  192.6, 153.9, 146.9, 141.2, 136.6, 134.0, 133.3, 131.3, 127.8, 127.3, 127.0, 122.7, 122.5, 121.9, 115.4, 109.5, 108.5, 103.1, 55.9, 31.8, 29.2, 29.0, 22.6, 13.8.



### C. Steady-state photophysical and chiroptical characterizations

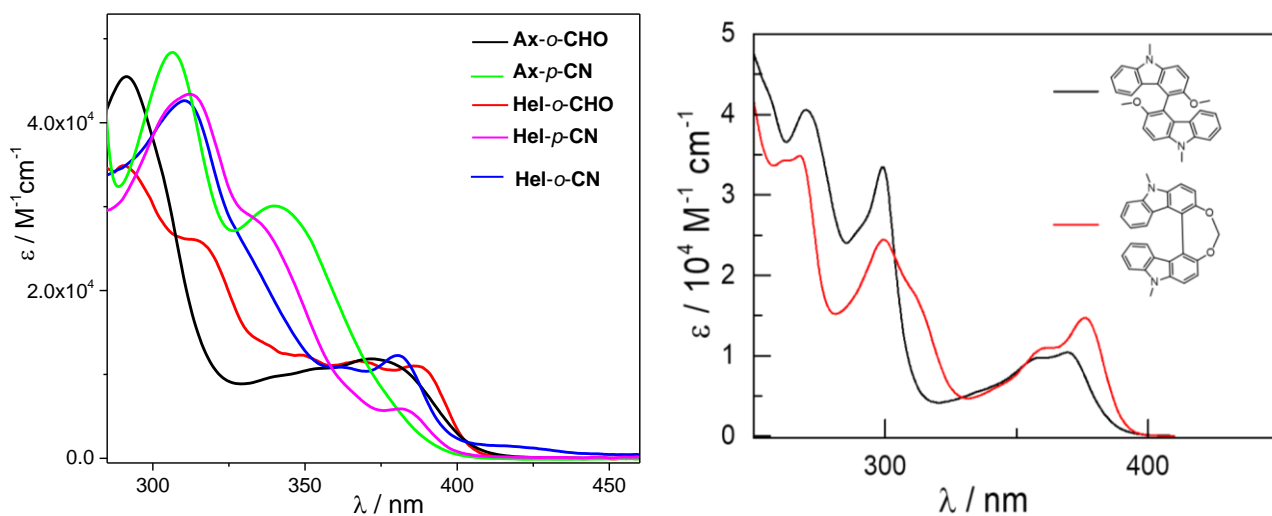

**Figure S2.** Left: UV-vis spectra of **Hel-o-CHO** (red), **Hel-o-CN** (blue), **Ax-o-CHO** (black), **Ax-p-CN** (green) and **Hel-p-CN** (purple) measured in toluene ( $\sim 10^{-5}$  M) at 298 K, and right: their corresponding bicarbazole precursors measured in chloroform ( $\sim 10^{-5}$  M) at 298 K.

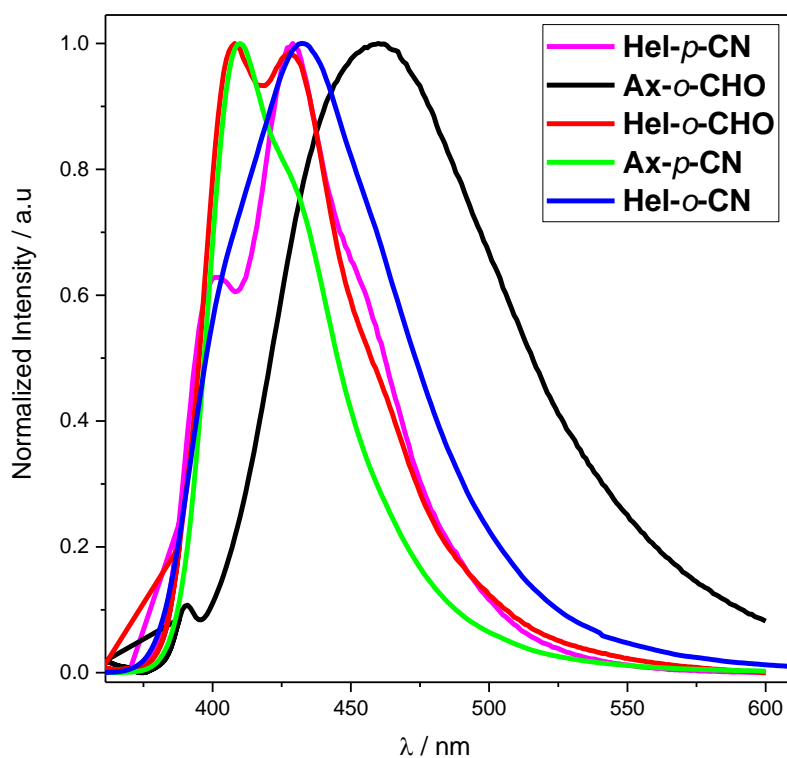

**Figure S3.** Normalized luminescence spectra of **Hel-o-CHO** (red), **Hel-o-CN** (blue), **Ax-o-CHO** (black), **Ax-p-CN** (green) and **Hel-p-CN** (purple) measured in toluene ( $\sim 10^{-5}$  M) at 298 K.

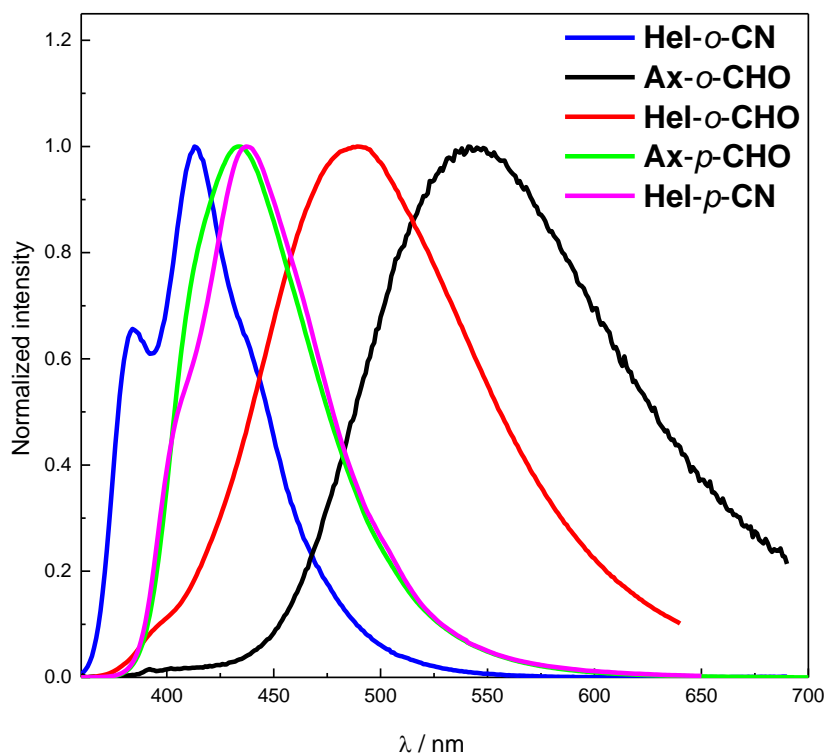

**Figure S4.** Normalized luminescence spectra of **Hel-*o*-CHO** (red), **Hel-*o*-CN** (blue), **Ax-*o*-CHO** (black), **Ax-*p*-CN** (green) and **Hel-*p*-CN** (purple) measured in chloroform ( $\sim 10^{-5}$  M) at 298 K.

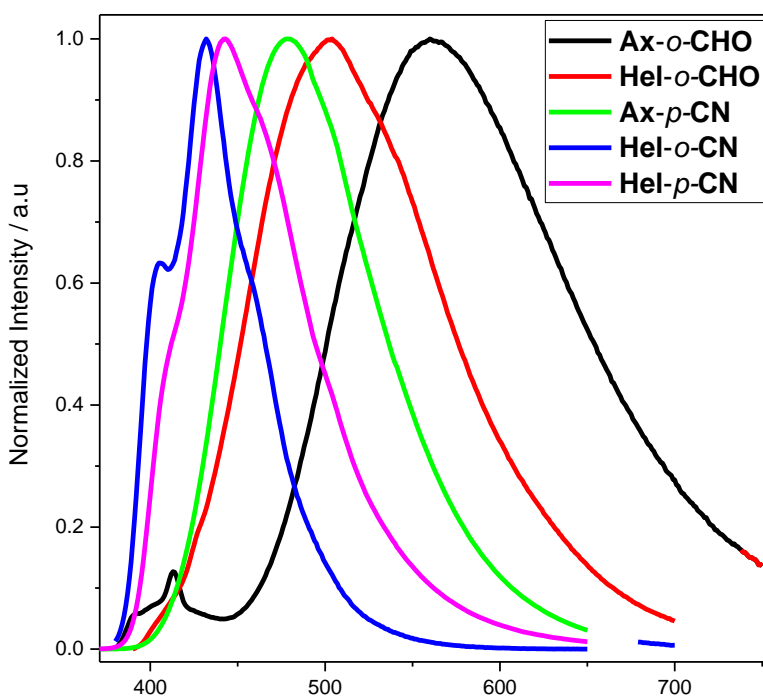

**Figure S5.** Normalized luminescence spectra of **Hel-*o*-CHO** (red), **Hel-*o*-CN** (blue), **Ax-*o*-CHO** (black), **Ax-*p*-CN** (green) and **Hel-*p*-CN** (purple) measured in dimethylformamide ( $\sim 10^{-5}$  M) at 298 K.

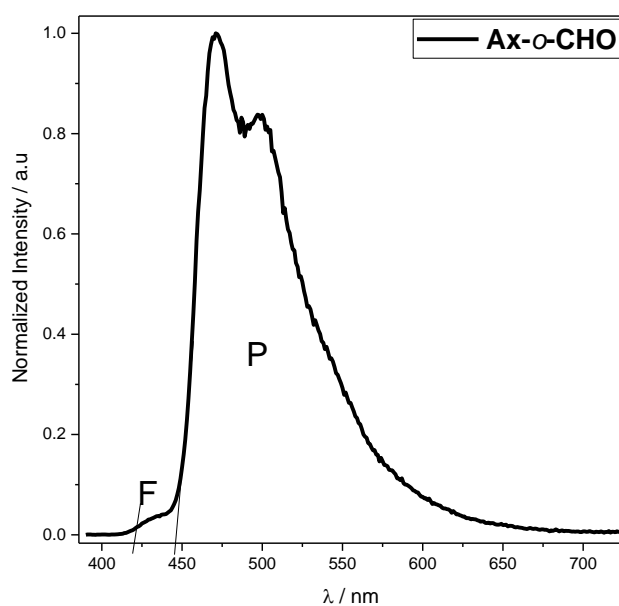

$$E_{(S1)} = 2.95 \text{ eV}$$

$$E_{(T1)} = 2.76 \text{ eV}$$

$$E_{(ST)} = 0.19 \text{ eV}$$

**Figure S6.** Normalized luminescence spectrum of **Ax-*o*-CHO** in 2-methyltetrahydrofuran at 77 K and excited at 375 nm (the onset of both fluorescence (F) and phosphorescence (P) emissions are taken to estimate the singlet and triplet energy levels).

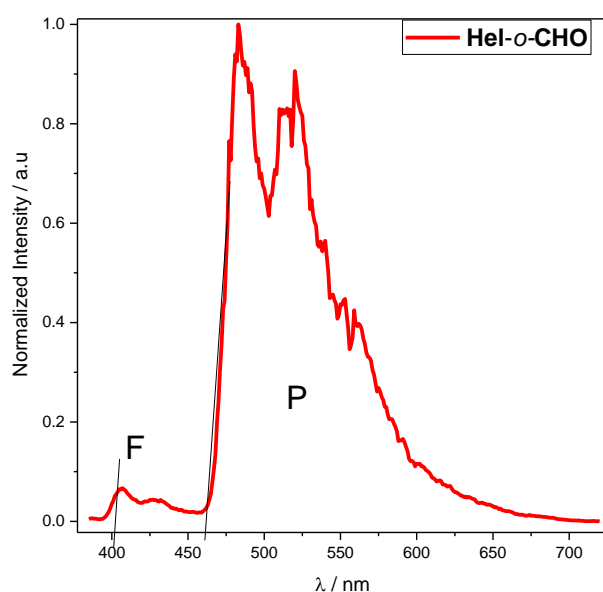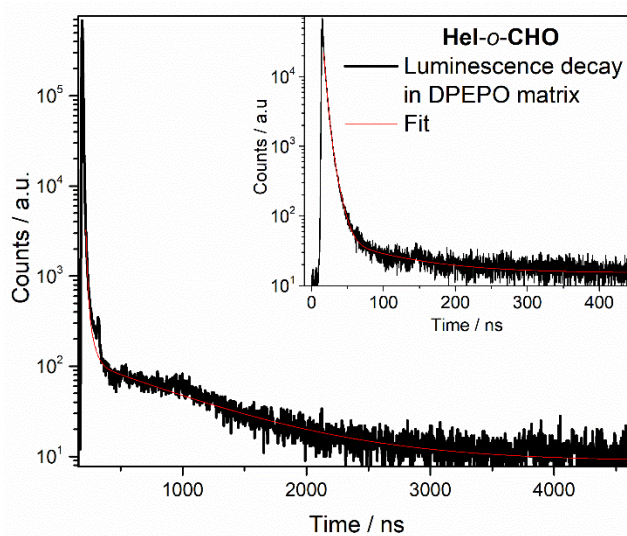

$$E_{(S1)} = 3.06 \text{ eV} / E_{(T1)} = 2.67 \text{ eV} / E_{(ST)} = 0.39 \text{ eV}$$

**Figure S7.** Left: Normalized luminescence spectrum of **Hel-*o*-CHO** in 2-methyltetrahydrofuran at 77 K and excited at 375 nm (the onset of both fluorescence (F) and phosphorescence (P) emissions are taken to estimate the singlet and triplet energy levels). Right: Luminescence decays of (+)-**Hel-*o*-CHO** (black signal, corresponding fits in red) recording under vacuum in solid matrix (bis[2-(diphenylphosphino)phenyl] ether oxide, DPEPO) with an inset focusing on the short lifetime decays.

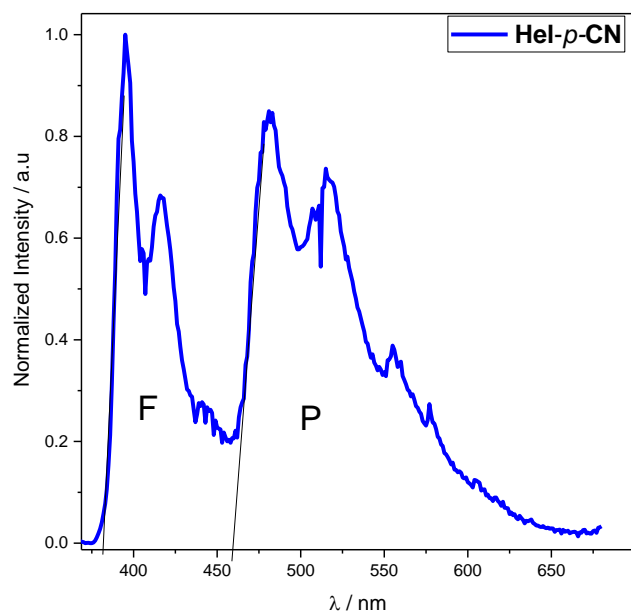

$$E_{(S1)} = 3.26\text{eV}$$

$$E_{(T1)} = 2.69\text{ eV}$$

$$E_{(ST)} = 0.57\text{ eV}$$

**Figure S8.** Normalized luminescence spectrum of **Hel-*o*-CN** in 2-methyltetrahydrofuran at 77 K and excited at 360 nm (the onset of both fluorescence (F) and phosphorescence (P) emissions are taken to estimate the singlet and triplet energy levels).

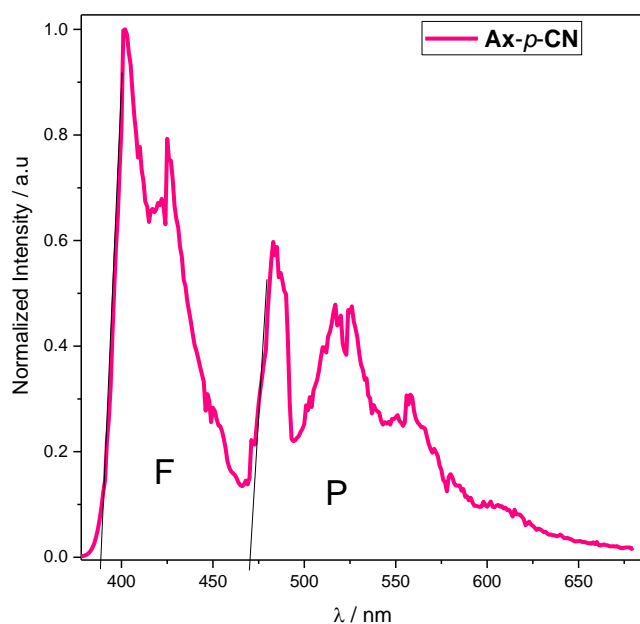

$$E_{(S1)} = 3.20\text{eV}$$

$$E_{(T1)} = 2.64\text{ eV}$$

$$E_{(ST)} = 0.54\text{ eV}$$

**Figure S9.** Normalized luminescence spectrum of **Ax-*p*-CN** in 2-methyltetrahydrofuran at 77 K and excited at 360 nm (the onset of both fluorescence (F) and phosphorescence (P) emissions are taken to estimate the singlet and triplet energy levels).

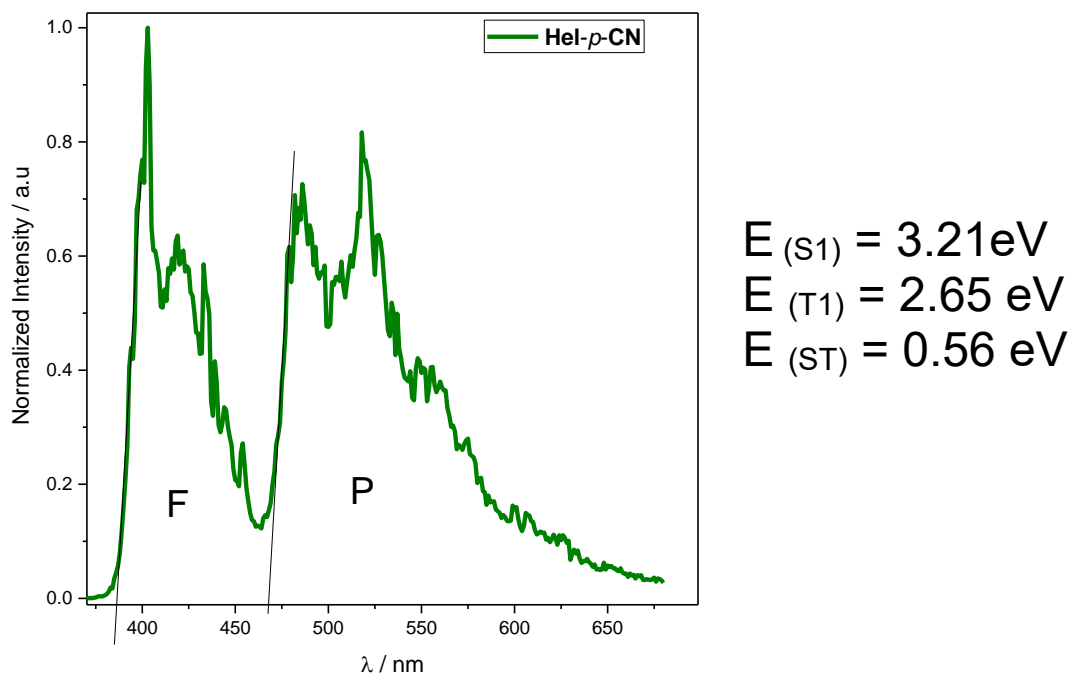

**Figure S10.** Normalized luminescence spectrum of **Hel-*p*-CN** in 2-methyltetrahydrofuran at 77 K and excited at 360 nm (the onset of both fluorescence (F) and phosphorescence (P) emissions are taken to estimate the singlet and triplet energy levels).

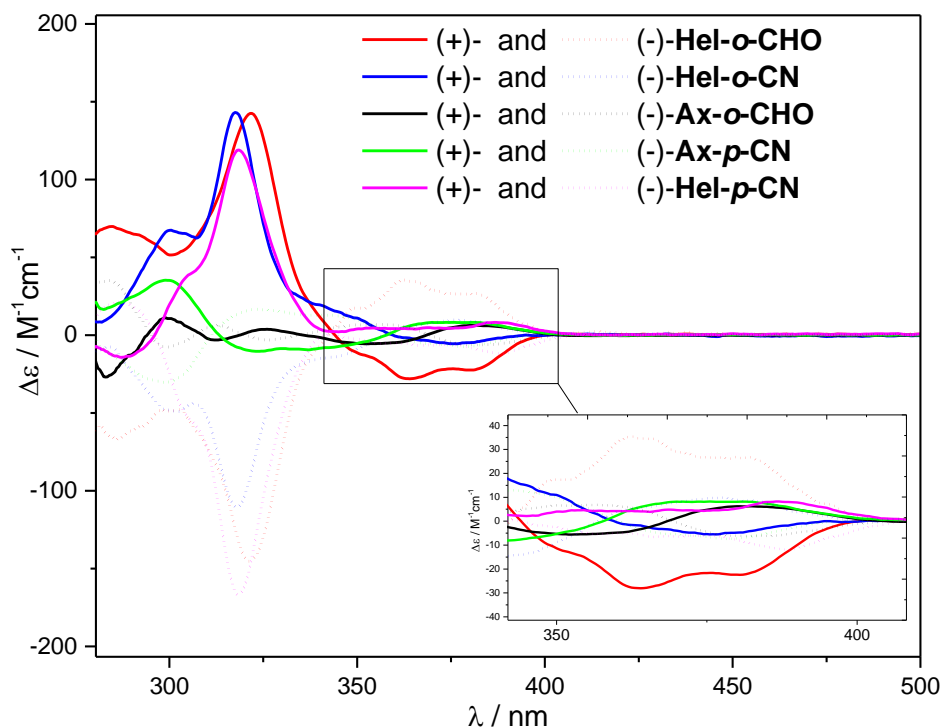

**Figure S11.** ECD spectra of **Hel-*o*-CHO** (red), **Hel-*o*-CN** (blue), **Ax-*o*-CHO** (black), **Ax-*p*-CN** (green) and **Hel-*p*-CN** (purple) measured in toluene ( $\sim 10^{-5}$  M) at 298 K.

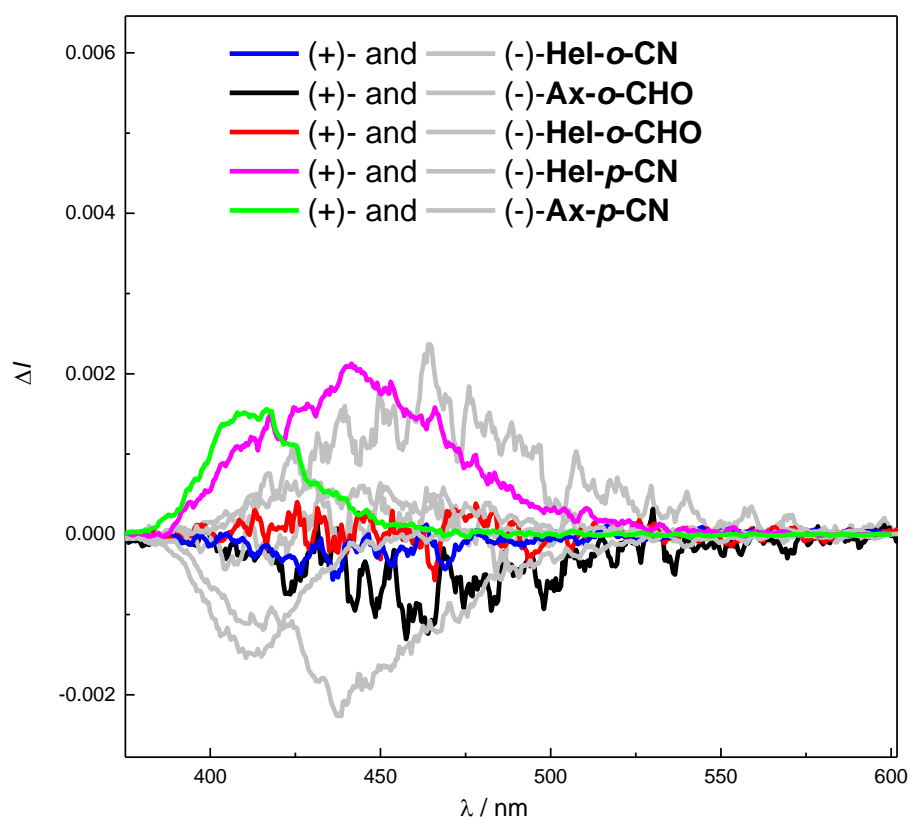

**Figure S12.** CPL spectra of **Hel-o-CHO** (red), **Hel-o-CN** (blue), **Ax-o-CHO** (black), **Ax-p-CN** (green) and **Hel-p-CN** (purple) measured in toluene ( $\sim 10^{-5}$  M) at 298 K.

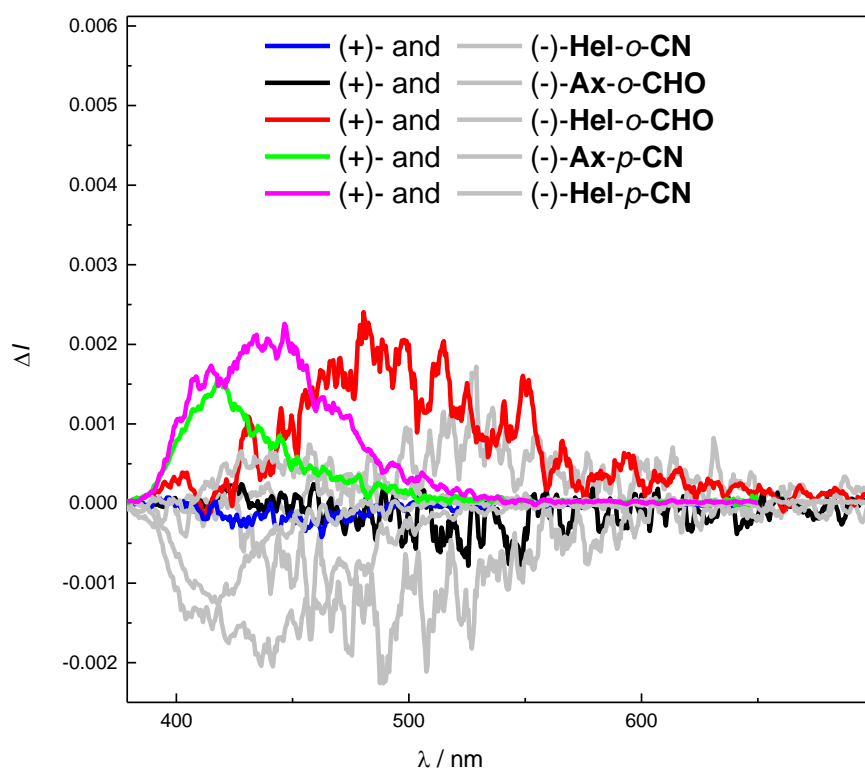

**Figure S13.** CPL spectra of **Hel-*o*-CHO** (red), **Hel-*o*-CN** (blue), **Ax-*o*-CHO** (black), **Ax-*p*-CN** (green) and **Hel-*p*-CN** (purple) measured in chloroform ( $\sim 10^{-5}$  M) at 298 K.

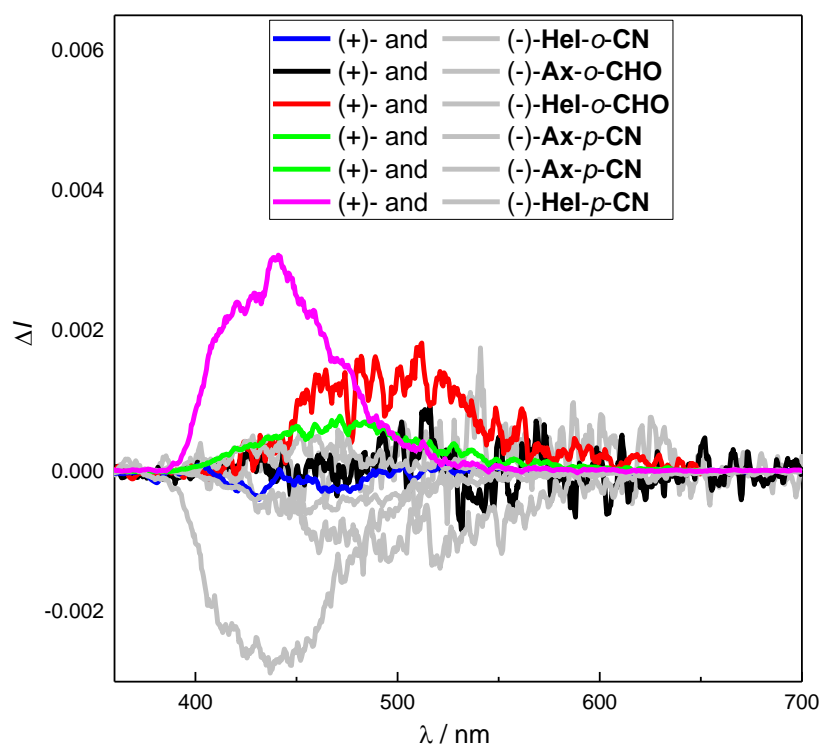

**Figure S14.** CPL spectra of **Hel-*o*-CHO** (red), **Hel-*o*-CN** (blue), **Ax-*o*-CHO** (black), **Ax-*p*-CN** (green) and **Hel-*p*-CN** (purple) measured in dimethylformamide ( $\sim 10^{-5}$  M) at 298 K.

**Table S1.** Summary of the photophysical and chiroptical data for **Hel-*o*-CHO**, **Hel-*o*-CN**, **Ax-*o*-CHO**, **Ax-*p*-CN** and **Hel-*p*-CN**.

| Compound                | $\lambda_{\text{abs Tol}}^{\text{a}}$<br>(onset<br>in nm) | $ \epsilon_{\text{Abs}} ^{\text{a}}$<br>Tol<br>( $\times 10^{-3}$ ) | $\lambda_{\text{em Tol}}$<br>(nm) /<br>$\phi_{\text{fluo}}^{\text{b}}$ (%) | $\lambda_{\text{em CHCl}_3}$<br>(nm) /<br>$\phi_{\text{fluo}}^{\text{b}}$ (%) | $\lambda_{\text{em DMF}}$<br>(nm) /<br>$\phi_{\text{fluo}}^{\text{b}}$ (%) | $\tau_{\text{Fluo}}^{\text{c}}$ [ns]      | $ \epsilon_{\text{lum}} $<br>( $\times 10^{-3}$ ) |                   |     |
|-------------------------|-----------------------------------------------------------|---------------------------------------------------------------------|----------------------------------------------------------------------------|-------------------------------------------------------------------------------|----------------------------------------------------------------------------|-------------------------------------------|---------------------------------------------------|-------------------|-----|
|                         |                                                           |                                                                     |                                                                            |                                                                               |                                                                            |                                           | Tol                                               | CHCl <sub>3</sub> | DMF |
| <b>Hel-<i>o</i>-CHO</b> | 410                                                       | 0.0                                                                 | 439 / 2                                                                    | 477 / 7                                                                       | 490 / 6                                                                    | 2.6 / 10.8<br>(8 / 36 / 804) <sup>d</sup> | ~ 0.0                                             | 2.0               | 1.6 |
| <b>Hel-<i>o</i>-CN</b>  | 375                                                       | 0.6                                                                 | 435 / 20                                                                   | 435 / 10                                                                      | 455 / 13                                                                   | 4.0                                       | 0.5                                               | 0.5               | 0.4 |
| <b>Hel-<i>p</i>-CN</b>  | 401                                                       | 2.0                                                                 | 438 / 17                                                                   | 438 / 15                                                                      | 444 / 20                                                                   | 2.7                                       | 2.5                                               | 2.5               | 3.0 |
| <b>Ax-<i>o</i>-CHO</b>  | 415                                                       | 1.0                                                                 | 460 / 3                                                                    | 531 / 4                                                                       | 543 / 2                                                                    | 3.1<br>(8.4 / 71/<br>1040) <sup>d</sup>   | 1.0                                               | 0.7               | 0.5 |
| <b>Ax-<i>p</i>-CN</b>   | 390                                                       | 2.2                                                                 | 412 / 25                                                                   | 436 / 37                                                                      | 461 / 84                                                                   | 3.8                                       | 1.5                                               | 1.4               | 1.1 |

<sup>a</sup> In toluene solution. <sup>b</sup> Absolute quantum yield (error  $\pm 10\%$ ), measured using an integrating sphere (Tol for toluene, CHCl<sub>3</sub> for chloroform and DMF for dimethylformamide). <sup>c</sup> Fluorescence lifetime measured in dichloromethane solution (error  $\pm 5\%$ ) and weight in parenthesis. <sup>d</sup> Lifetimes measured in DPEPO matrix.

**Table S2.** Electrochemical data for **Hel-*o*-CHO**, **Hel-*o*-CN**, **Ax-*o*-CHO**, **Ax-*p*-CN** and **Hel-*p*-CN**. The redox potentials are referenced *versus* saturated calomel electrode (SCE) and given in V with Fc/Fc<sup>+</sup> as an internal reference and 0.1 M Bu<sub>4</sub>NPF<sub>6</sub> in dichloromethane as the electrolyte.

| Compound                          | <b>Hel-<i>o</i>-CHO</b> | <b>Hel-<i>o</i>-CN</b> | <b>Hel-<i>p</i>-CN</b> | <b>Ax-<i>o</i>-CHO</b> | <b>Ax-<i>p</i>-CN</b> |
|-----------------------------------|-------------------------|------------------------|------------------------|------------------------|-----------------------|
| <b>E<sup>1</sup><sub>ox</sub></b> | 1.17                    | 1.21                   | 1.21                   | 0.95                   | 0.98                  |
| <b>E<sup>2</sup><sub>ox</sub></b> | 1.39                    | 1.39                   | 1.19                   | 1.19                   | 1.19                  |

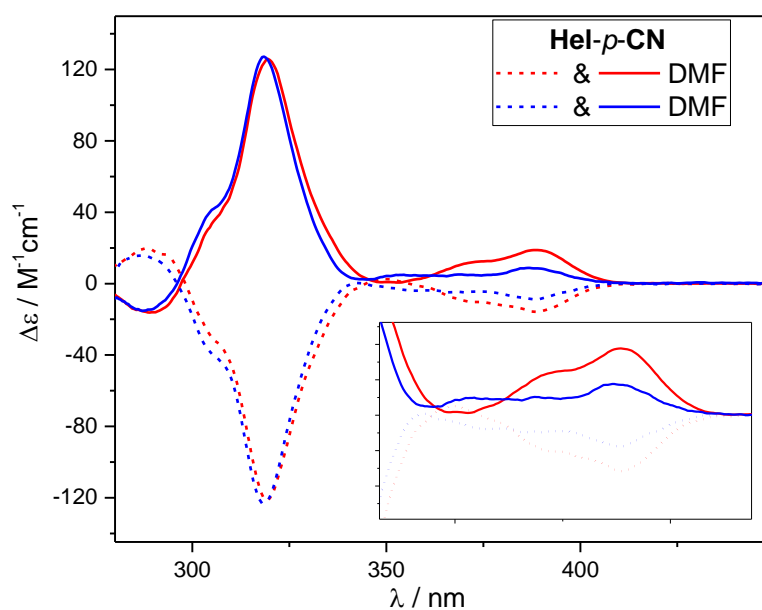

**Figure S15.** ECD spectra of (+)-**Hel-*p*-CN** (solid lines) and (-)-**Hel-*p*-CN** (dashed lines) in toluene (blue) and in dimethylformamide (red) ( $\sim 10^{-5}$  M) at 298 K.



## D. X-Ray experimental data

|                                            |                                                                                  |
|--------------------------------------------|----------------------------------------------------------------------------------|
| Empirical formula                          | C <sub>43</sub> H <sub>33</sub> C <sub>13</sub> N <sub>2</sub> O <sub>4</sub>    |
| CCDC number                                | 2085967                                                                          |
| Extended formula                           | C <sub>42</sub> H <sub>32</sub> N <sub>2</sub> O <sub>4</sub> ;CHCl <sub>3</sub> |
| Formula weight                             | 748.06 g/mol                                                                     |
| Temperature                                | 150(2) K                                                                         |
| Radiation type                             | Mo-K <sub>α</sub>                                                                |
| Wavelength                                 | 0.71073 Å                                                                        |
| Crystal system, space group                | triclinic, P 1                                                                   |
| Unit cell dimensions                       | a = 8.9208 (12) Å                                                                |
|                                            | b = 13.4572 (16) Å                                                               |
|                                            | c = 15.7062 (19) Å                                                               |
|                                            | α = 107.913 (4) °                                                                |
|                                            | β = 91.259 (5) °                                                                 |
|                                            | γ = 95.152 (4) °                                                                 |
| Volume                                     | 1784.4(4) Å <sup>3</sup>                                                         |
| Z, Calculated density                      | 2, 1.392 g.cm <sup>-3</sup>                                                      |
| Absorption coefficient                     | 0.305 mm <sup>-1</sup>                                                           |
| F(000)                                     | 776                                                                              |
| Crystal size                               | 0.550 x 0.350 x 0.210 mm                                                         |
| Crystal color                              | yellow                                                                           |
| Crystal description                        | prism                                                                            |
| Diffractometer                             | APEXII Kappa-CCD diffractometer                                                  |
|                                            | θ range for data collection 2.403 to 27.538°                                     |
| (sinθ=λ) <sub>max</sub> (Å <sup>-1</sup> ) | 0.651                                                                            |
| h <sub>min</sub> , h <sub>max</sub>        | -11, 11                                                                          |
| k <sub>min</sub> , k <sub>max</sub>        | -12, 17                                                                          |
| l <sub>min</sub> , l <sub>max</sub>        | -20, 19                                                                          |
| Reflections collected / unique             | 29926 / 8200 [ <sup>a</sup> R(int) = 0.0439]                                     |
| Reflections [I > 2σ]                       | 6634                                                                             |
| Completeness to θ max                      | 0.994                                                                            |
| Absorption correction type                 | multi-scan                                                                       |
| Max. and min. transmission                 | 0.938, 0.890                                                                     |
| Refinement method                          | Full-matrix least-squares on F <sup>2</sup>                                      |
| H-atom treatment                           | H-atom parameters constrained                                                    |
| Data / restraints / parameters             | 8200 / 0 / 473                                                                   |
| <sup>b</sup> Goodness-of-fit               | 0.992                                                                            |
| Final R indices [I > 2σ]                   | <sup>c</sup> R1 = 0.0402, <sup>d</sup> wR2 = 0.1117                              |
| R indices (all data)                       | <sup>c</sup> R1 = 0.0529, <sup>d</sup> wR2 = 0.1231                              |
| Δρ <sub>max</sub> , Δρ <sub>min</sub>      | 0.459, -0.593 e.Å <sup>-3</sup>                                                  |

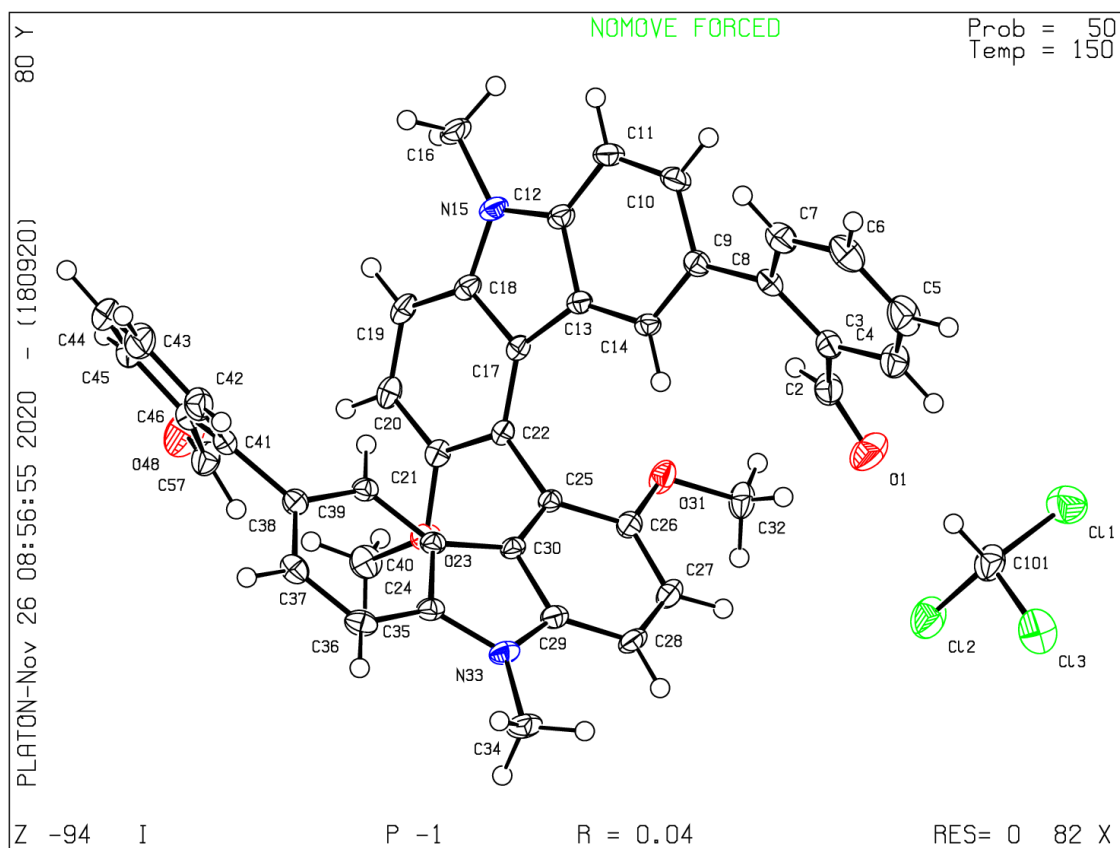

**Figure S16.** ORTEP diagrams of compound **Ax-o-CHO** with ellipsoids at 50% probability) at 150 K.

## E. HPLC separation

| Conditions Analytiques :    |                                |         |  |
|-----------------------------|--------------------------------|---------|--|
| Colonne :                   | CHIRALPAK IG 250 x 4,6 mm, 5µm |         |  |
| Débit :                     | 4 mL/min                       |         |  |
| Détection :                 | 200-400 nM MaxAbs              |         |  |
| température<br>pression BPR | 40°C - 120bars                 |         |  |
| Solvant :                   | A : CO2                        |         |  |
|                             | B : i-PrOH                     |         |  |
| Gradient :                  | Isocratique                    |         |  |
|                             | %A : 65                        | %B : 35 |  |

Date : 03/05/2021  
 Opérateur : LEBREQUIER Sabrina  
 Demandeur : PIETERS Grégory  
 Encadrant : PIETERS Grégory

| Conditions Prep :           |                               |         |  |
|-----------------------------|-------------------------------|---------|--|
| Colonne :                   | CHIRALPAK IG 250 x 21 mm, 5µm |         |  |
| Débit :                     | 80 mL/min                     |         |  |
| Détection :                 | 200-400 nM MaxAbs             |         |  |
| température<br>pression BPR | 40°C - 100 bars               |         |  |
| Solvant :                   | A : CO2                       |         |  |
|                             | B : i-PrOH                    |         |  |
| Gradient :                  | Isocratique                   |         |  |
|                             | %A : 65                       | %B : 35 |  |

### Profil de purification :

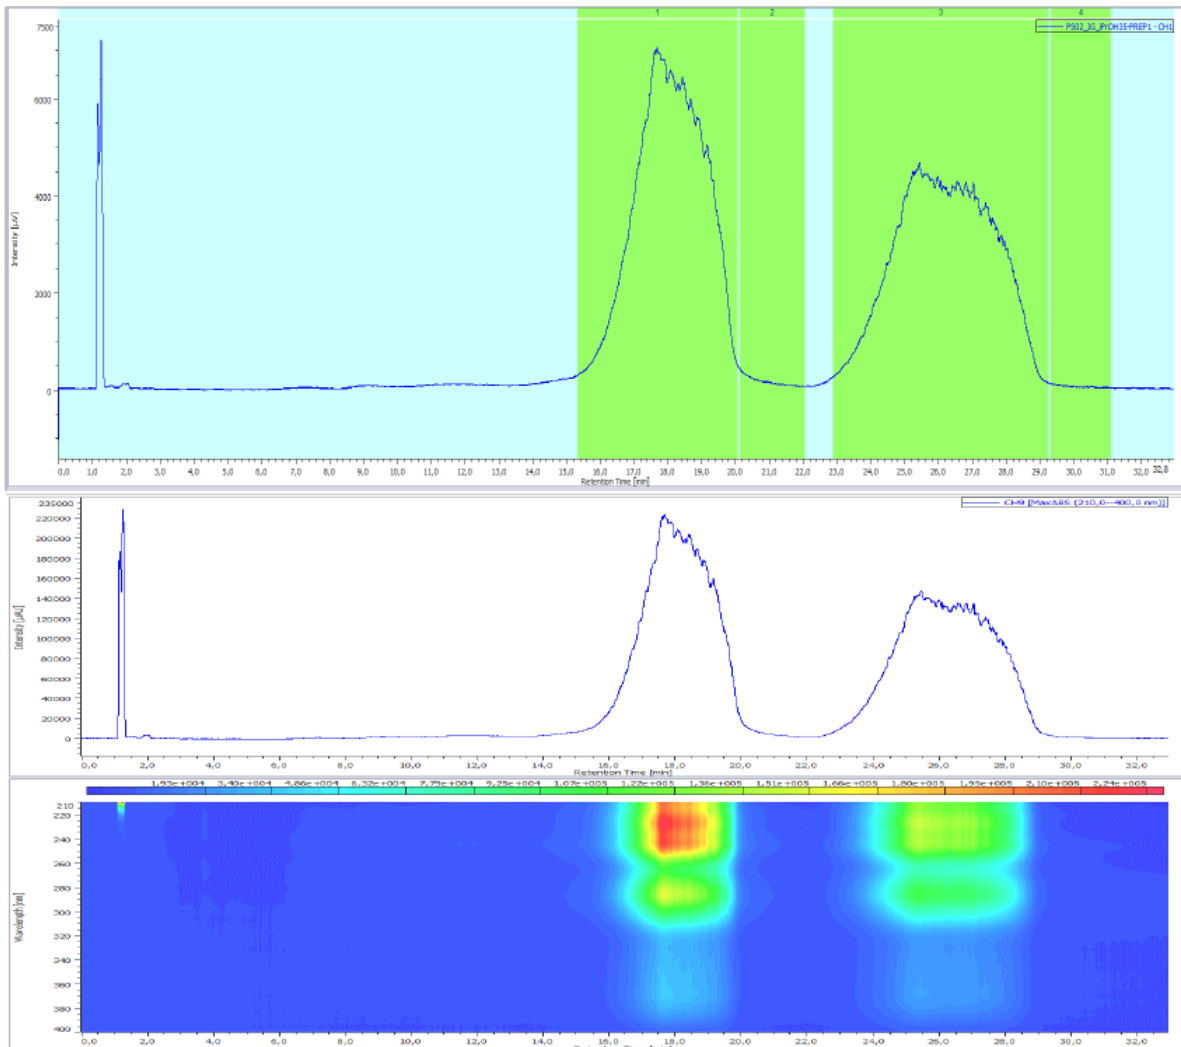

Conditions analytiques : Racémique avant purification :

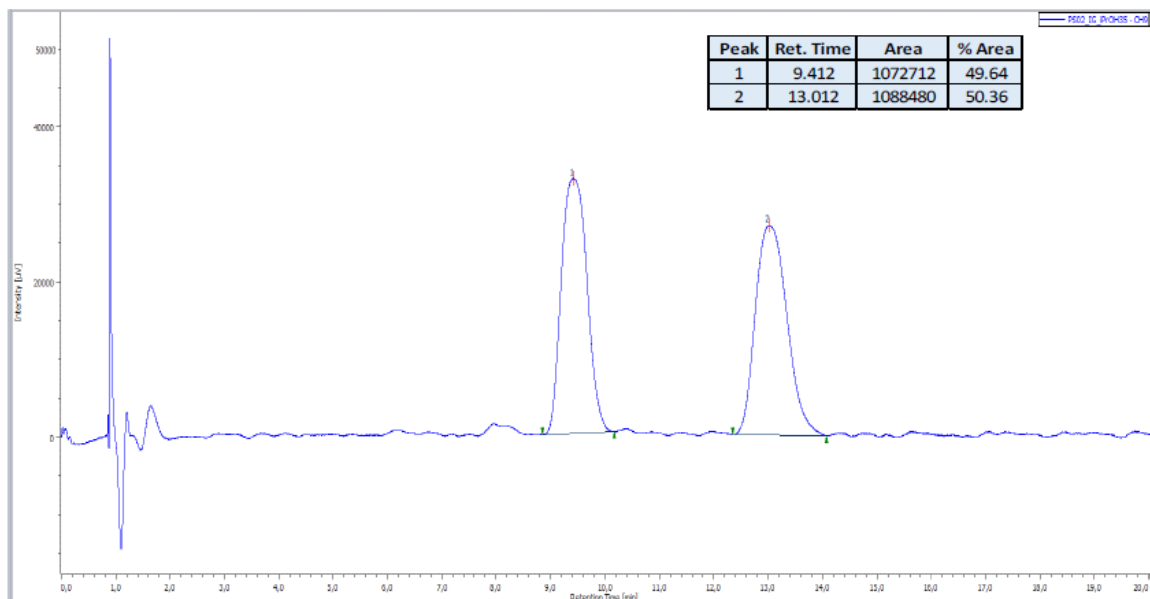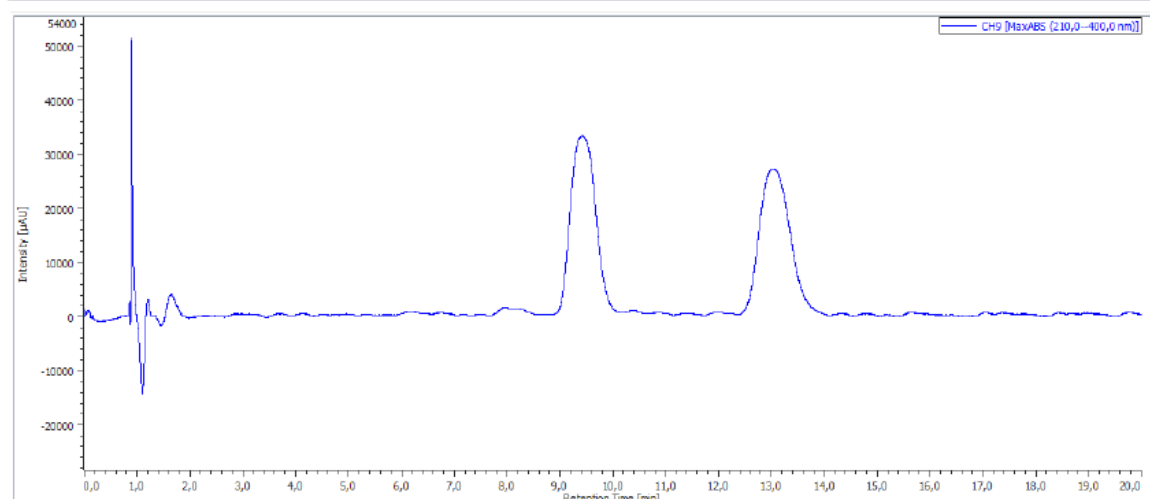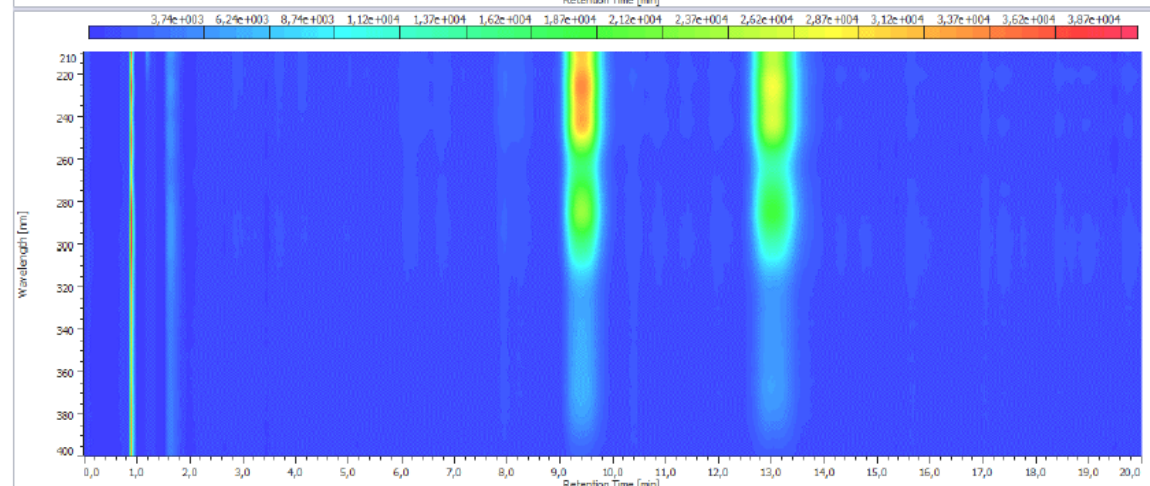

## Vérification des énantiomères

E1

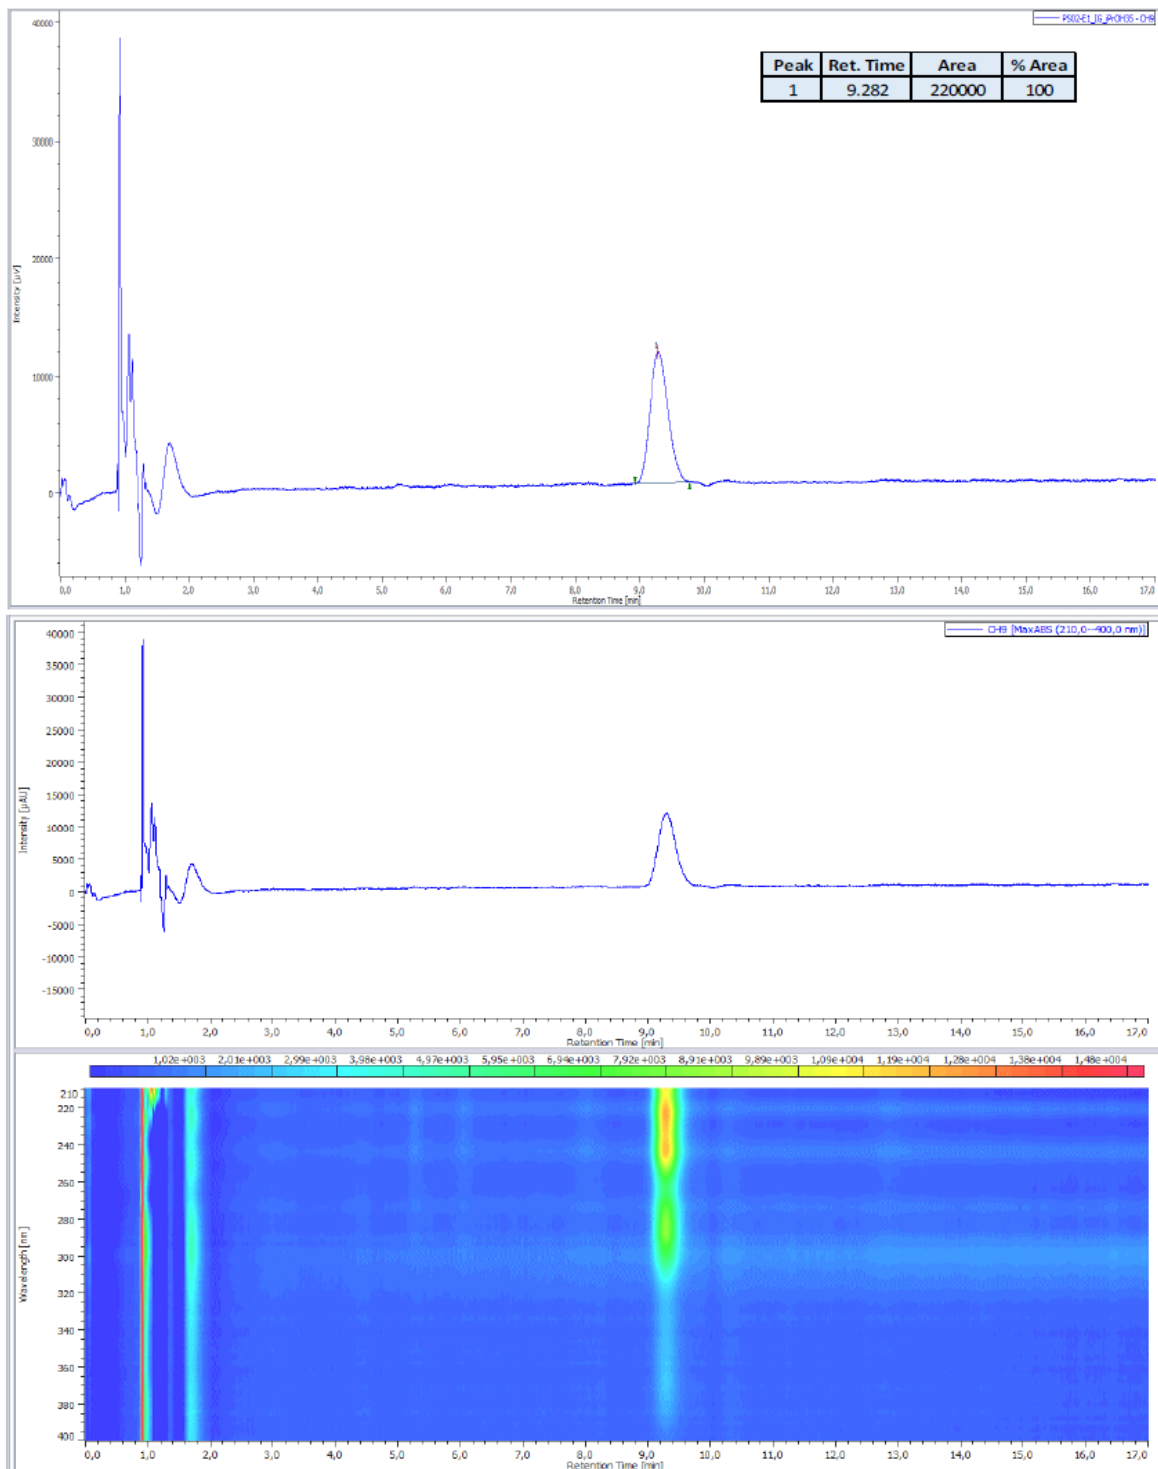

E2

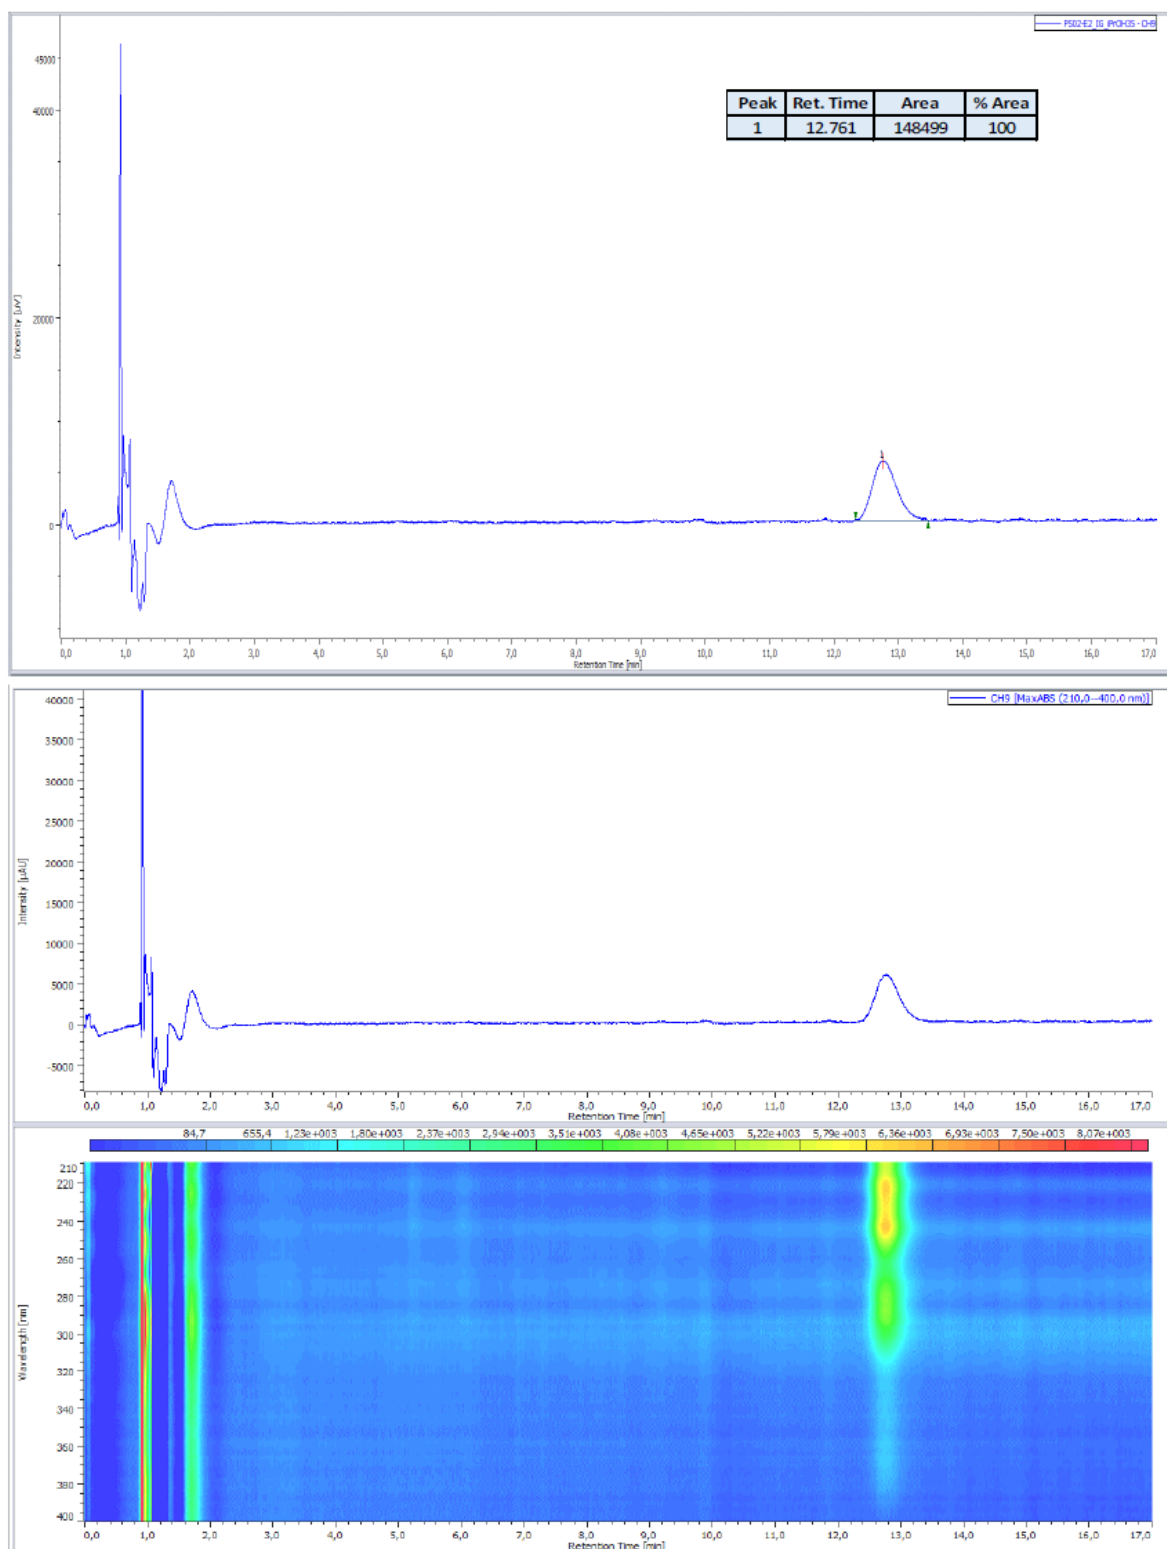

Figure S17. Chiral HPLC of Ax-*o*-CHO.

Date : 17/05/2021  
 Opérateur : LEBREQUIER Sabrina  
 Demandeur : PIETERS Grégory  
 Encadrant : PIETERS Grégory

| Conditions Analytiques : |                                |
|--------------------------|--------------------------------|
| Colonne :                | CHIRALPAK IG 250 x 4,6 mm, 5µm |
| Débit :                  | 4 mL/min                       |
| Détection :              | 200-400 nM MaxAbs              |
| température pression BPR | 40°C - 120bars                 |
| Solvant :                | A : CO2                        |
|                          | B : i-PrOH                     |
| Gradient :               | Isocratique                    |
|                          | %A : 55    %B : 45             |

| Conditions Prep :        |                               |
|--------------------------|-------------------------------|
| Colonne :                | CHIRALPAK IG 250 x 21 mm, 5µm |
| Débit :                  | 80 mL/min                     |
| Détection :              | 200-400 nM MaxAbs             |
| température pression BPR | 40°C - 100 bars               |
| Solvant :                | A : CO2                       |
|                          | B : i-PrOH                    |
| Gradient :               | Isocratique                   |
|                          | %A : 55    %B : 45            |

**Profil de purification :**

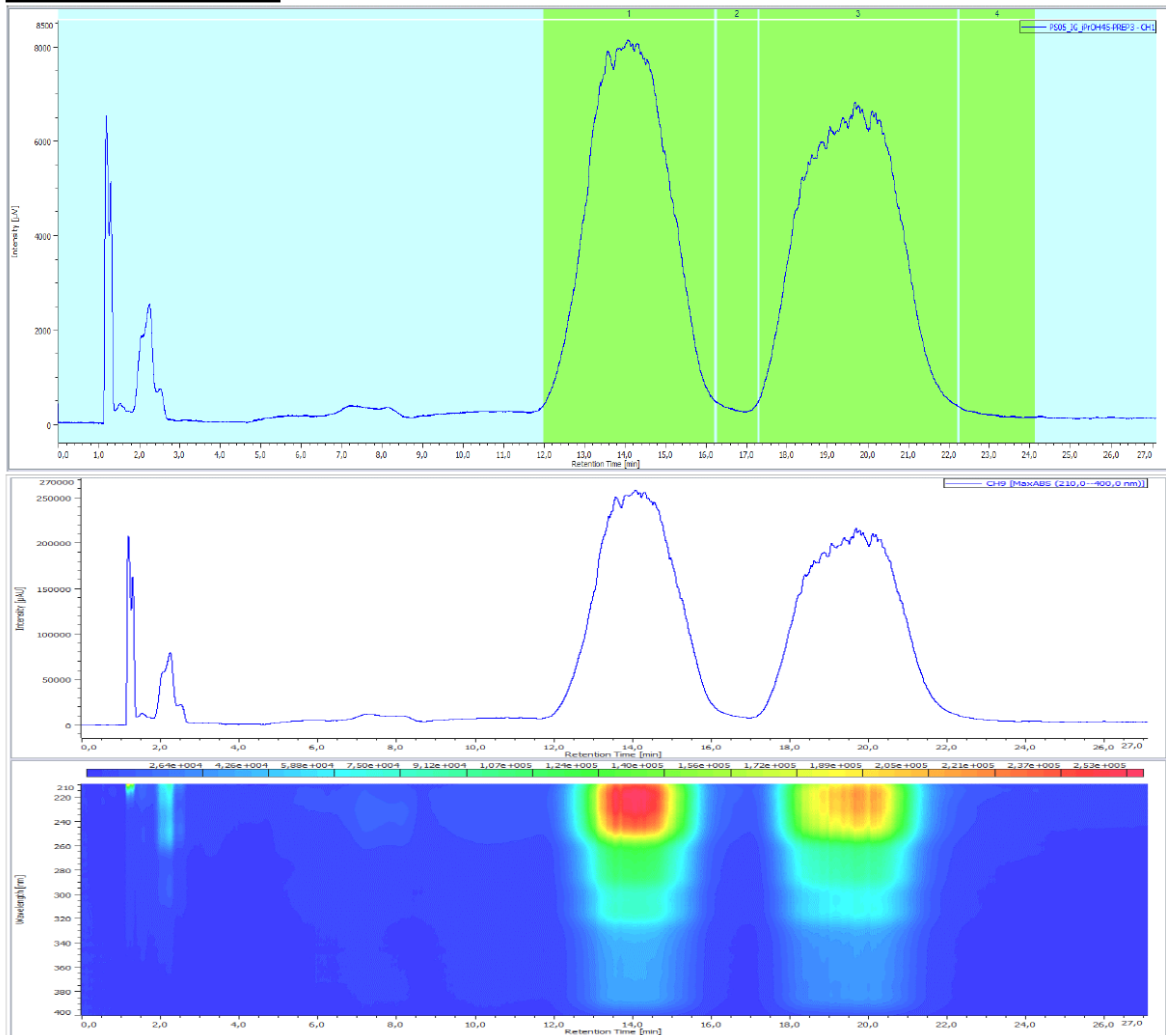

Conditions analytiques : Racémique avant purification :

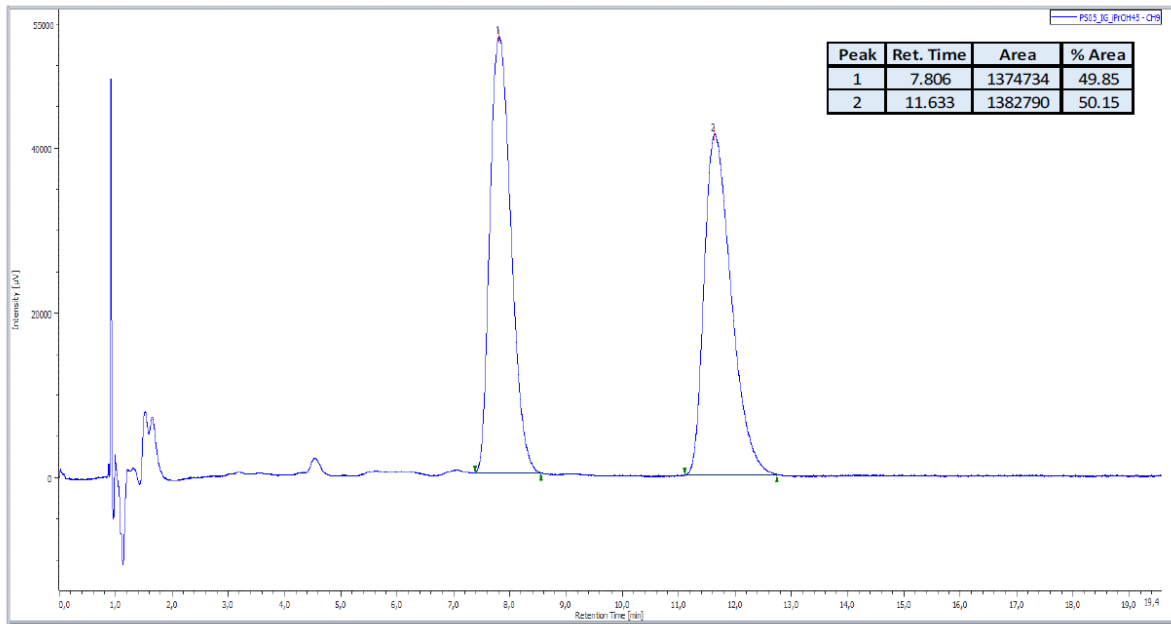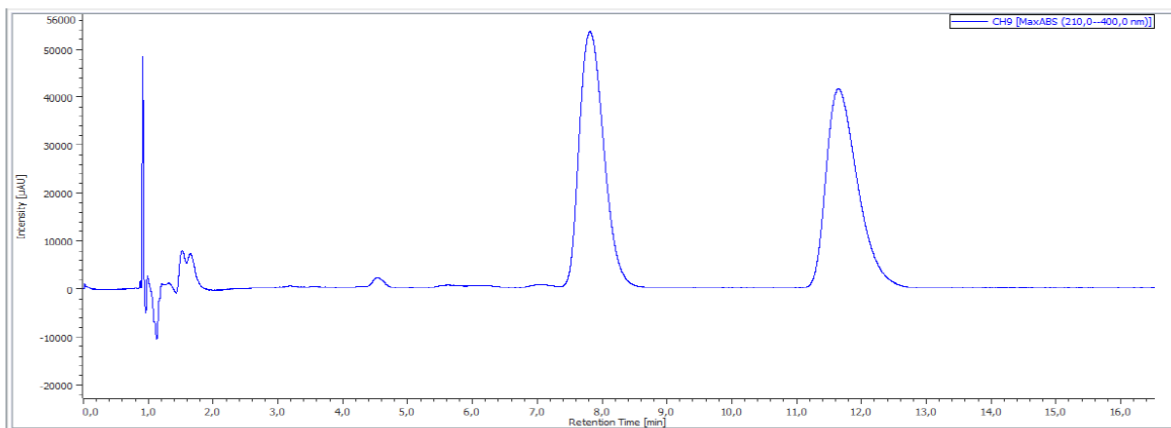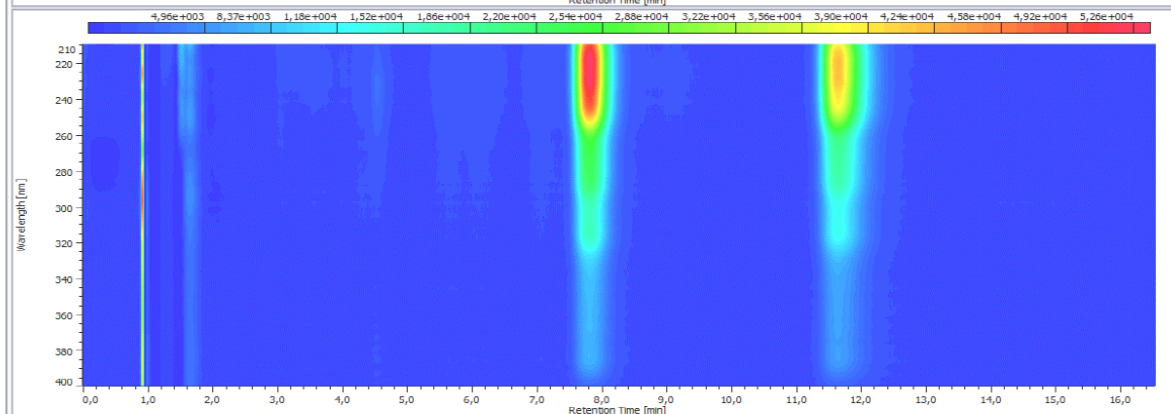



## Vérification des énantiomères

E1

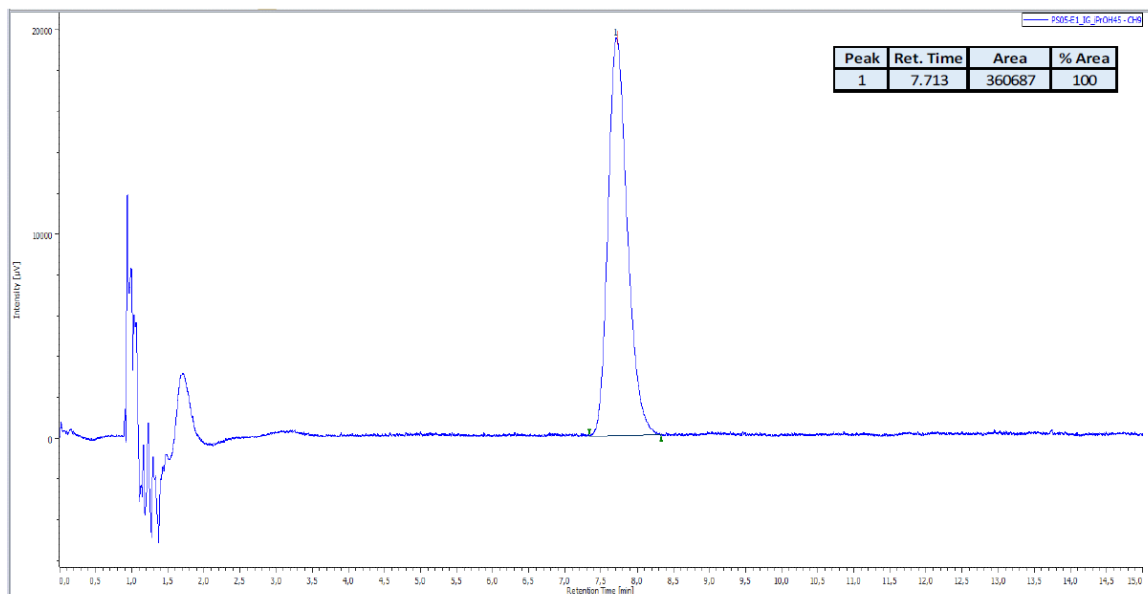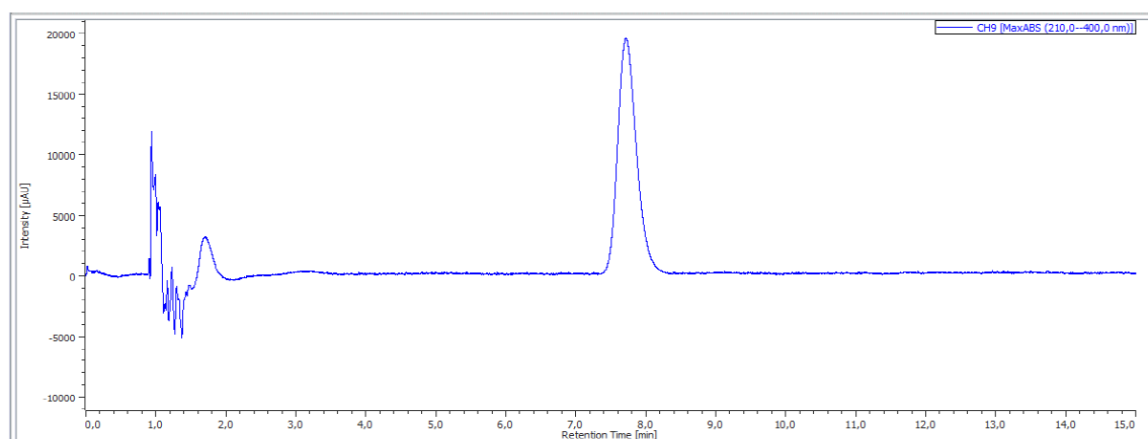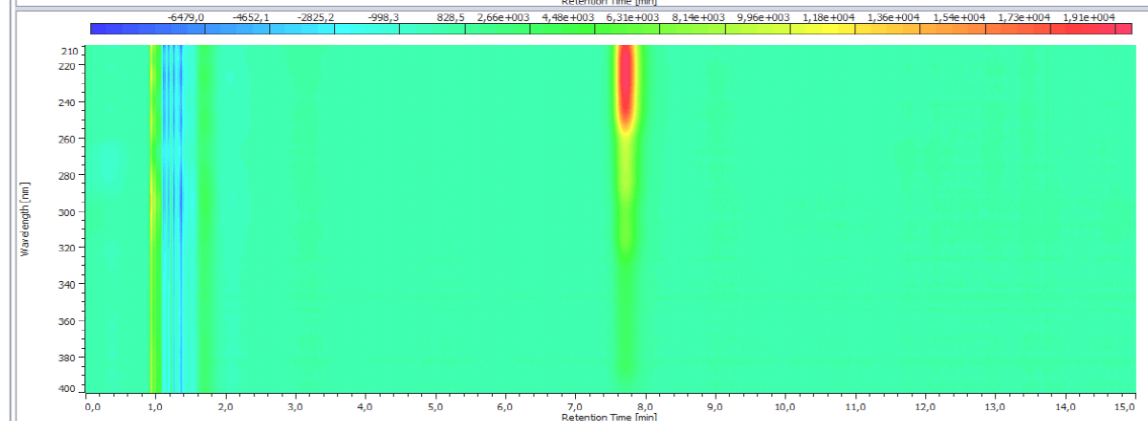

E2

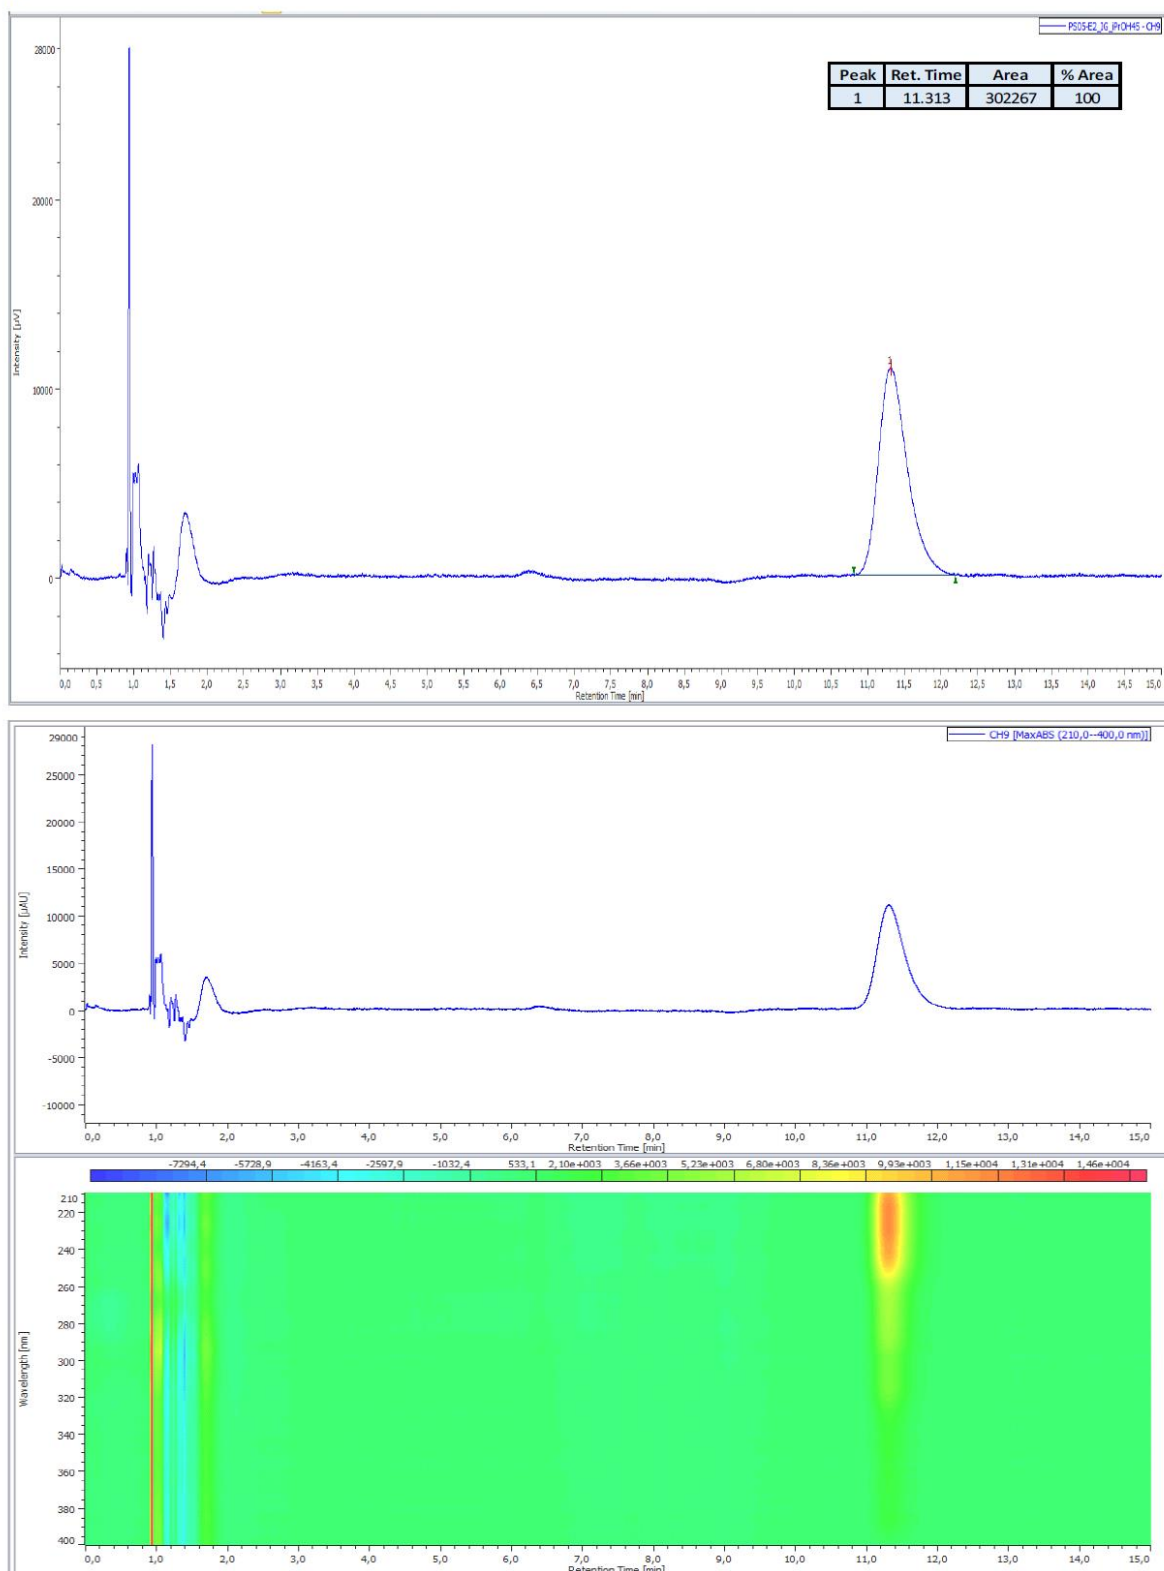

Figure S18. Chiral HPLC of Hel-*o*-CHO.

| Conditions Analytiques : |                                |
|--------------------------|--------------------------------|
| Colonne :                | CHIRALPAK IG 250 x 4,6 mm, 5µm |
| Débit :                  | 4 mL/min                       |
| Détection :              | 200-400 nM MaxAbs              |
| température pression BPR | 40°C - 120bars                 |
| Solvant :                | A : CO2                        |
|                          | B : i-PrOH/DCM 20/20           |
| Gradient :               | Isocratique                    |
|                          | %A : 60      %B : 40           |

Date : 17/05/2021  
 Opérateur : LEBREQUIER Sabrina  
 Demandeur : PIETERS Grégory  
 Encadrant : PIETERS Grégory

| Conditions Prep :        |                               |
|--------------------------|-------------------------------|
| Colonne :                | CHIRALPAK IG 250 x 21 mm, 5µm |
| Débit :                  | 80 mL/min                     |
| Détection :              | 200-400 nM MaxAbs             |
| température pression BPR | 40°C - 100 bars               |
| Solvant :                | A : CO2                       |
|                          | B : i-PrOH/DCM 20/20          |
| Gradient :               | Isocratique                   |
|                          | %A : 60      %B : 40          |

**Profil de purification :**

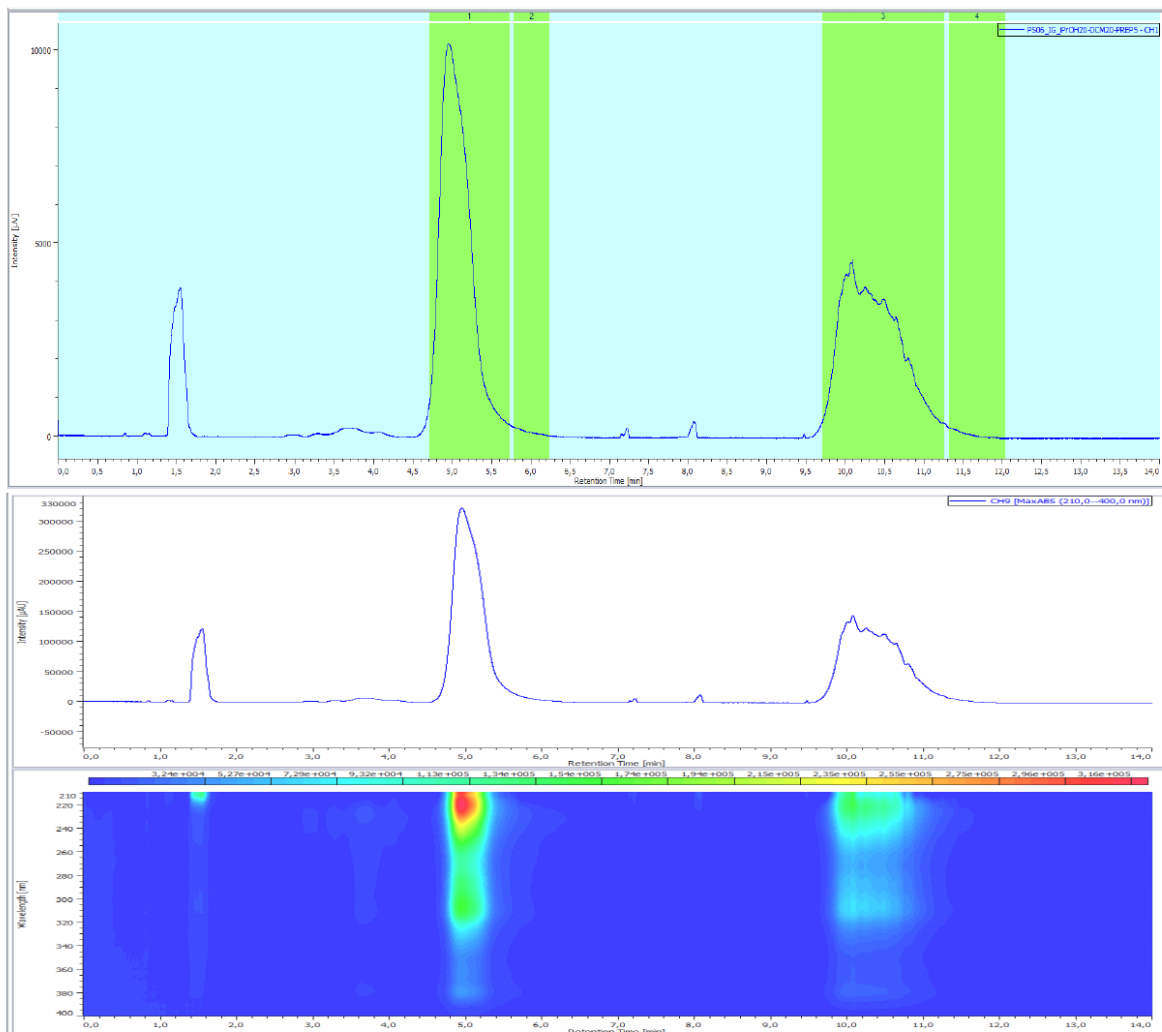

Conditions analytiques : Racémique avant purification :

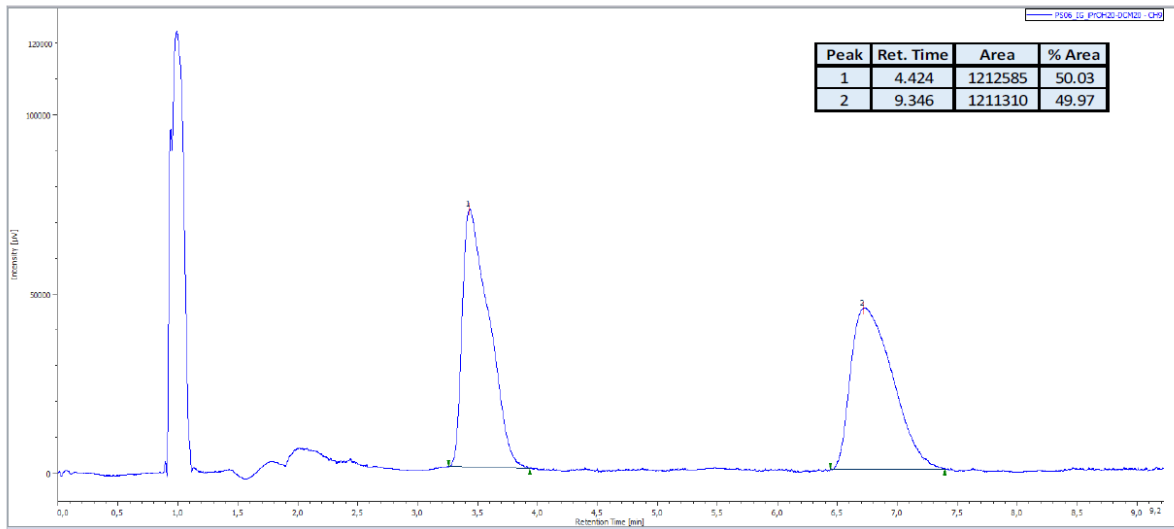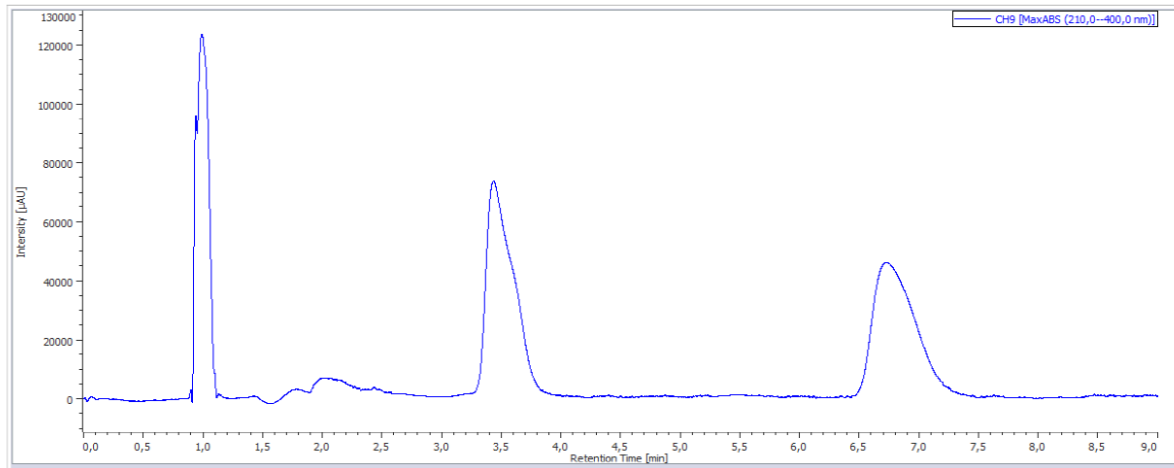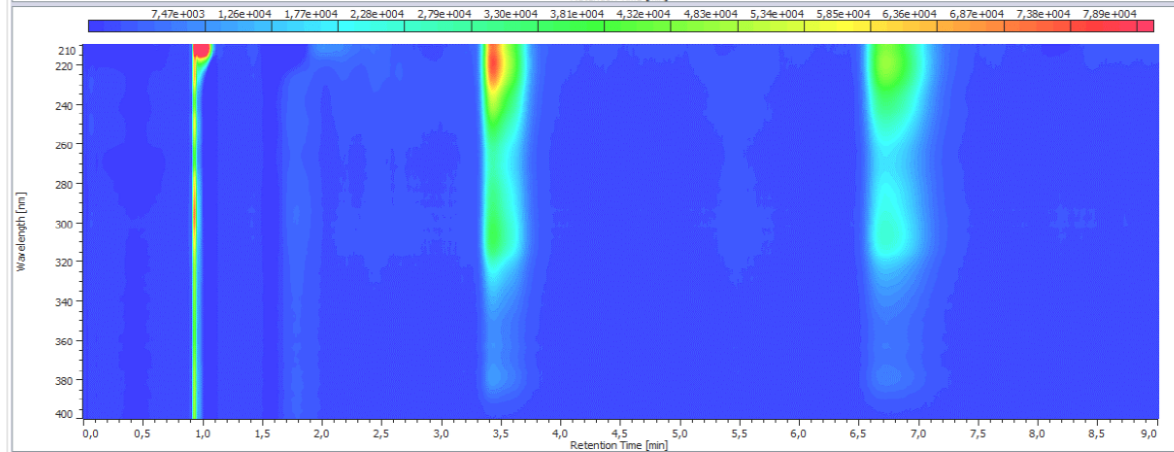

# Vérification des énantiomères

E1

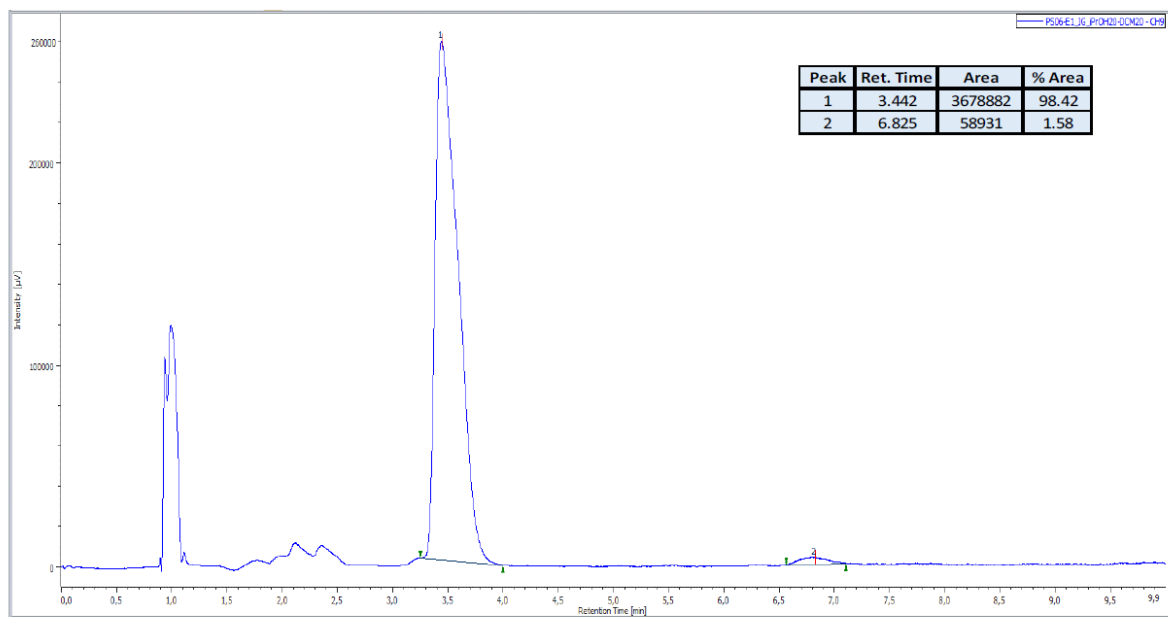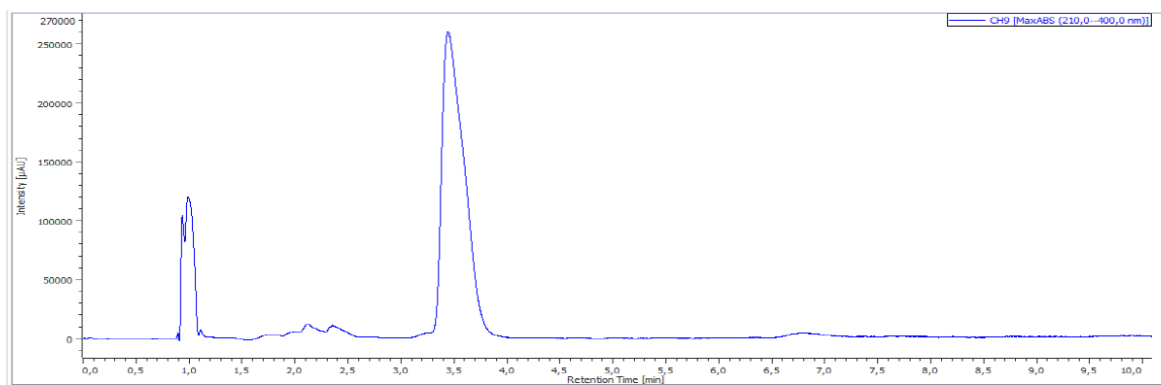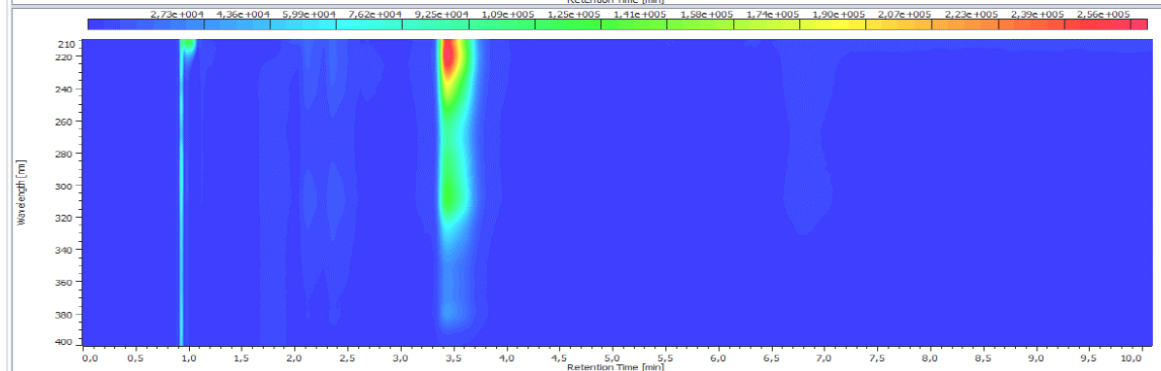

E2

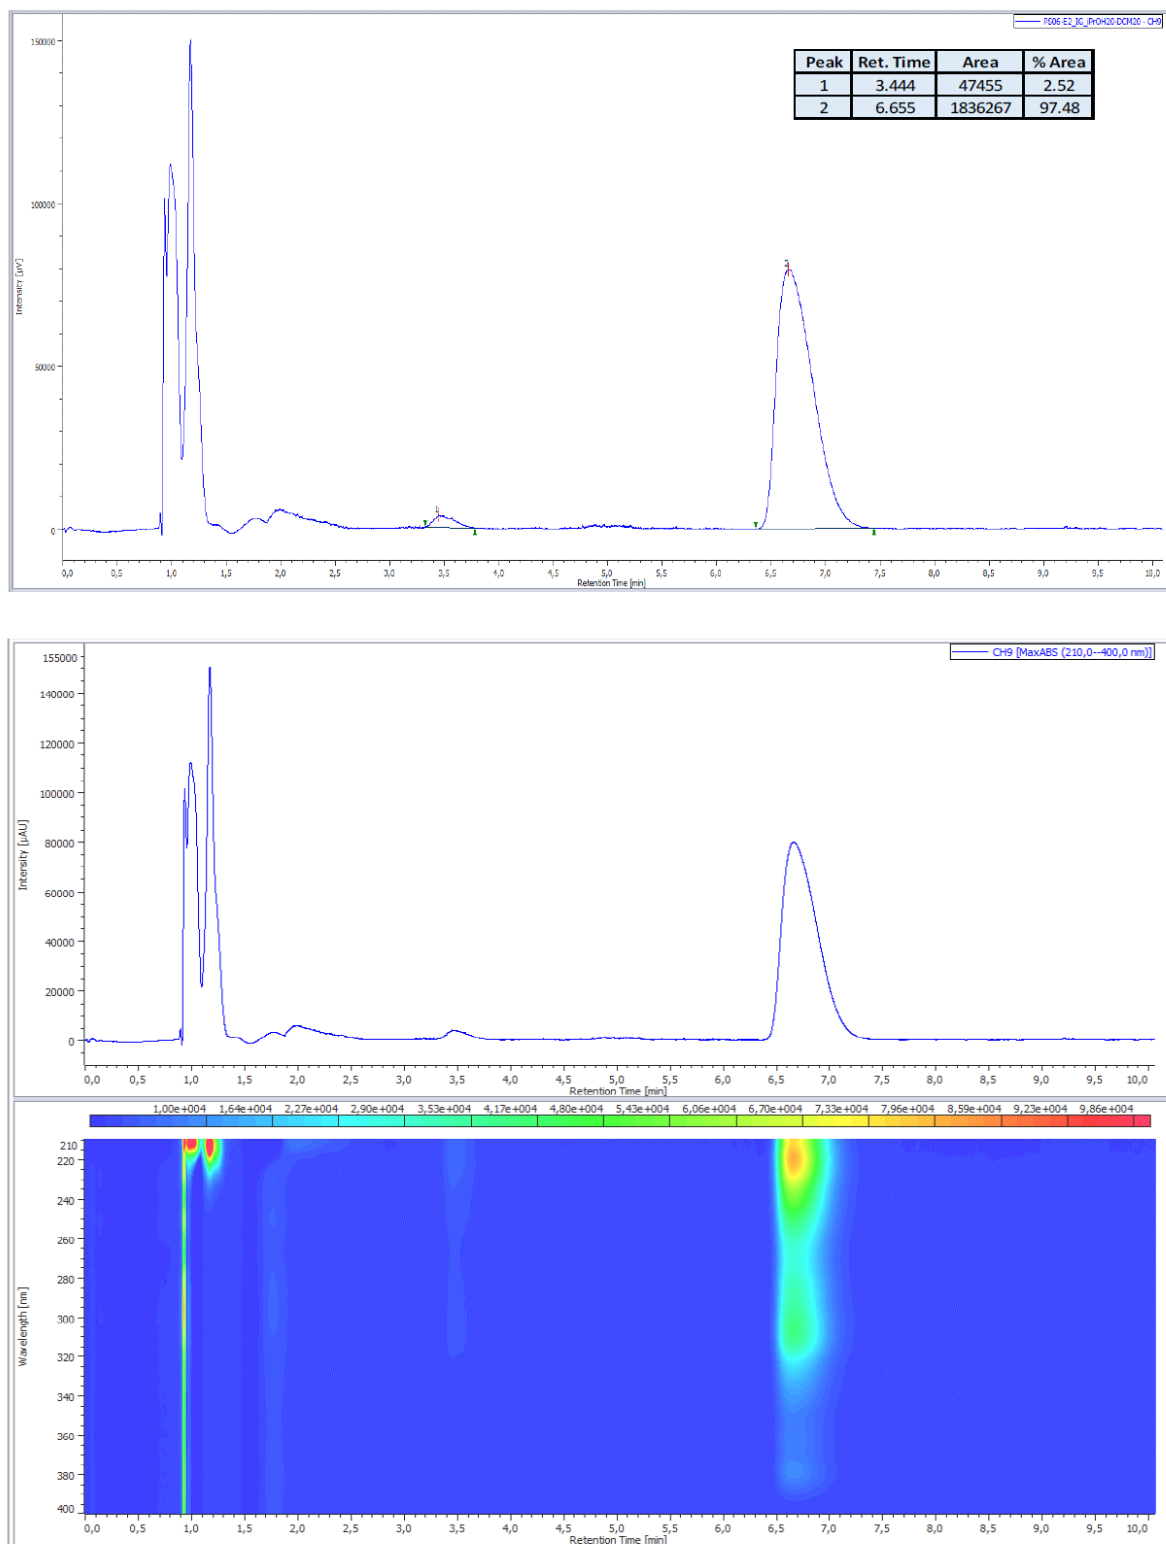

Figure S19. Chiral HPLC of Ax-o-CN.

| Conditions Analytiques : |                                |         |  |
|--------------------------|--------------------------------|---------|--|
| Colonne :                | CHIRALPAK IG 250 x 4,6 mm, 5µm |         |  |
| Débit :                  | 4 mL/min                       |         |  |
| Détection :              | 200-400 nM MaxAbs              |         |  |
| température pression BPR | 40°C - 120bars                 |         |  |
| Solvant :                | A : CO2                        |         |  |
|                          | B : i-PrOH                     |         |  |
| Gradient :               | Isocratique                    |         |  |
|                          | %A : 60                        | %B : 40 |  |

Date : 17/05/2021  
 Opérateur : LEBREQUIER Sabrina  
 Demandeur : PIETERS Grégory  
 Encadrant : PIETERS Grégory

| Conditions Prep :        |                               |         |  |
|--------------------------|-------------------------------|---------|--|
| Colonne :                | CHIRALPAK IG 250 x 21 mm, 5µm |         |  |
| Débit :                  | 80 mL/min                     |         |  |
| Détection :              | 200-400 nM MaxAbs             |         |  |
| température pression BPR | 40°C - 100 bars               |         |  |
| Solvant :                | A : CO2                       |         |  |
|                          | B : i-PrOH                    |         |  |
| Gradient :               | Isocratique                   |         |  |
|                          | %A : 70                       | %B : 30 |  |

**Profil de purification :**

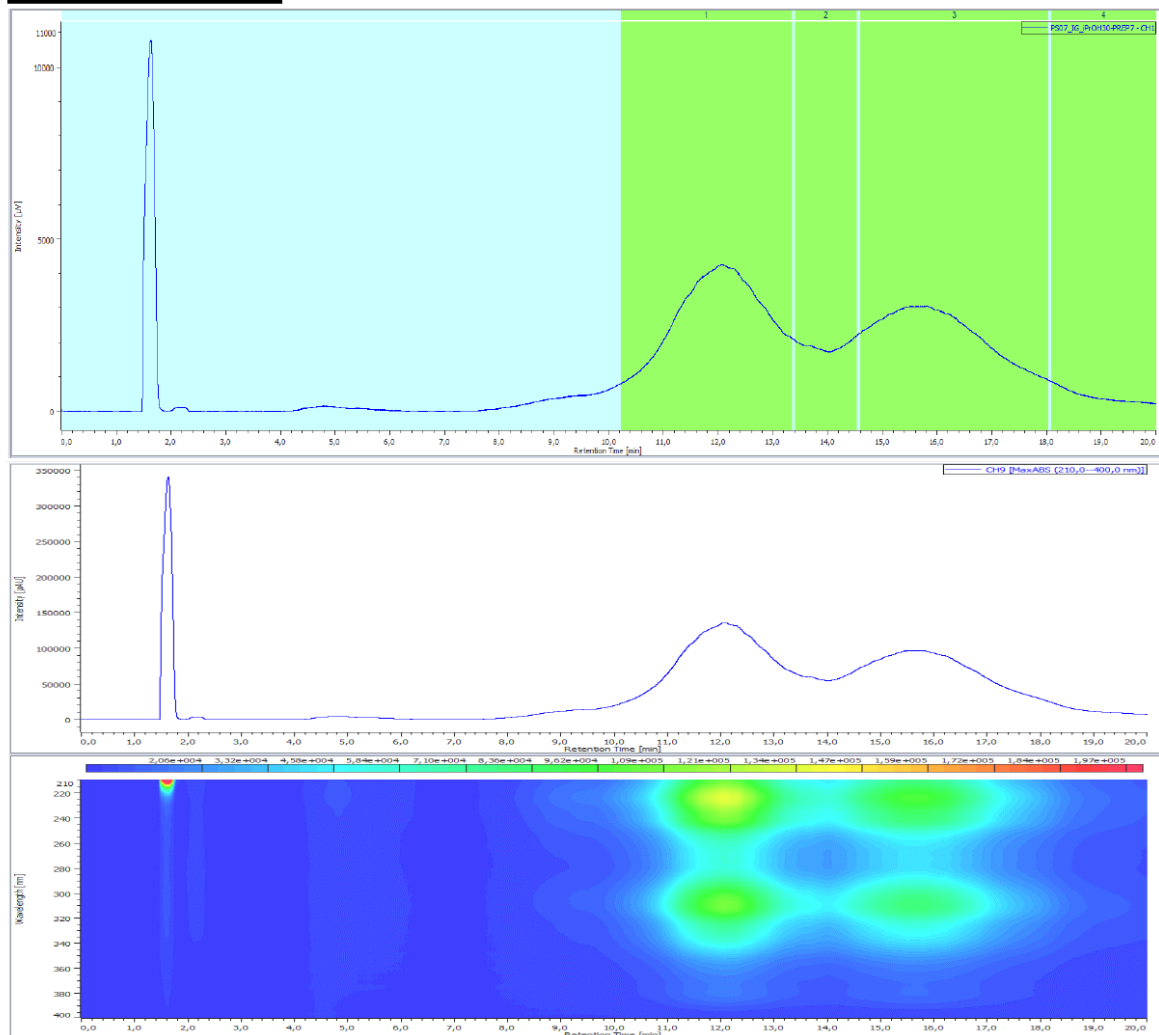

Conditions analytiques : Racémique avant purification :

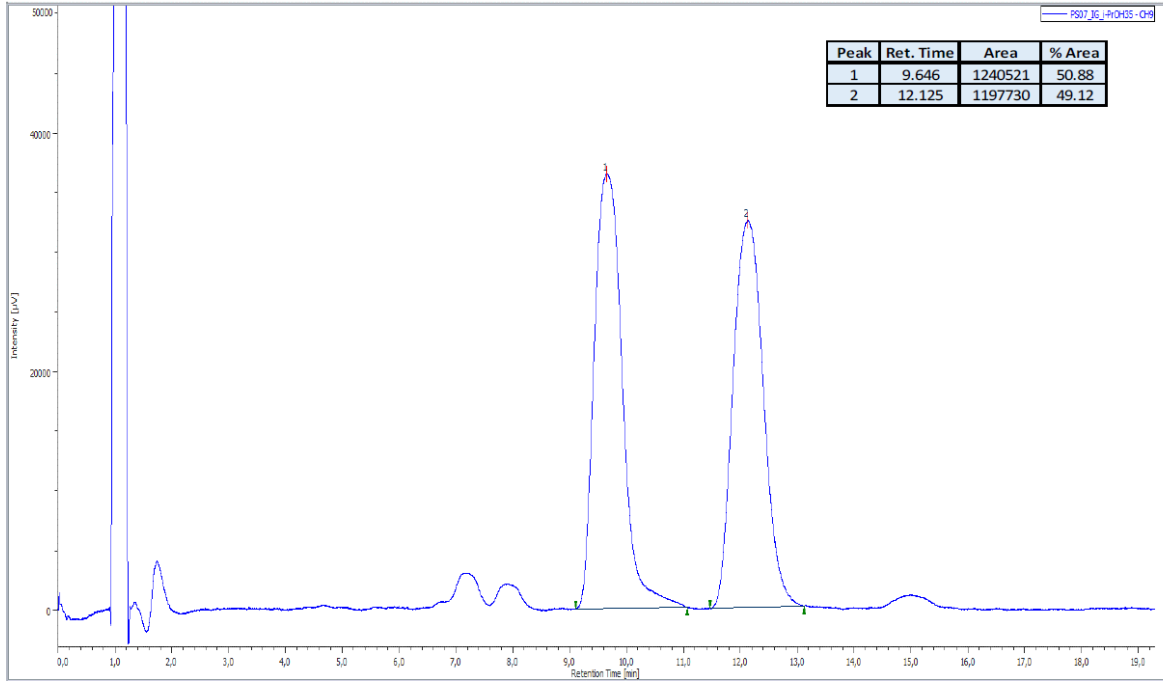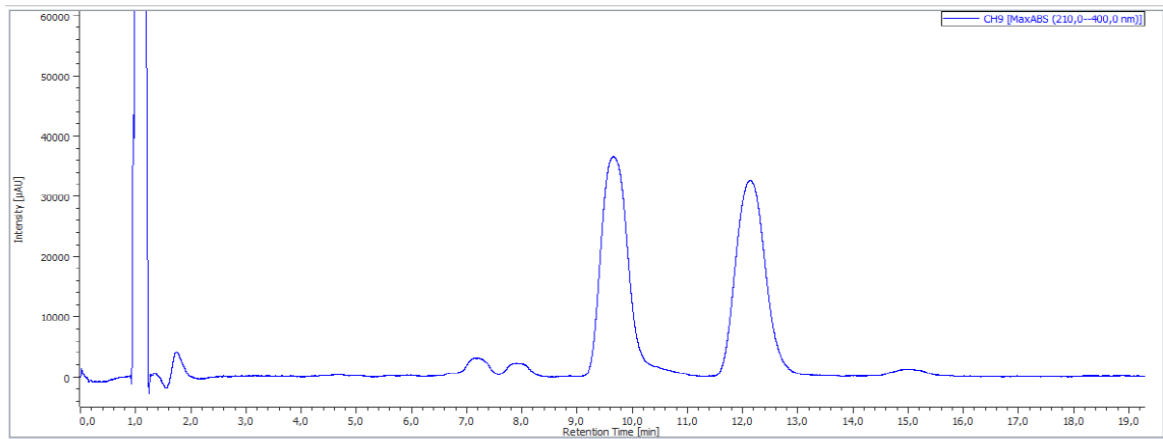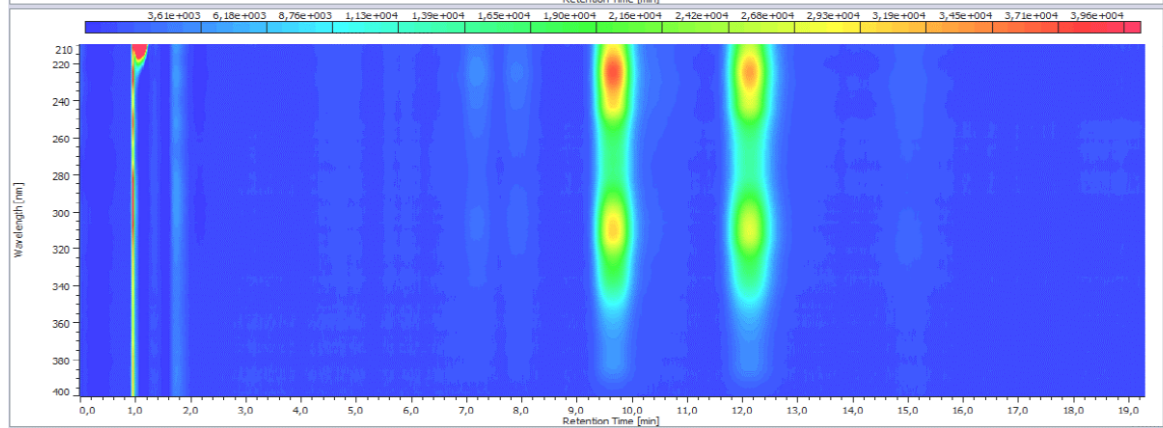



# Vérification des énantiomères

E1

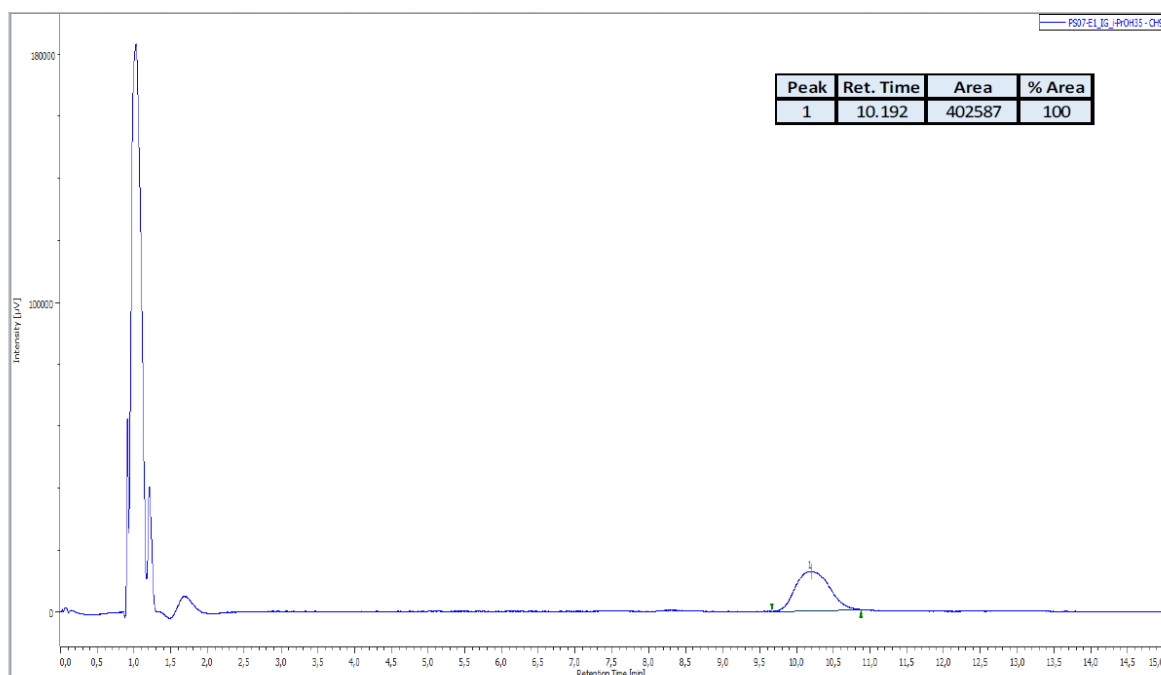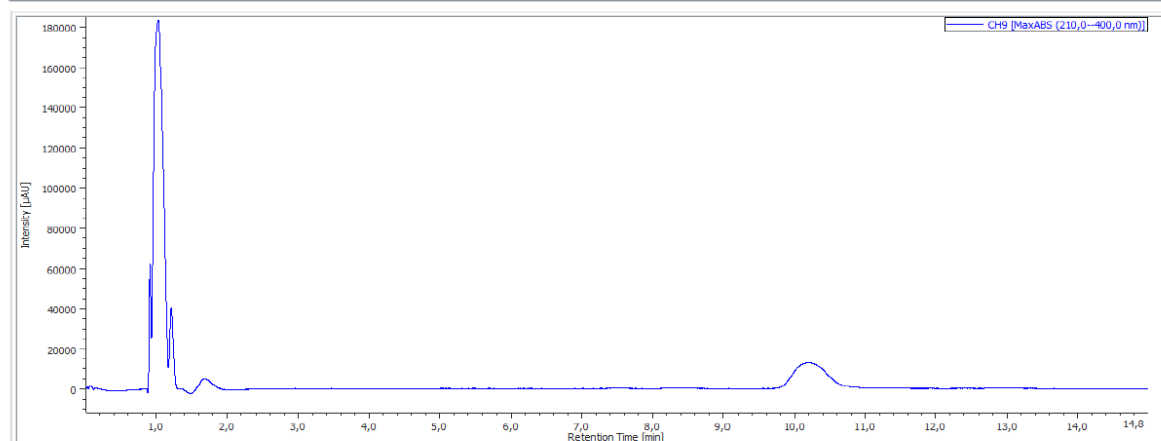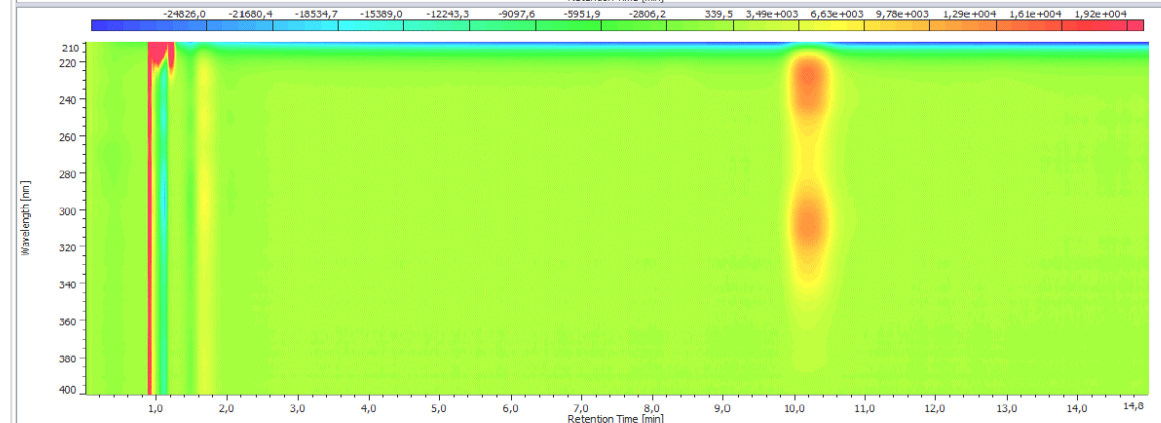

E2

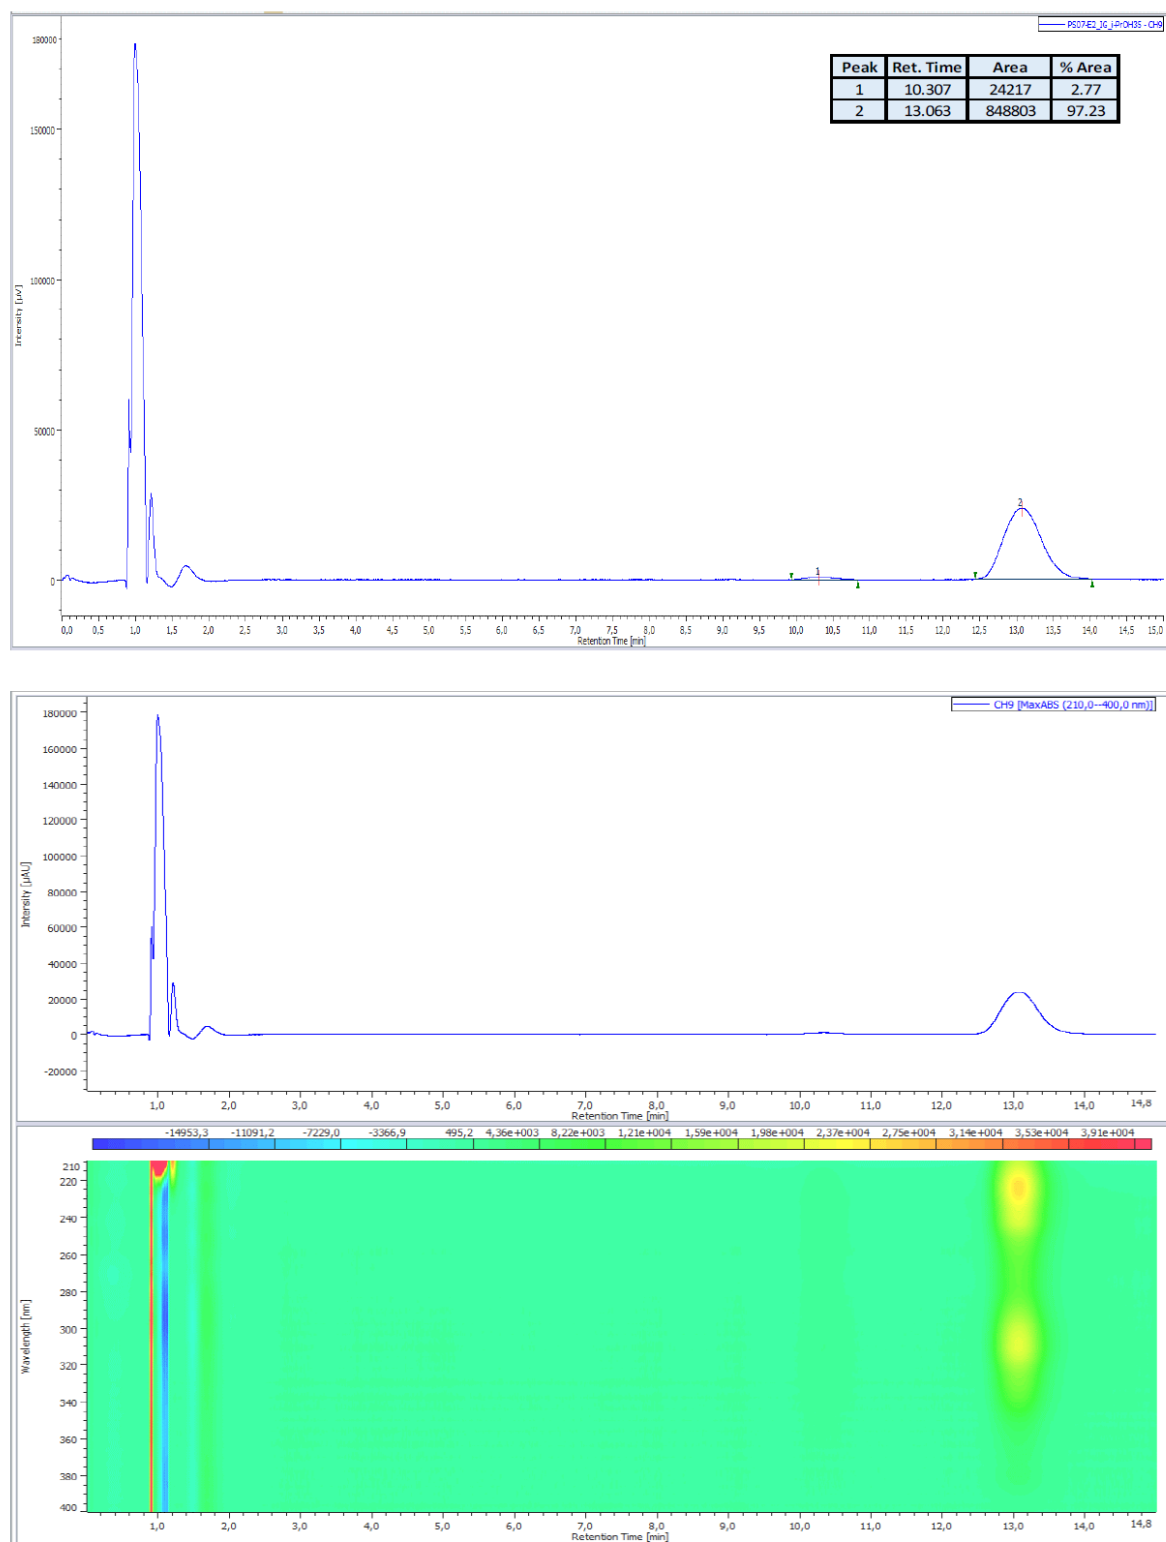

Figure S20. Chiral HPLC of Hel-*p*-CN.

## F. NMR spectra

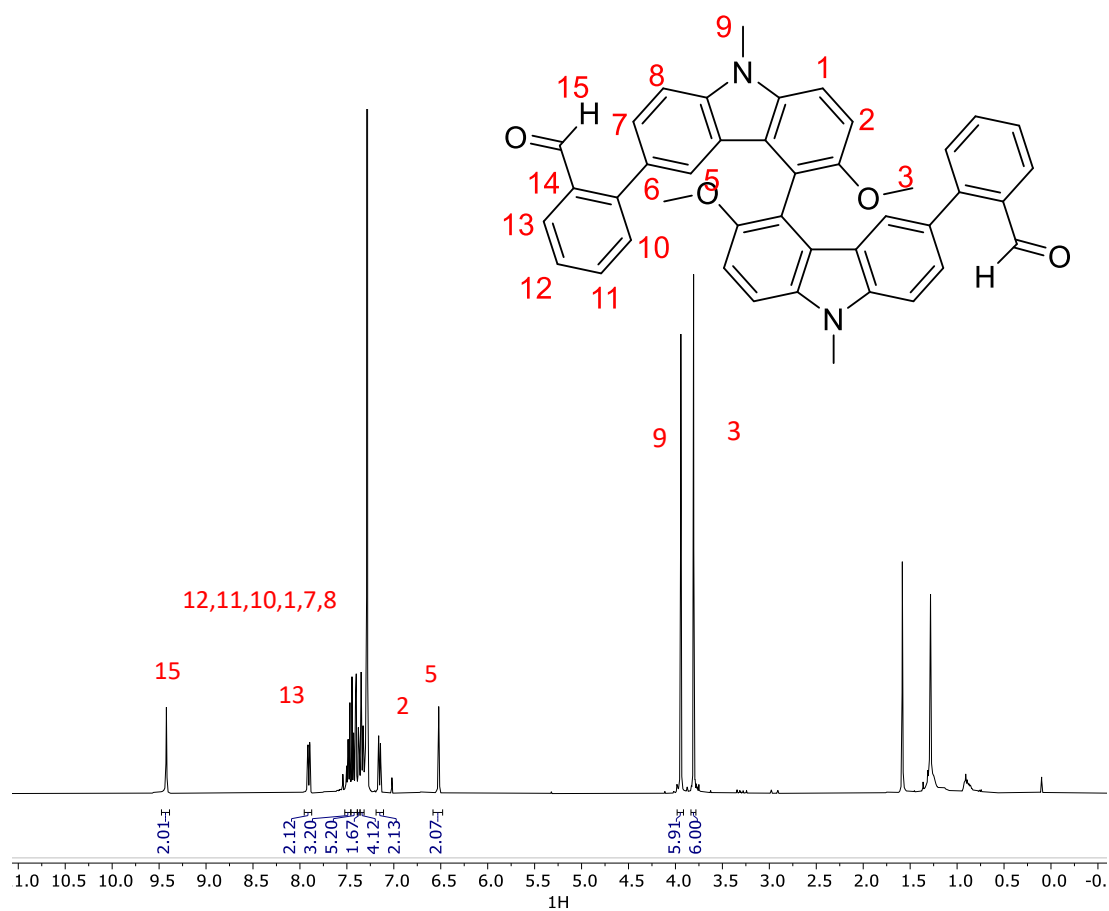

**Figure S21.** <sup>1</sup>H NMR spectrum of **Ax-*o*-CHO** in CDCl<sub>3</sub> at 298 K (400 MHz).

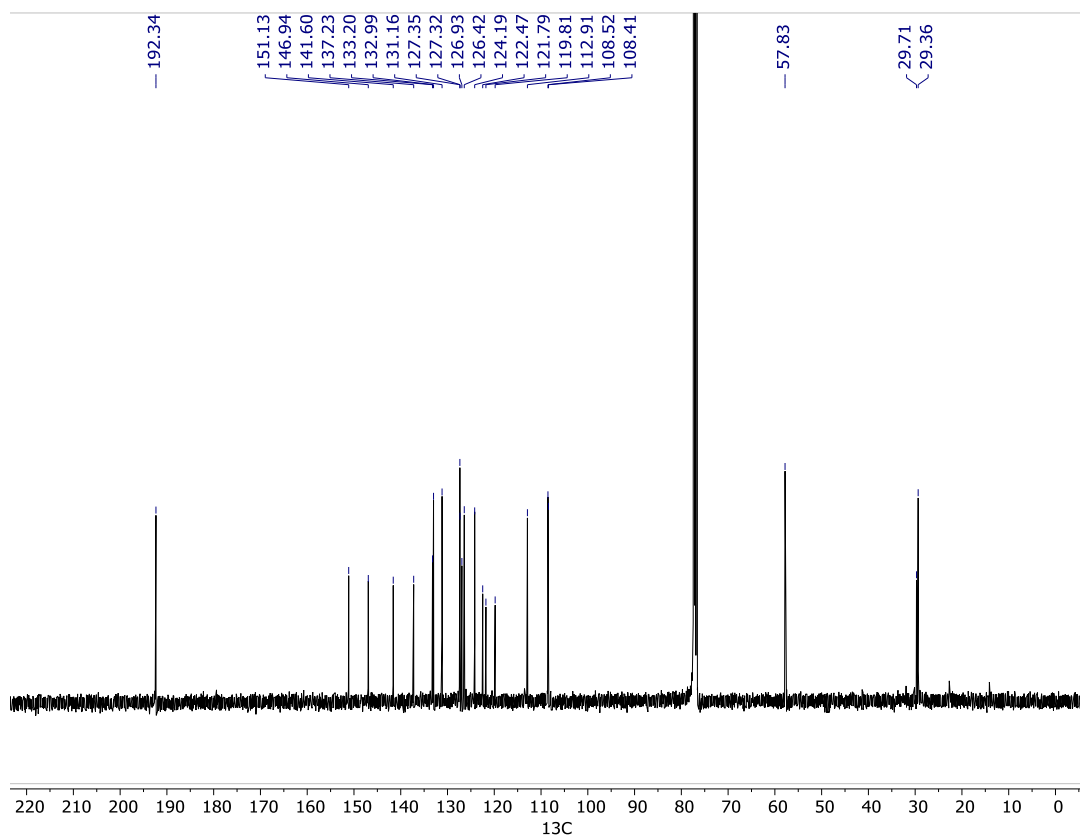

**Figure S22.**  $^{13}\text{C}$  NMR spectrum of **Ax-*o*-CHO** in  $\text{CDCl}_3$  at 298 K (101 MHz).

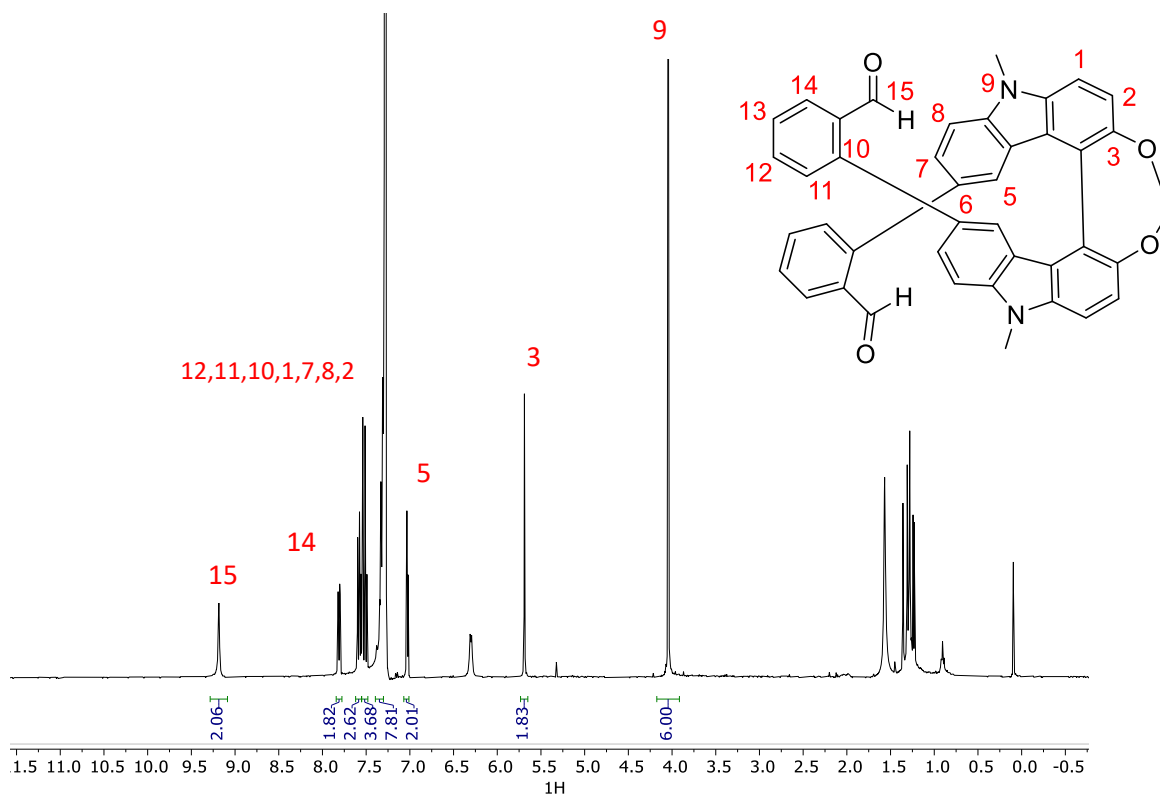

**Figure S23.**  $^1\text{H}$  NMR spectrum of **Hel-*o*-CHO** in  $\text{CDCl}_3$  at 298 K (400 MHz).

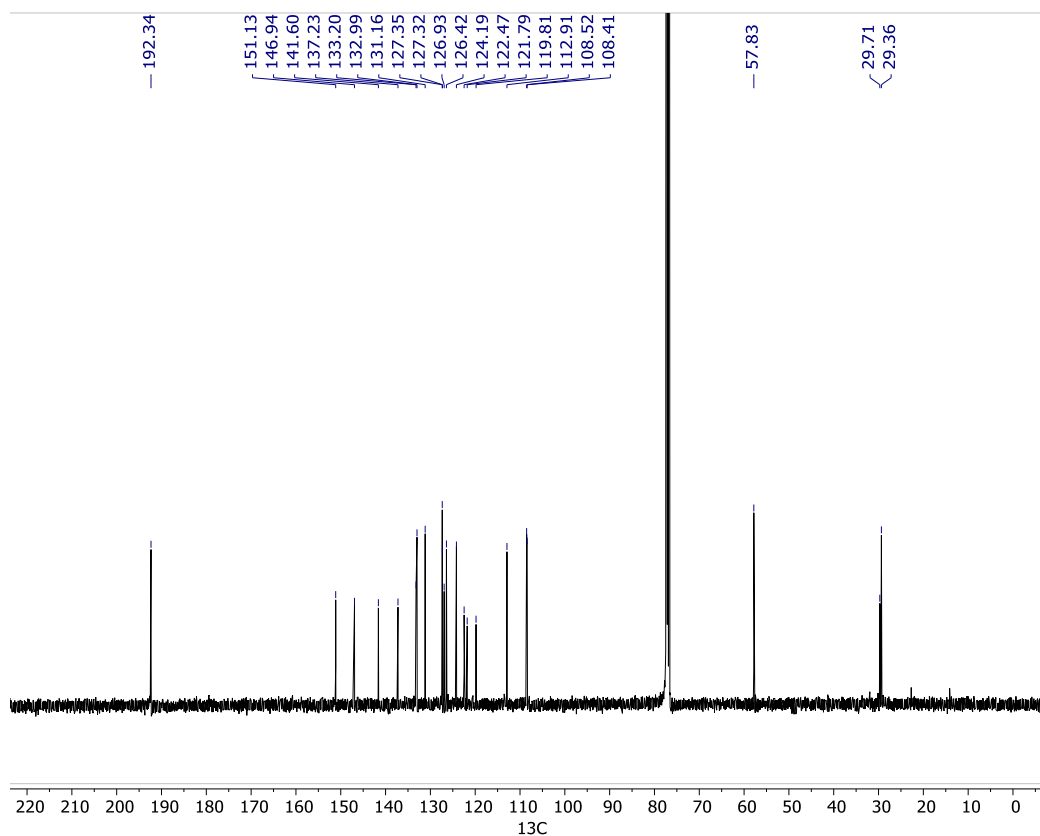

**Figure S24.**  $^{13}\text{C}$  NMR spectrum of **Hel-*o*-CHO** in  $\text{CDCl}_3$  at 298 K (101 MHz).

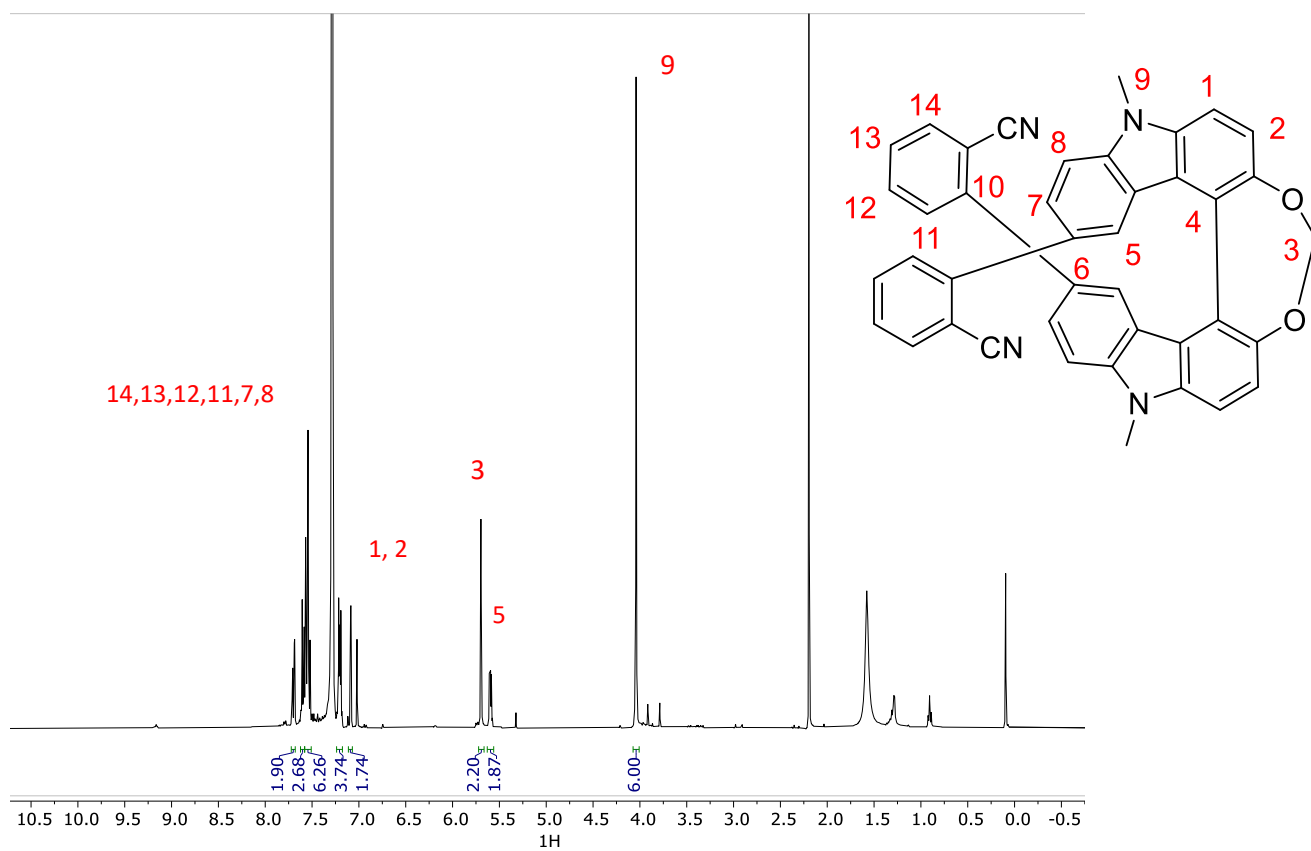

**Figure S25.**  $^1\text{H}$  NMR spectrum of **Hel-*o*-CN** in  $\text{CDCl}_3$  at 298 K (400 MHz).

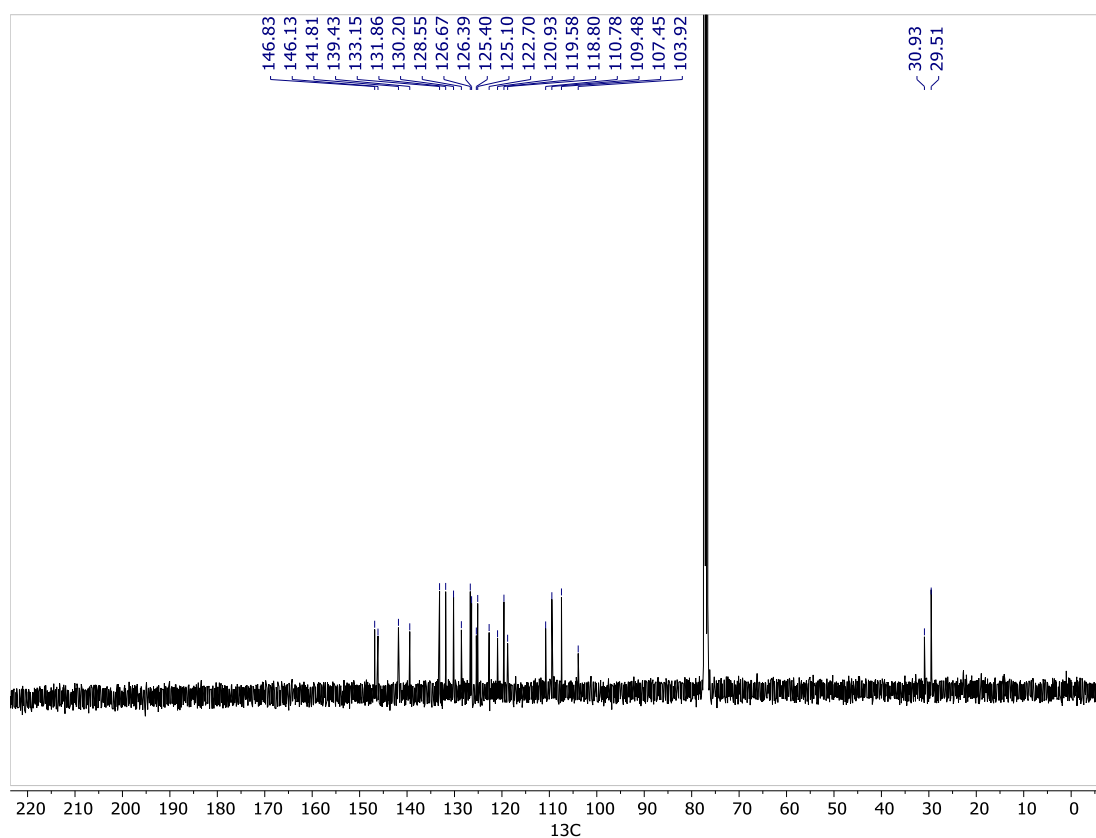

**Figure S26.**  $^{13}\text{C}$  NMR spectrum of **Hel-*o*-CN** in  $\text{CDCl}_3$  at 298 K (101 MHz).

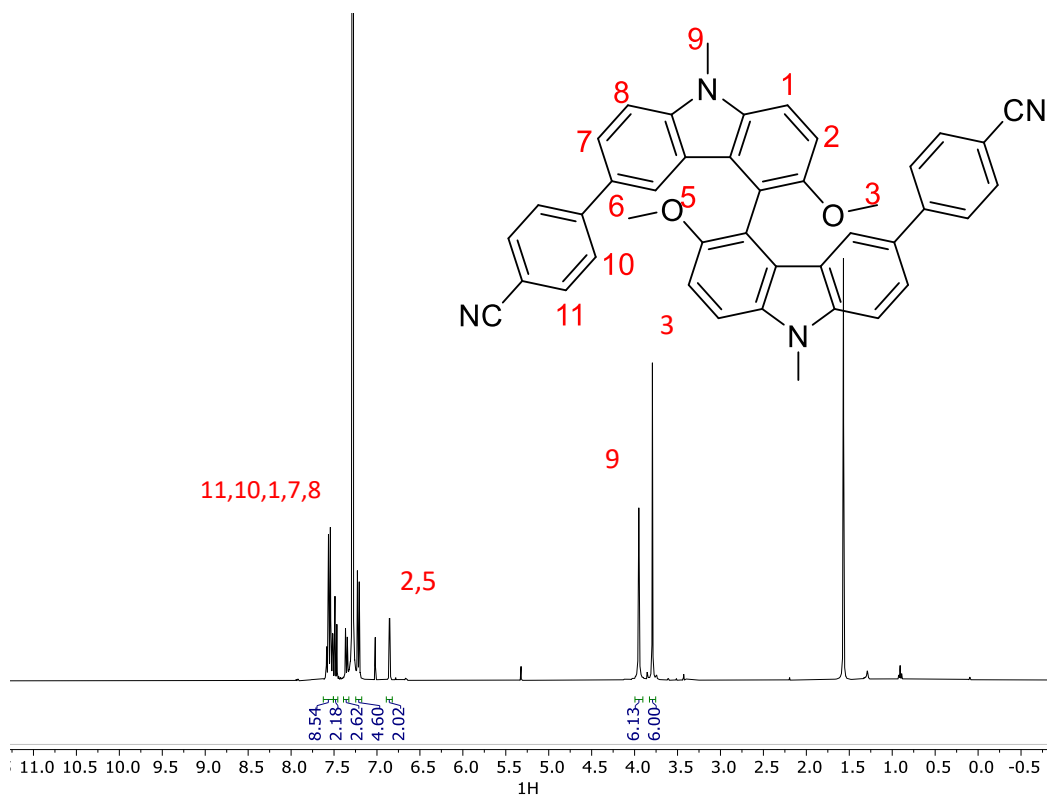

**Figure S27.**  $^1\text{H}$  NMR spectrum of **Ax-*p*-CN** in  $\text{CDCl}_3$  at 298 K (400 MHz).

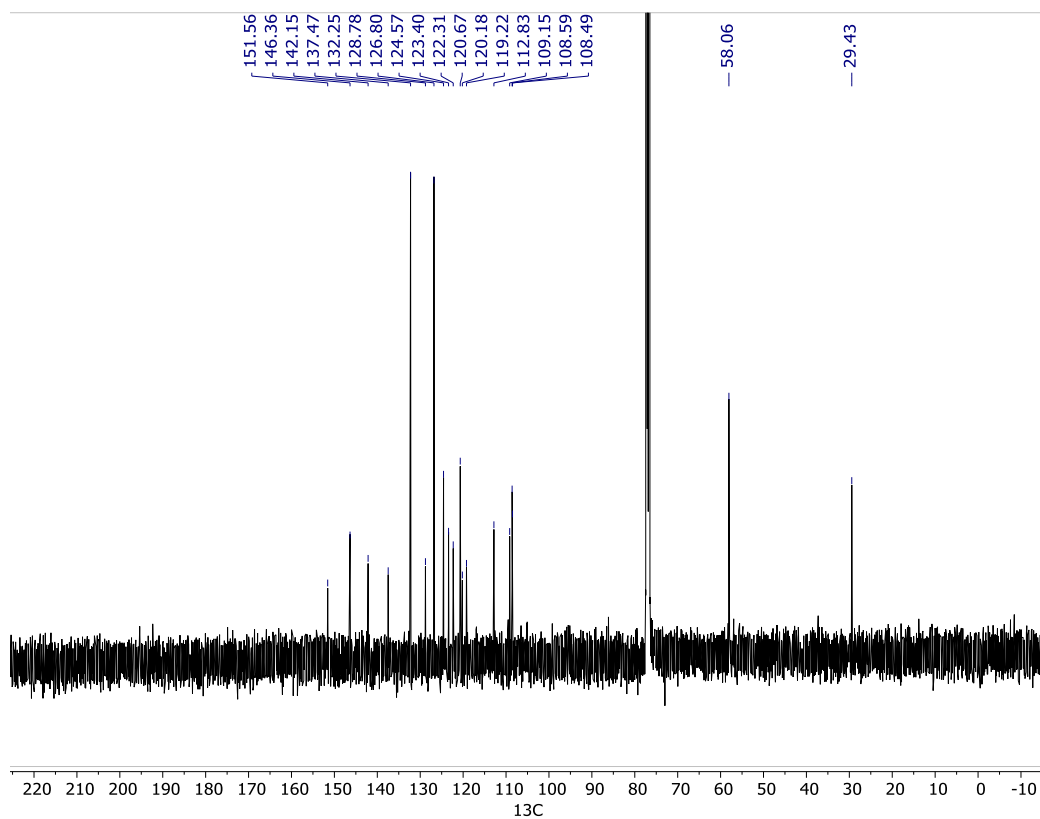

**Figure S28.**  $^{13}\text{C}$  NMR spectrum of **Ax-p-CN** in  $\text{CDCl}_3$  at 298 K (101 MHz).

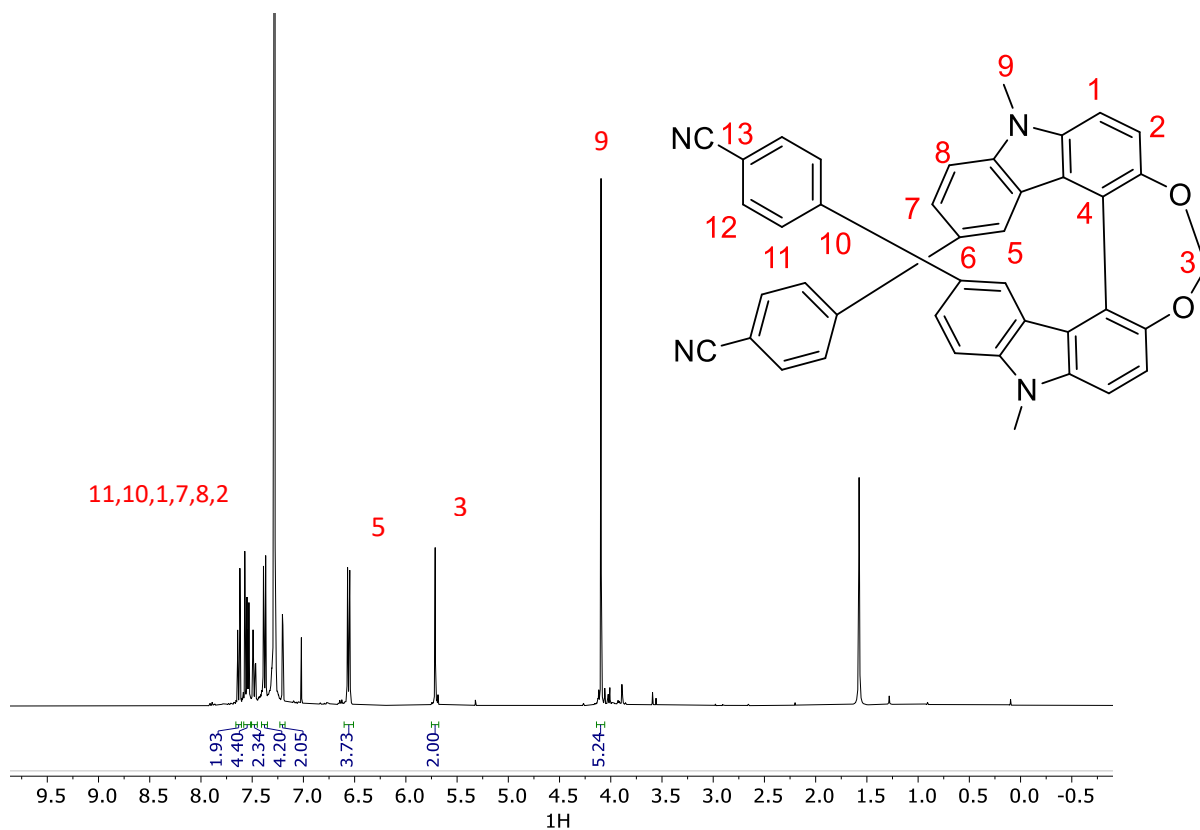

**Figure S29.**  $^1\text{H}$  NMR spectrum of **Hel-p-CN** in  $\text{CDCl}_3$  at 298 K (400 MHz).

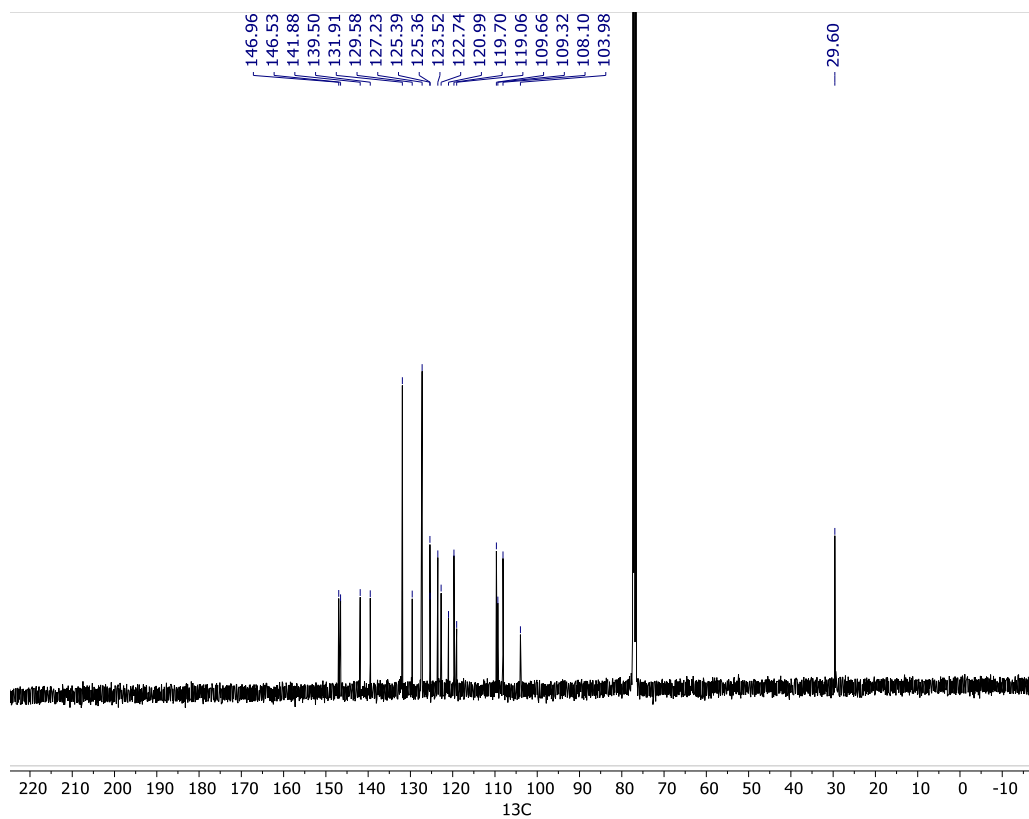

**Figure S30.**  $^{13}\text{C}$  NMR spectrum of **Hel-p-CN** in  $\text{CDCl}_3$  at 298 K (101 MHz).

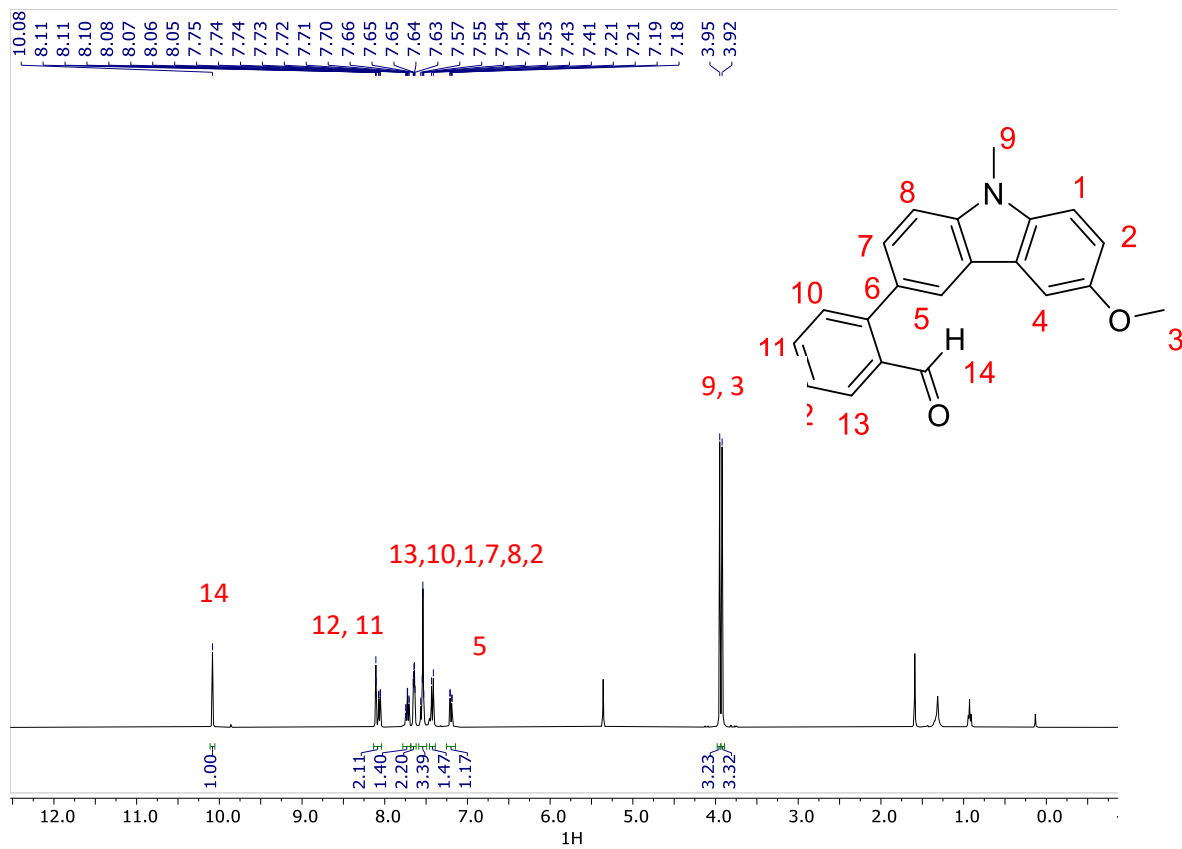

**Figure S31.**  $^1\text{H}$  NMR spectrum of **CBz-CHO** in  $\text{CD}_2\text{Cl}_2$  at 298 K (400 MHz).



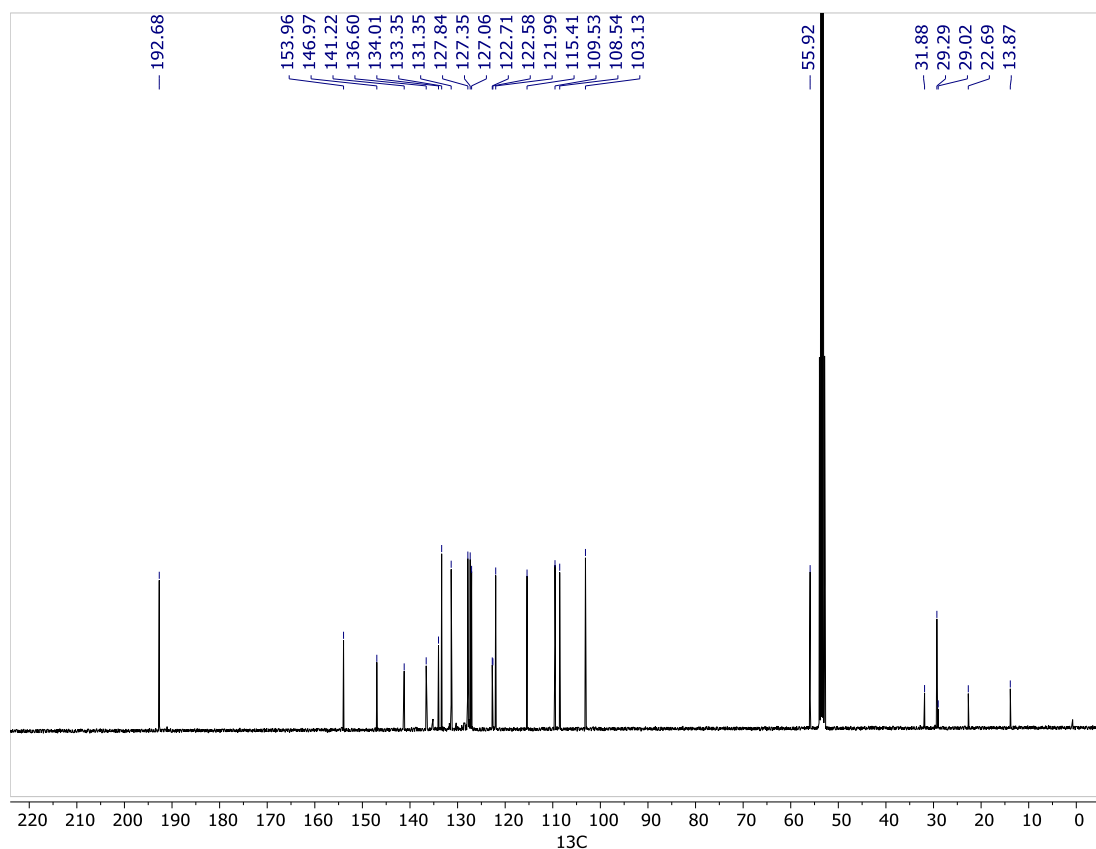

**Figure S32.** <sup>1</sup>H NMR spectrum of **CBz-CHO** in CD<sub>2</sub>Cl<sub>2</sub> at 298 K (101 MHz).

## G. Theoretical calculations

All computations were performed by using Kohn-Sham Density functional theory (DFT) as implemented in the Gaussian (G16) package,<sup>2</sup> along the PBE0 functional<sup>3</sup> and the def2-SV(P) basis.<sup>4</sup> Solvent effects were included by means of the polarizable continuum model (PCM)<sup>5</sup> for toluene and dimethylformamide (DMF) to match the experimental conditions. Dispersion corrections from Grimme 'D3' were considered in the calculations.<sup>6</sup>

The 200 lowest-energy vertical spin-allowed electronic excitations were calculated for the absorption and electronic circular dichroism (ECD) spectra. In order to simulate the spectral envelopes, the transitions were subsequently Gaussian-broadened with  $\sigma = 0.20$  eV. For overviews of the theoretical approach to model natural optical activity by quantum chemical calculations, esp. via TD-DFT, see, for example, References [7,8].<sup>7</sup>

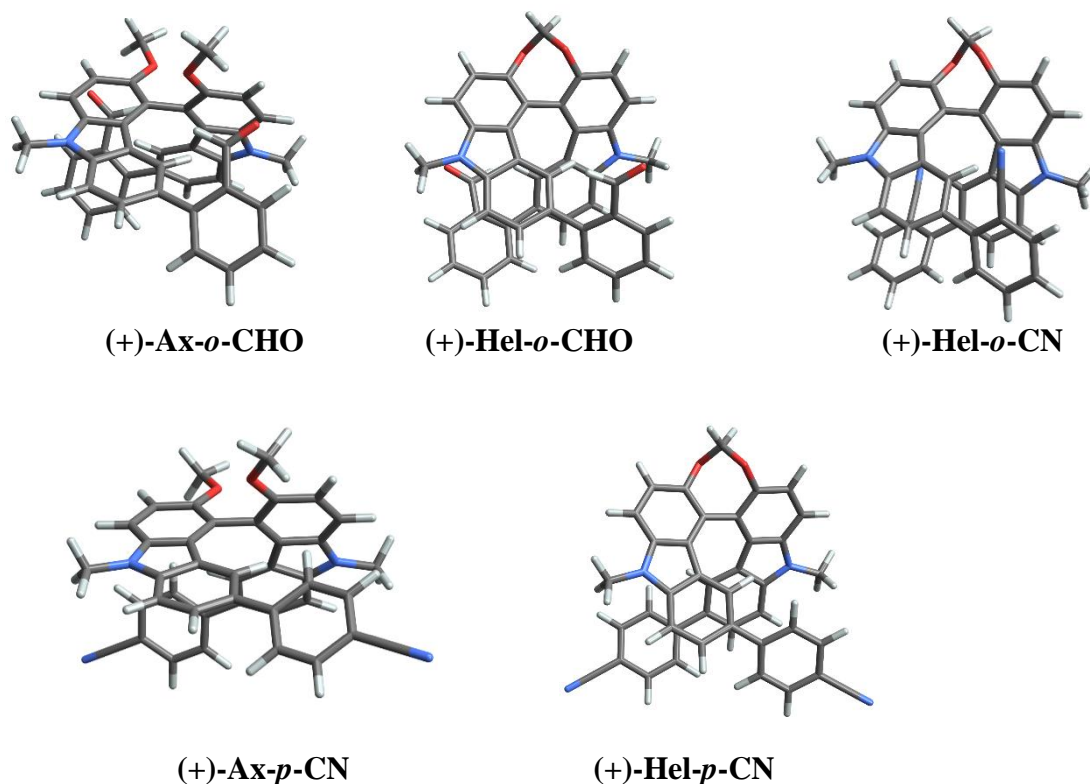

**Figure S33.** Optimized molecular structures of (+)-Hel-o-CHO, (+)-Hel-o-CN, (+)-Ax-o-CHO, (+)-Ax-p-CN and (+)-Hel-p-CN.

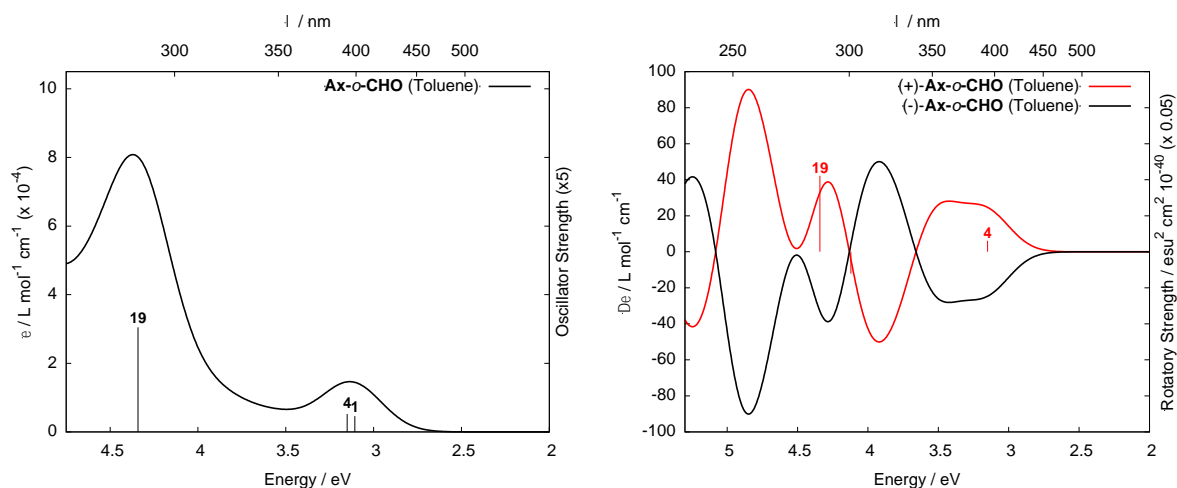

**Figure S34.** (Left) Calculated absorption and (right) ECD spectra of ( $\pm$ )-**Ax-o-CHO**. Selected transitions and oscillator and rotatory strengths are indicated as ‘stick spectra’. Predominant transitions for (+)-**Ax-o-CHO** are numbered according to Table S3.

**Table S3.** Selected excitations and occupied (occ)-unoccupied (unocc) MO pair contributions (greater than 10%) for (+)-**Ax-o-CHO** with toluene. H and L indicate the HOMO and LUMO, respectively.

| Excitation | E [eV] | $\lambda$ [nm] | f     | R [ $10^{-40}$ cgs] | occ. no. | unocc no. | %  |
|------------|--------|----------------|-------|---------------------|----------|-----------|----|
| #1         | 3.107  | 399            | 0.092 | 30.04               | 165(H)   | 166(L)    | 45 |
| #4         | 3.150  | 394            | 0.105 | 122.46              | 164      | 167       | 47 |
| #15        | 4.121  | 301            | 0.045 | -242.43             | 165      | 170       | 34 |
| #16        | 4.134  | 300            | 0.169 | 138.83              | 165      | 171       | 24 |
|            |        |                |       |                     | 164      | 170       | 17 |
| #19        | 4.341  | 286            | 0.610 | 843.43              | 163      | 168       | 23 |
| #20        | 4.361  | 284            | 0.140 | -161.49             | 161      | 166       | 10 |
|            |        |                |       |                     | 163      | 168       | 10 |
| #21        | 4.362  | 284            | 0.111 | -273.45             | 161      | 167       | 11 |
| #22        | 4.384  | 283            | 0.115 | -286.56             | 162      | 168       | 22 |
|            |        |                |       |                     | 161      | 167       | 12 |
| #25        | 4.591  | 270            | 0.059 | -287.31             | 163      | 169       | 42 |
| #26        | 4.628  | 268            | 0.366 | 337.27              | 162      | 169       | 41 |

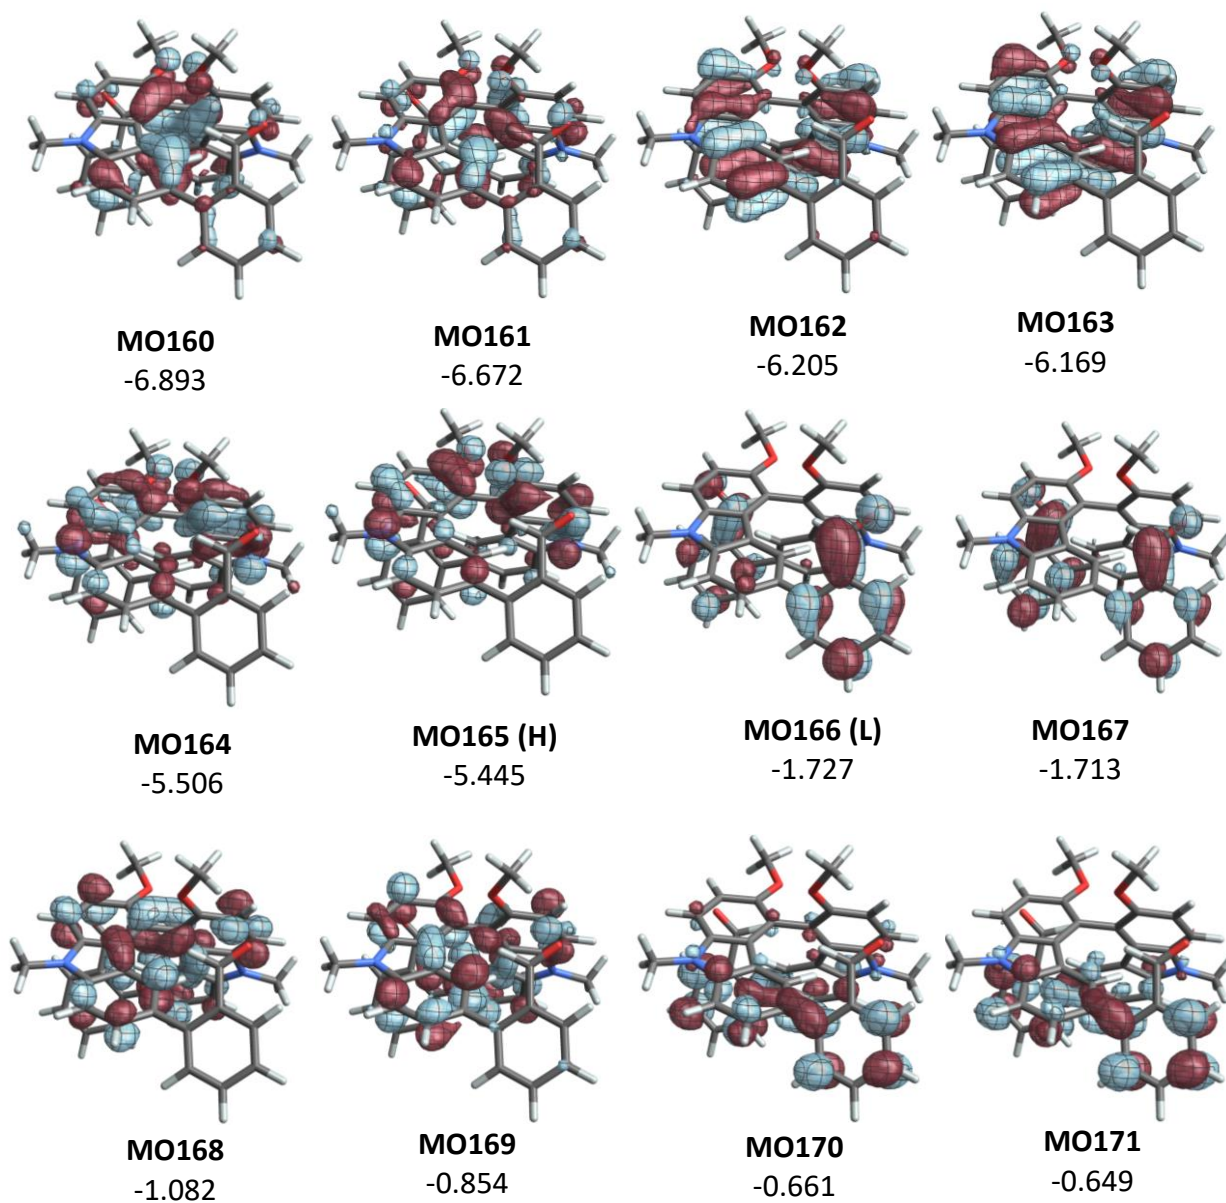

**Figure S35.** Isosurfaces ( $\pm 0.035$  au) of Molecular Orbitals (MOs) for (+)-*Ax-o*-CHO (toluene). Values listed in parentheses are the corresponding orbitals energies in eV.

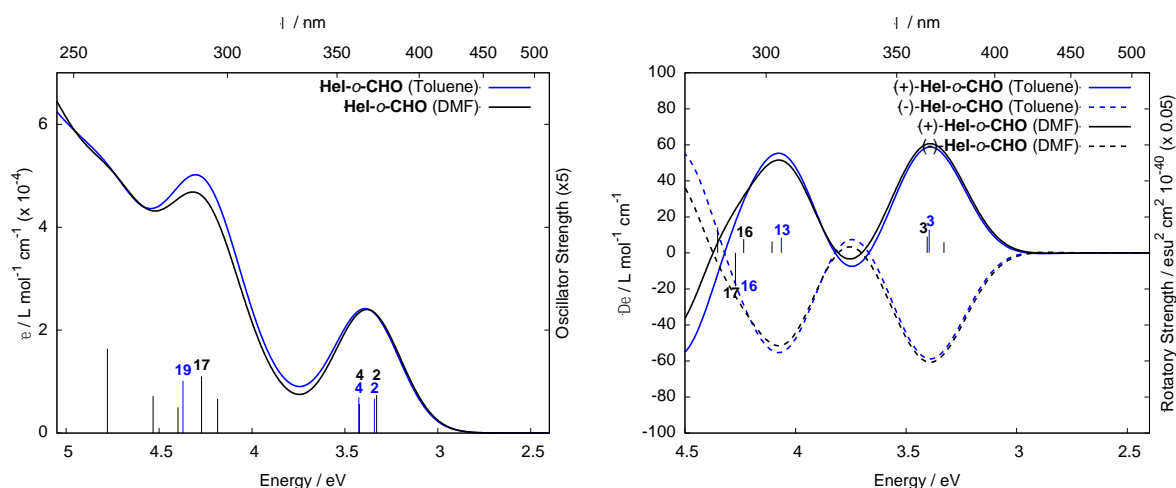

**Figure S36.** Calculated UV/Vis (left) and ECD (right) spectra of ( $\pm$ )-**Hel-o-CHO**. Selected transitions and oscillator and rotatory strengths are indicated as ‘stick spectra’. Predominant transitions for (+)-**Hel-o-CHO** are numbered according to Table S4.

**Table S4.** Selected excitations and occupied (occ)-unoccupied (unocc) MO pair contributions (greater than 10%) for (+)-**Hel-o-CHO** with toluene. H and L indicate the HOMO and LUMO, respectively.

| Excitation | E [eV] | $\lambda$ [nm] | f     | R [ $10^{-40}$ cgs] | occ. no. | unocc no. | %  |
|------------|--------|----------------|-------|---------------------|----------|-----------|----|
| #2         | 3.341  | 371            | 0.132 | 2.69                | 160(H)   | 162       | 40 |
| #3         | 3.396  | 365            | 0.073 | 255.78              | 159      | 161(L)    | 38 |
| #4         | 3.425  | 362            | 0.139 | -57.71              | 160      | 163       | 35 |
| #13        | 4.065  | 305            | 0.058 | 171.98              | 158      | 163       | 26 |
| #16        | 4.205  | 295            | 0.159 | -264.00             | 160      | 164       | 22 |
|            |        |                |       |                     | 160      | 165       | 16 |
| #17        | 4.261  | 291            | 0.143 | 175.17              | 159      | 164       | 20 |
| #18        | 4.316  | 287            | 0.101 | 102.58              | 159      | 165       | 36 |
| #19        | 4.371  | 284            | 0.203 | -60.92              | 160      | 166       | 40 |
| #26        | 4.759  | 261            | 0.222 | 169.06              | 158      | 164       | 32 |
| #27        | 4.780  | 259            | 0.138 | -4.95               | 157      | 164       | 22 |

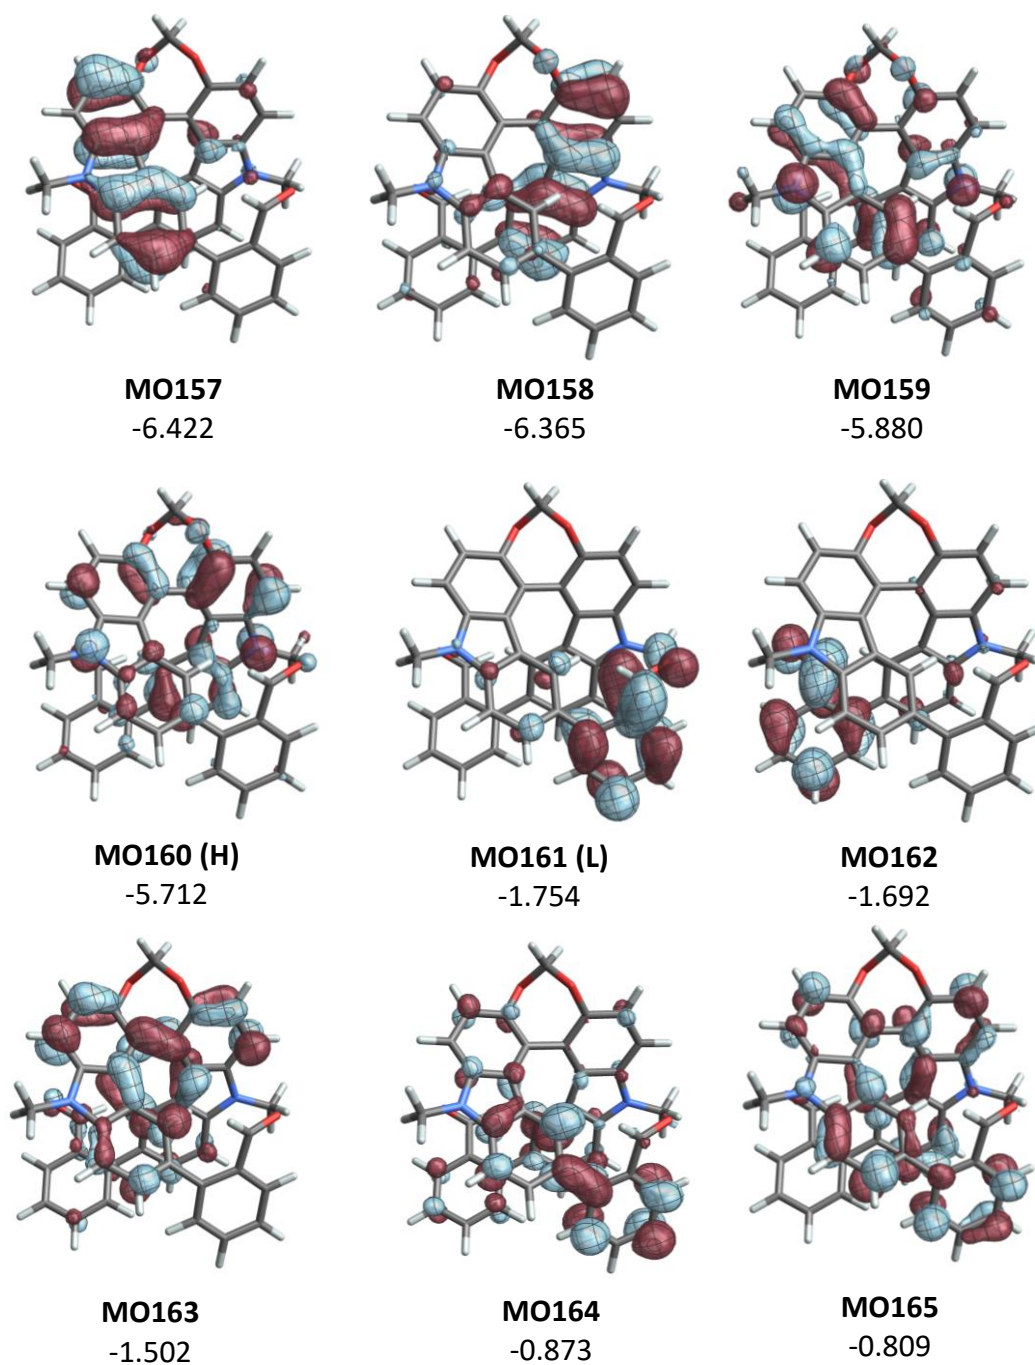

**Figure S37.** Isosurfaces ( $\pm 0.035$  au) of Molecular Orbitals (MOs) for (+)-**Hel-*o*-CHO (toluene)**. Values listed in parentheses are the corresponding orbitals energies in eV.

**Table S5.** Selected excitations and occupied (occ)-unoccupied (unocc) MO pair contributions (greater than 10%) for (+)-**Hel-o-CHO** with DFM. H and L indicate the HOMO and LUMO, respectively.

| Excitation | E [eV] | $\lambda$ [nm] | f     | R [ $10^{-40}$ cgs] | occ. no. | unocc no. | %  |
|------------|--------|----------------|-------|---------------------|----------|-----------|----|
| #2         | 3.329  | 372            | 0.148 | 119.22              | 160      | 162       | 26 |
|            |        |                |       |                     | 160(H)   | 161(L)    | 17 |
| #3         | 3.405  | 364            | 0.045 | 180.67              | 160      | 163       | 29 |
| #4         | 3.423  | 262            | 0.114 | -34.31              | 159      | 162       | 40 |
| #15        | 4.185  | 296            | 0.133 | -60.07              | 160      | 164       | 13 |
| #16        | 4.235  | 293            | 0.067 | 153.45              | 159      | 164       | 31 |
| #17        | 4.271  | 290            | 0.221 | -370.98             | 160      | 165       | 36 |
| #18        | 4.352  | 285            | 0.100 | 282.69              | 159      | 165       | 40 |
| #19        | 4.400  | 282            | 0.100 | 52.79               | 160      | 166       | 40 |
| #22        | 4.532  | 274            | 0.144 | -251.38             | 159      | 166       | 38 |
| #27        | 4.778  | 259            | 0.328 | 360.77              | 158      | 164       | 42 |



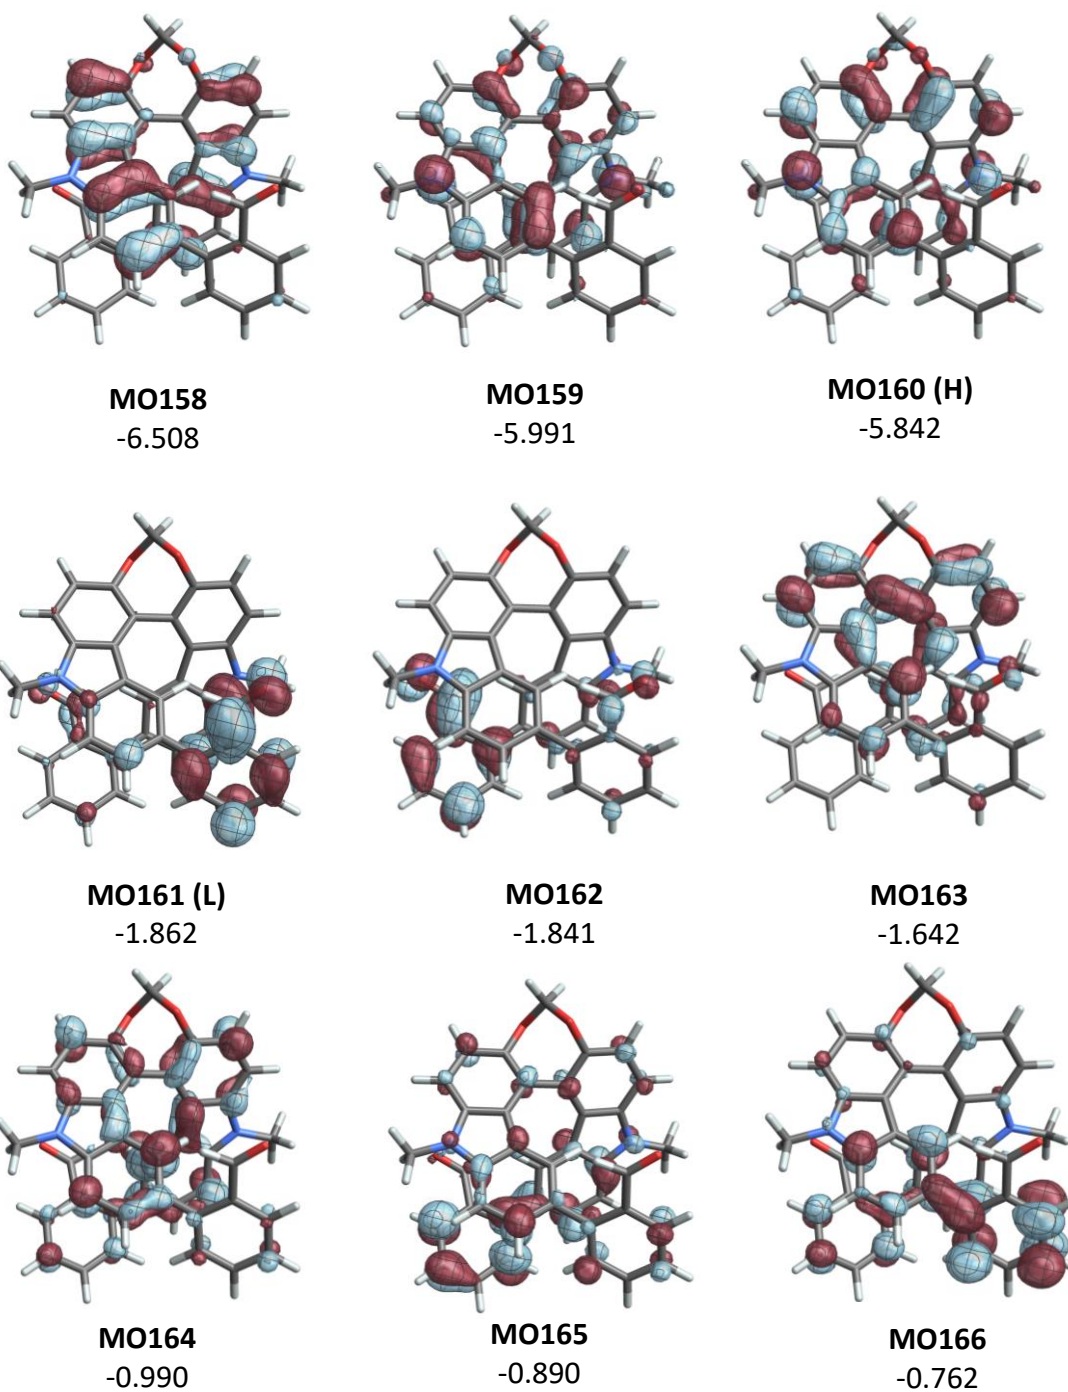

**Figure S38.** Isosurfaces ( $\pm 0.035$  au) of Molecular Orbitals (MOs) for (+)-**Hel-*o*-CHO (DMF)**. Values listed in parentheses are the corresponding orbitals energies in eV.



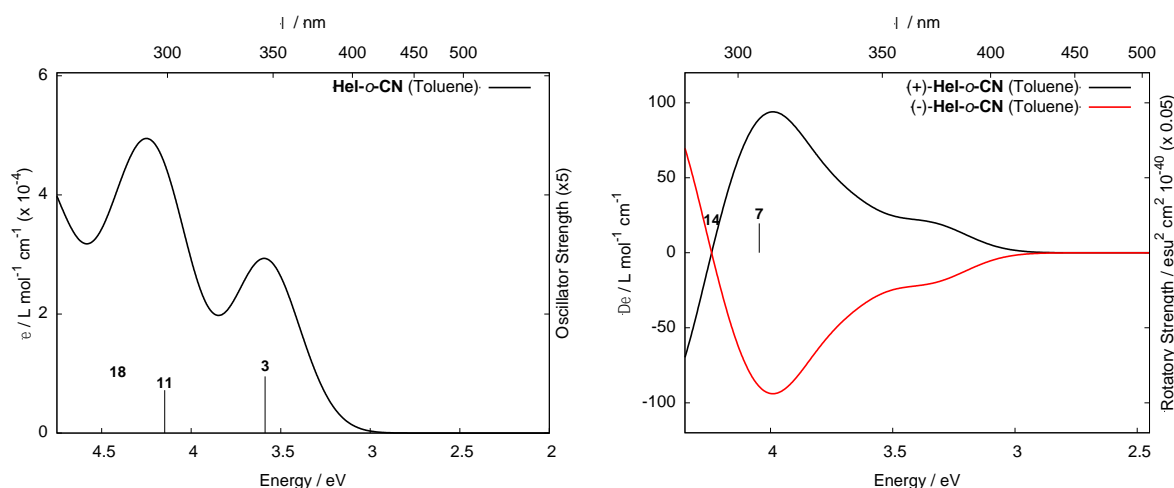

**Figure S39.** Calculated UV/Vis (left) and ECD (right) spectra of ( $\pm$ )-**Hel-o-CN**. Selected transitions and oscillator and rotatory strengths are indicated as ‘stick spectra’. Predominant transitions for (+)-**Hel-o-CN** are numbered according to Table S6.

**Table S6.** Selected excitations and occupied (occ)-unoccupied (unocc) MO pair contributions (greater than 10%) for (+)-**Hel-o-CN** with toluene. H and L indicate the HOMO and LUMO, respectively.

| Excitation | E [eV] | $\lambda$ [nm] | f     | R [ $10^{-40}$ cgs] | occ. no. | unocc no. | %  |
|------------|--------|----------------|-------|---------------------|----------|-----------|----|
| #1         | 3.414  | 363            | 0.077 | 108.34              | 158(H)   | 160       | 46 |
| #2         | 3.529  | 351            | 0.049 | -126.88             | 158      | 159(L)    | 47 |
| #3         | 3.587  | 346            | 0.191 | 63.20               | 158      | 161       | 48 |
| #5         | 3.663  | 338            | 0.109 | 193.05              | 157      | 159       | 48 |
| #7         | 4.046  | 306            | 0.080 | 391.05              | 155      | 160       | 34 |
| #10        | 4.144  | 299            | 0.089 | -151.96             | 156      | 159       | 22 |
| #11        | 4.148  | 299            | 0.144 | -262.99             | 158      | 162       | 18 |
| #14        | 4.236  | 293            | 0.109 | 308.73              | 157      | 162       | 20 |
|            |        |                |       |                     | 158      | 163       | 17 |
| #17        | 4.344  | 285            | 0.142 | -30.66              | 157      | 164       | 34 |
| #18        | 4.410  | 281            | 0.181 | -308.64             | 157      | 163       | 42 |

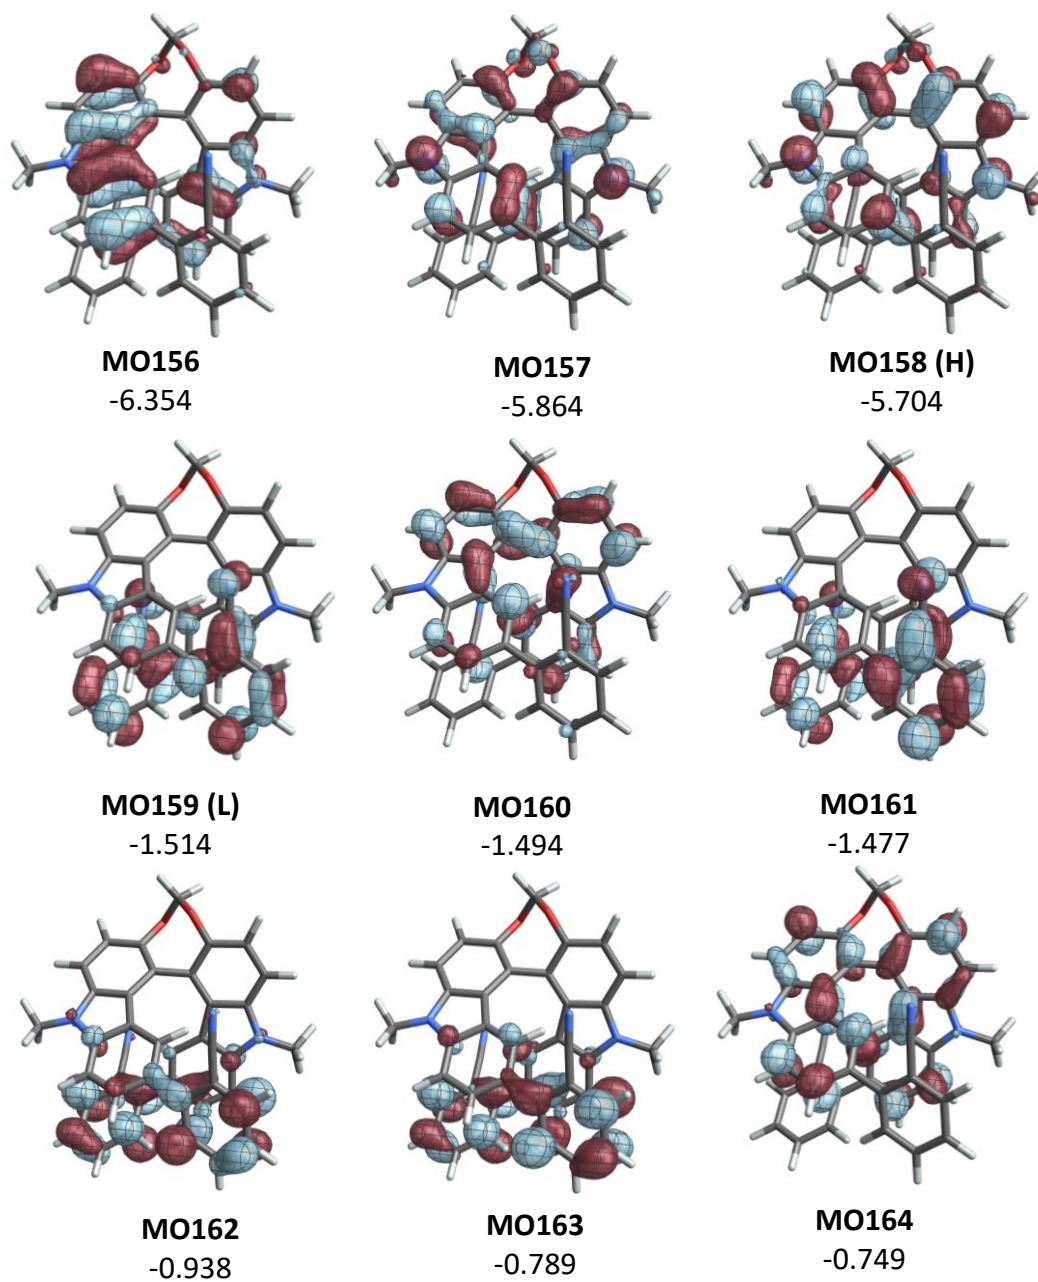

**Figure S40.** Isosurfaces ( $\pm 0.035$  au) of Molecular Orbitals (MOs) for (+)-*Hel-o*-CN (toluene). Values listed in parentheses are the corresponding orbitals energies in eV.

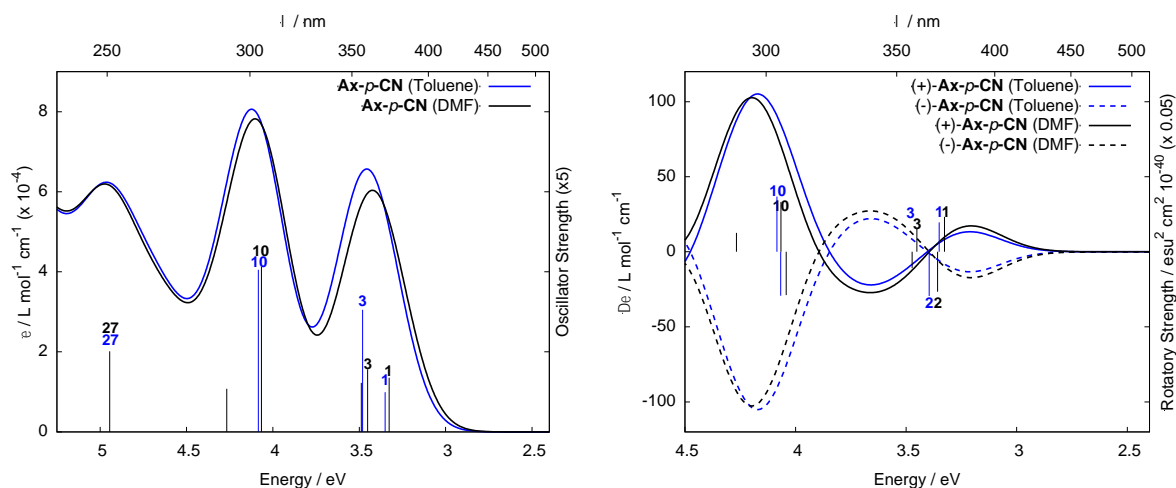

**Figure S41.** Calculated UV/Vis (left) and ECD (right) spectra of ( $\pm$ )-**Ax-p-CN**. Selected transitions and, oscillator and rotatory strengths are indicated as ‘stick spectra’. Predominant transitions for (+)-**Ax-p-CN** are numbered according to Table S7.

**Table S7.** Selected excitations and occupied (occ)-unoccupied (unocc) MO pair contributions (greater than 10%) for (+)-**Ax-p-CN** with toluene. H and L indicate the HOMO and LUMO, respectively.

| Excitation | E [eV] | $\lambda$ [nm] | f     | R [ $10^{-40}$ cgs] | occ. no. | unocc no. | %  |
|------------|--------|----------------|-------|---------------------|----------|-----------|----|
| #1         | 3.350  | 370            | 0.200 | 392.81              | 163(H)   | 165       | 27 |
|            |        |                |       |                     | 163      | 166       | 19 |
| #2         | 3.396  | 365            | 0.096 | -588.51             | 163      | 164(L)    | 48 |
| #3         | 3.481  | 356            | 0.610 | 413.28              | 163      | 166       | 26 |
| #9         | 4.067  | 305            | 0.102 | -585.58             | 161      | 164       | 26 |
| #10        | 4.084  | 304            | 0.810 | 737.25              | 161      | 165       | 24 |
| #13        | 4.247  | 292            | 0.211 | 199.03              | 161      | 166       | 34 |
| #21        | 4.640  | 267            | 0.066 | -264.83             | 161      | 167       | 41 |
| #27        | 4.940  | 251            | 0.418 | 427.80              | 163      | 170       | 39 |

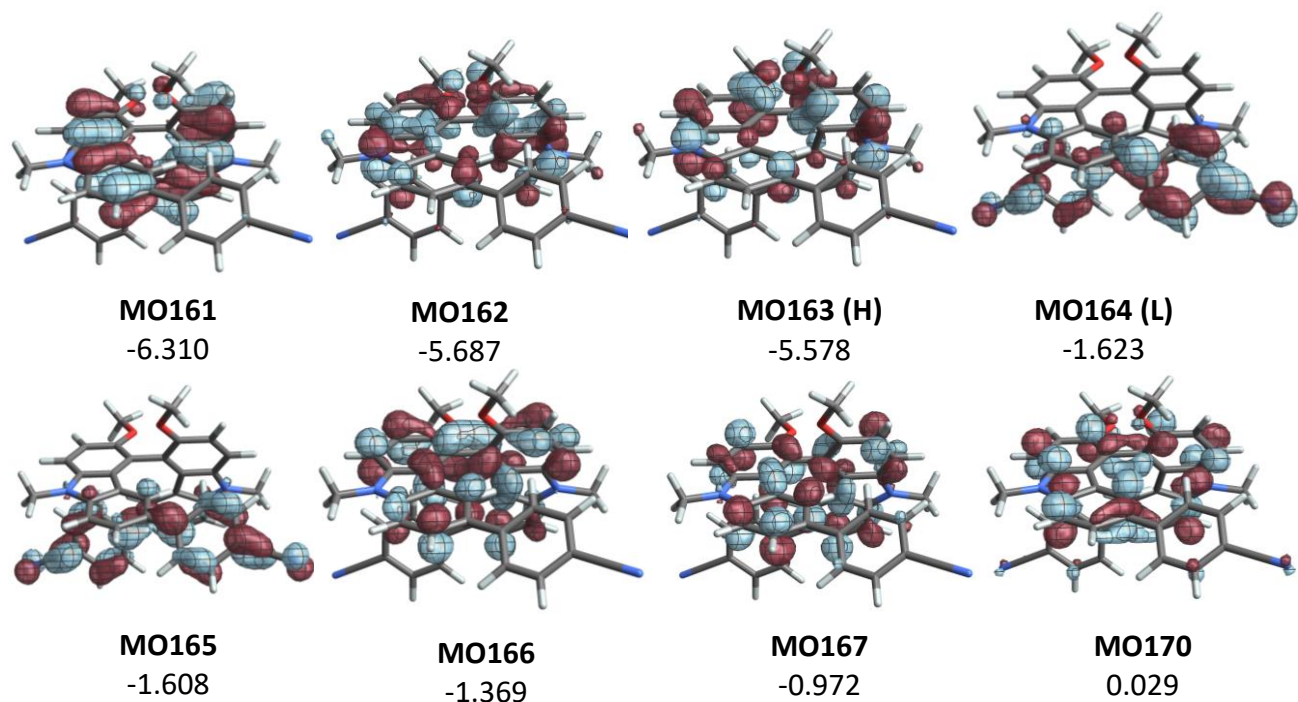

**Figure S42.** Isosurfaces ( $\pm 0.035$  au) of Molecular Orbitals (MOs) for (+)-*Ax-p*-CN (Toluene). Values listed in parentheses are the corresponding orbitals energies in eV.

**Table S8.** Selected excitations and occupied (occ)-unoccupied (unocc) MO pair contributions (greater than 15%) for (+)-*Ax-p*-CN with DFM. H and L indicate the HOMO and LUMO, respectively.

| Excitation | E [eV] | $\lambda$ [nm] | f     | R [ $10^{-40}$ cgs] | occ. no. | unocc no. | %  |
|------------|--------|----------------|-------|---------------------|----------|-----------|----|
| #1         | 3.327  | 373            | 0.271 | 466.59              | 163(H)   | 165       | 35 |
| #2         | 3.358  | 369            | 0.086 | -532.28             | 163      | 164(L)    | 48 |
| #3         | 3.451  | 359            | 0.313 | 305.76              | 162      | 164       | 47 |
| #4         | 3.473  | 357            | 0.040 | -218.15             | 162      | 165       | 47 |
| #5         | 3.488  | 355            | 0.245 | 86.26               | 163      | 166       | 34 |
| #9         | 4.042  | 307            | 0.093 | -575.91             | 161      | 164       | 27 |
| #10        | 4.066  | 305            | 0.824 | 664.72              | 161      | 165       | 27 |
| #13        | 4.267  | 291            | 0.216 | 252.49              | 161      | 166       | 39 |
| #21        | 4.633  | 268            | 0.065 | -263.98             | 161      | 167       | 39 |
| #27        | 4.944  | 251            | 0.403 | 426.93              | 163      | 170       | 38 |

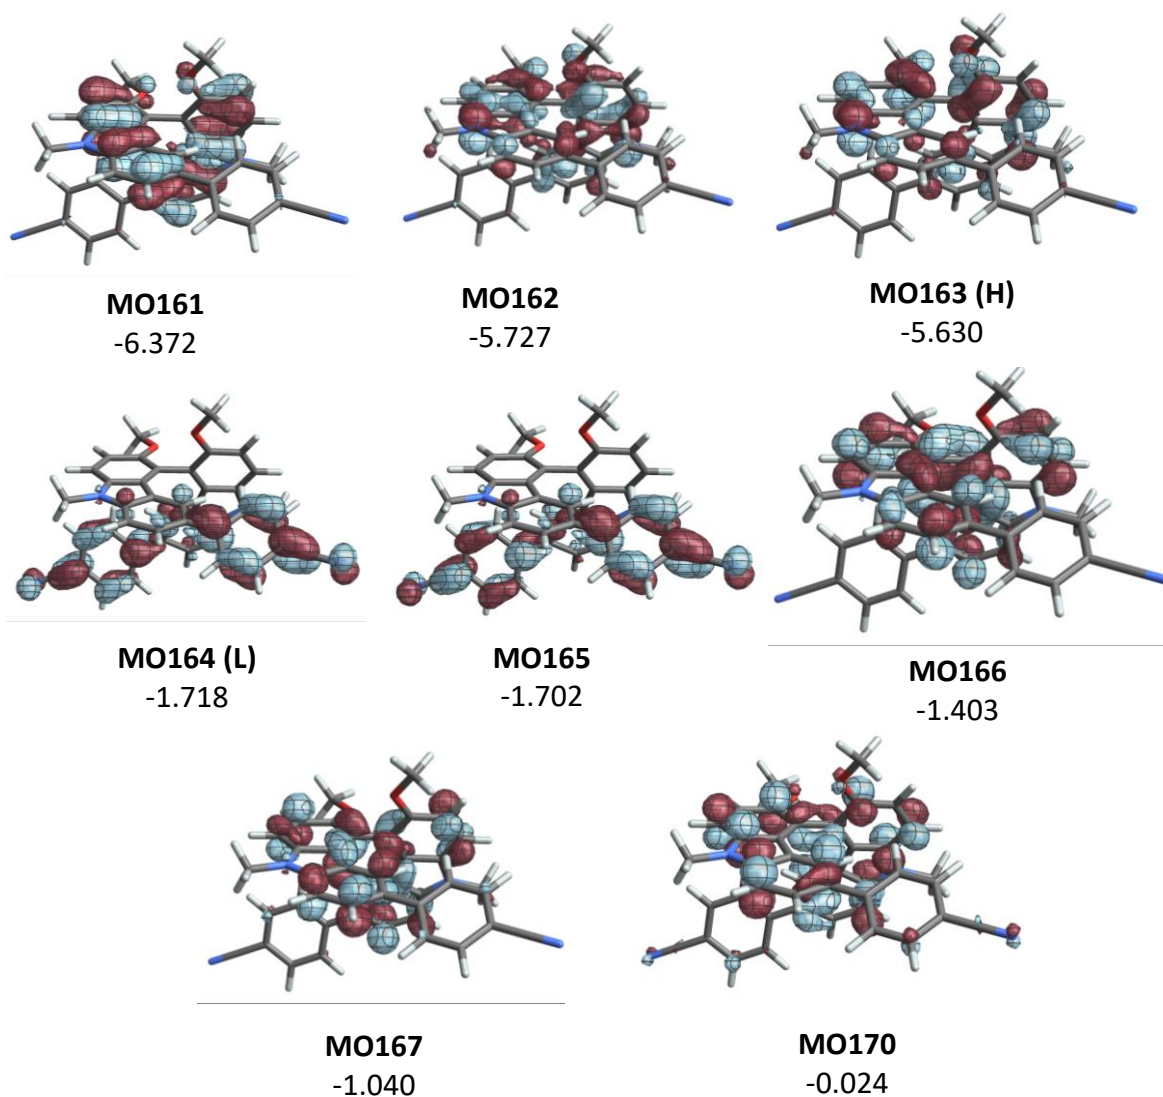

**Figure S43.** Isosurfaces ( $\pm 0.035$  au) of Molecular Orbitals (MOs) for (+)-*Ax-p-CN* (DMF). Values listed in parentheses are the corresponding orbitals energies in eV.

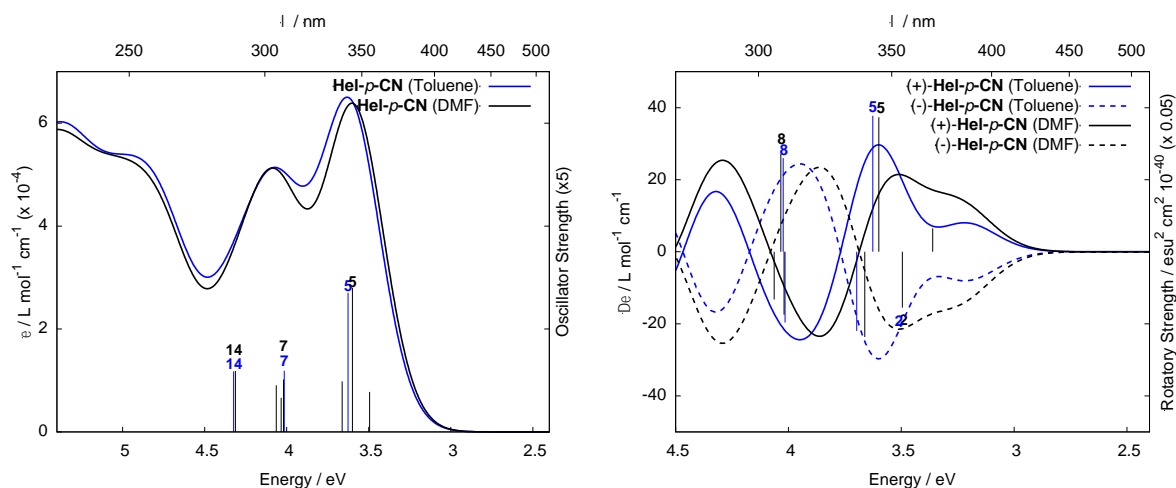

**Figure S44.** Calculated UV/Vis (left) and ECD (right) spectra of ( $\pm$ )-**Hel-p-CN**. Selected transitions and oscillator and rotatory strengths are indicated as ‘stick spectra’. Predominant transitions for (+)-**Hel-p-CN** are numbered according to Table S8.

**Table S8.** Selected excitations and occupied (occ)-unoccupied (unocc) MO pair contributions (greater than 10%) for (+)-**Hel-p-CN** with toluene. H and L indicate the HOMO and LUMO, respectively.

| Excitation | E [eV] | $\lambda$ [nm] | f     | R [ $10^{-40}$ cgs] | occ. no. | unocc no. | %  |
|------------|--------|----------------|-------|---------------------|----------|-----------|----|
| #1         | 3.366  | 368            | 0.044 | 102.37              | 158(H)   | 160       | 48 |
| #2         | 3.518  | 352            | 0.160 | -331.09             | 158      | 159(L)    | 49 |
| #5         | 3.627  | 342            | 0.540 | 755.04              | 157      | 159       | 37 |
| #6         | 3.697  | 335            | 0.179 | -439.87             | 157      | 161       | 40 |
| #7         | 4.015  | 309            | 0.238 | -392.92             | 156      | 160       | 39 |
| #8         | 4.023  | 308            | 0.119 | 520.71              | 155      | 160       | 45 |
| #9         | 4.072  | 304            | 0.150 | -215.00             | 158      | 162       | 24 |
| #10        | 4.113  | 301            | 0.110 | 15.69               | 156      | 159       | 35 |
| #14        | 4.324  | 287            | 0.235 | 43.96               | 157      | 162       | 22 |
|            |        |                |       |                     | 155      | 161       | 22 |



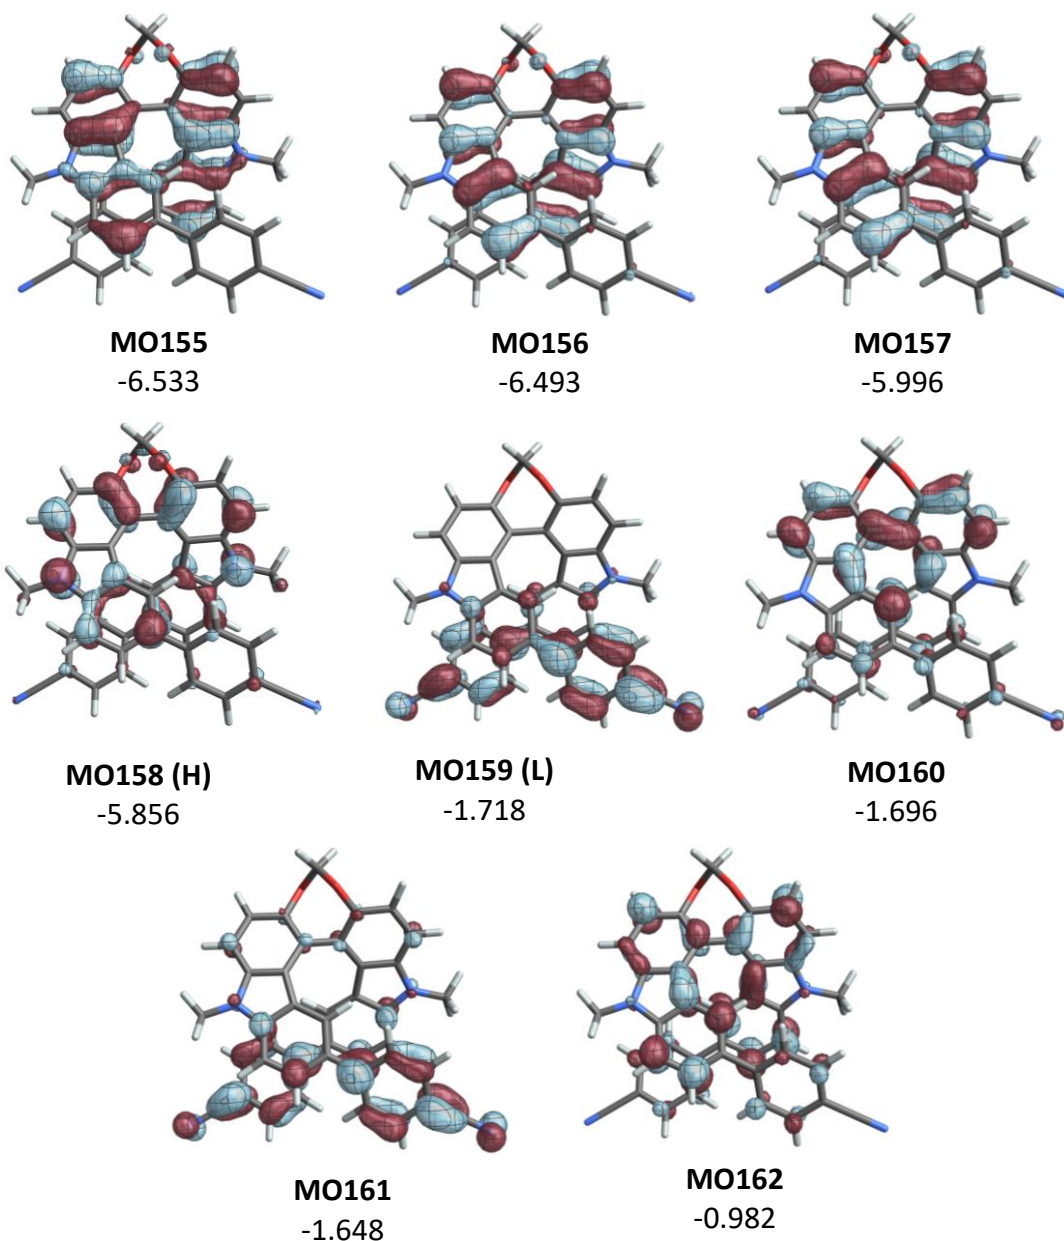

**Figure S45.** Isosurfaces ( $\pm 0.035$  au) of Molecular Orbitals (MOs) for (+)-**Hel-*p*-CN (toluene)**. Values listed in parentheses are the corresponding orbitals energies in eV.

**Table S9.** Selected excitations and occupied (occ)-unoccupied (unocc) MO pair contributions (greater than 10%) for (+)-**Hel-p**-CN with toluene. H and L indicate the HOMO and LUMO, respectively.

| Excitation | E [eV] | $\lambda$ [nm] | f     | R [ $10^{-40}$ cgs] | occ. no. | unocc no. | %  |
|------------|--------|----------------|-------|---------------------|----------|-----------|----|
| #1         | 3.366  | 368            | 0.044 | 102.37              | 158(H)   | 160       | 48 |
| #2         | 3.518  | 352            | 0.160 | -331.09             | 158      | 159(L)    | 49 |
| #5         | 3.627  | 342            | 0.540 | 755.04              | 157      | 159       | 37 |
| #6         | 3.697  | 335            | 0.179 | -439.87             | 157      | 161       | 40 |
| #7         | 4.015  | 309            | 0.238 | -392.92             | 156      | 160       | 39 |
| #8         | 4.023  | 308            | 0.119 | 520.71              | 155      | 160       | 45 |
| #9         | 4.072  | 304            | 0.150 | -215.00             | 158      | 162       | 24 |
| #10        | 4.113  | 301            | 0.110 | 15.69               | 156      | 159       | 35 |
| #14        | 4.324  | 287            | 0.235 | 43.96               | 157      | 162       | 22 |
|            |        |                |       |                     | 155      | 161       | 22 |



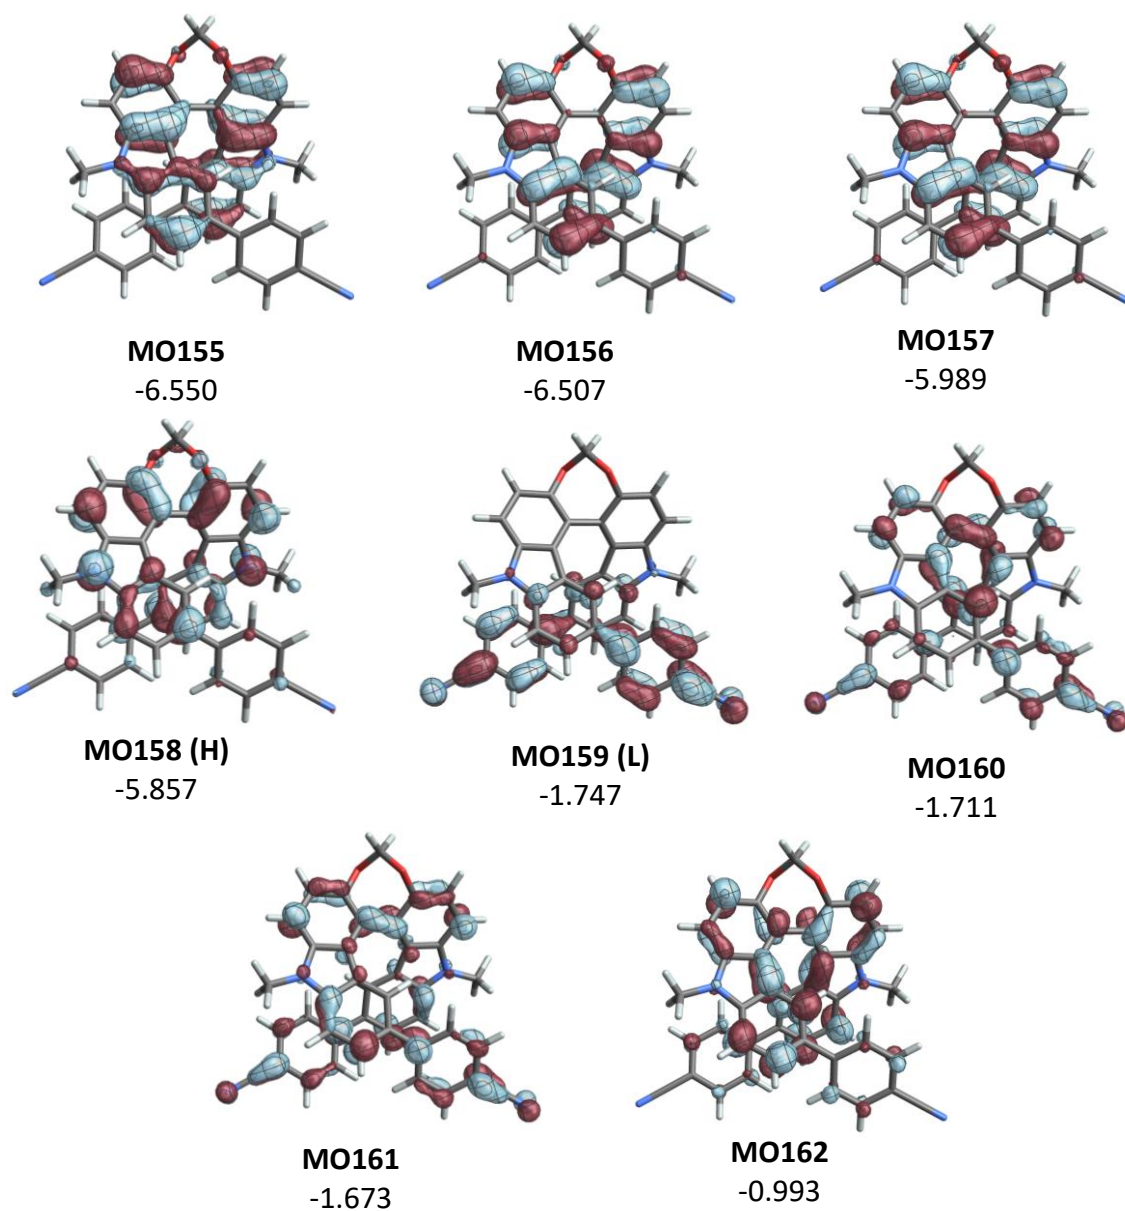

**Figure S46.** Isosurfaces ( $\pm 0.035$  au) of Molecular Orbitals (MOs) for (+)-**Hel-p-CN (DMF)**. Values listed in parentheses are the corresponding orbitals energies in eV.

## H. References

- 1 S. Kasemthaveechok, L. Abella, M. Jean, M. Cordier, T. Roisnel, N. Vanthuyne, T. Guizouarn, O. Cador, J. Autschbach, J. Crassous and L. Favereau, *J. Am. Chem. Soc.*, 2020, **142**, 20409-20418.
- 2 G. W. T. M. J. Frisch, H. B. Schlegel, G. E. Scuseria, J. R. C. M. A. Robb, G. Scalmani, V. Barone, H. N. G. A. Petersson, X. Li, M. Caricato, A. V. Marenich, B. G. J. J. Bloino, R. Gomperts, B. Mennucci, H. P. Hratchian, A. F. I. J. V. Ortiz, J. L. Sonnenberg, D. Williams-Young, F. L. F. Ding, F. Egidi, J. Goings, B. Peng, A. Petrone, D. R. T. Henderson, V. G. Zakrzewski, J. Gao, N. Rega, W. L. G. Zheng, M. Hada, M. Ehara, K. Toyota, R. Fukuda, M. I. J. Hasegawa, T. Nakajima, Y. Honda, O. Kitao, H. Nakai, K. T. T. Vreven, J. A. Montgomery, Jr., J. E. Peralta, M. J. B. F. Ogliaro, J. J. Heyd, E. N. Brothers, K. N. Kudin, T. A. K. V. N. Staroverov, R. Kobayashi, J. Normand, A. P. R. K. Raghavachari, J. C. Burant, S. S. Iyengar, M. C. J. Tomasi, J. M. Millam, M. Klene, C. Adamo, R. Cammi, R. L. M. J. W. Ochterski, K. Morokuma, O. Farkas, and D. J. F. J. B. Foresman, *Journal*, 2016. URL: [www.gaussian.com](http://www.gaussian.com).
- 3 C. Adamo and V. Barone, *J. Chem. Phys.*, 1999, **110**, 6158-6170.
- 4 aF. Weigend and R. Ahlrichs, *Phys. Chem. Chem. Phys.*, 2005, **7**, 3297-3305; bF. Weigend, *Phys. Chem. Chem. Phys.*, 2006, **8**, 1057-1065.
- 5 G. Scalmani and M. J. Frisch, *J. Chem. Phys.*, 2010, **132**, 114110.
- 6 S. Grimme, J. Antony, S. Ehrlich and H. Krieg, *J. Chem. Phys.*, 2010, **132**, 154104.
- 7 aJ. Autschbach, L. Nitsch-Velasquez and M. Rudolph, *Top. Curr. Chem.*, 2011, **298**, 1-98; bM. Srebro-Hooper and J. Autschbach, *Annu. Rev. Phys. Chem.*, 2017, **68**, 399-420.
